# Supplementary material
Source: publisher figshare collection journal article supplement (https://geolsoc.figshare.com/ndownloader/files/28207370)
Supplement: Supplementary file 1 [file 28207370]

## Sheet: Suppl. Tab. 1a - bulk rock
	Tappe, S., Shaikh, A.M., Wilson, A.H. and Stracke, A. 2021. Genesis of ultrapotassic rocks on the Kaapvaal craton: deepening the orangeite versus lamproite debate. Geological Society, London, Special Publications.
	Supplementary Table 1 (a). Major (wt.%) and trace (ppm) element compositions, as well as Sr-Nd-Hf isotopic compositions of Mesozoic Group-2 kimberlite dykes (orangeites) that intersect the western Bushveld Complex, central Kaapvaal craton, South Africa
		IMPALA													SIBANYE (Marikana)
		Orangeite							Evolved Orangeite						Evolved Orangeite
	Sample ID:	IP20-1	IP20-3	IP20-4	IP20-5	IP20-7	IP20-11		IP20-2	IP20-6	IP20-8	IP20-9	IP20-10		LM-4	LM-5	LM-6B1	LM-6B2
	Mining Block:	Shaft-20	Shaft-20	Shaft-20	Shaft-20	Shaft-20	Shaft-20		Shaft-20	Shaft-20	Shaft-20	Shaft-20	Shaft-20		Karee-3	Karee-3	Saffy	Saffy
	SiO2	38.96	36.73	41.2	40.23	40.24	38.41		38.55	36.44	32.22	38.21	40.13		40.05	38.61	40.07	38.69
	TiO2	0.912	0.782	1.236	1.08	1.094	0.871		2.926	2.83	3.044	1.628	1.306		1.88	1.93	1.89	1.78
	Al2O3	4.739	6.215	5.553	4.772	4.636	6.638		4.409	4.547	5.655	5.861	5.464		6.37	6.59	6.48	6.28
	Fe2O3T	7.643	8.054	9.461	8.561	9.393	7.698		12.33	11.26	11.74	10.15	9.056		10.22	10.06	10.33	10.05
	MnO	0.129	0.181	0.162	0.135	0.138	0.161		0.223	0.192	0.178	0.194	0.152		0.18	0.17	0.16	0.17
	MgO	26.05	22.62	22.81	25.66	22.92	23.18		16.64	16.47	15.11	18.78	20.23		15.52	14.89	15.79	17.1
	CaO	7.474	8.689	7.505	6.242	8.68	7.22		10.92	11.66	13.43	8.332	9.76		11.33	10.86	11.83	10.44
	Na2O	0.05	0.122	0.683	0.486	0.582	0.082		1.653	1.48	1.055	1.272	1.53		1.61	1.23	1.14	1
	K2O	4.308	6.192	3.206	3.283	3.153	6.221		5.006	5.232	5.275	6.899	3.288		3.23	4.38	3.15	3.76
	P2O5	0.351	0.096	0.605	0.482	0.663	b.d.		1.724	1.703	1.18	0.605	0.535		0.91	0.97	0.9	0.89
	Cr2O3	0.377	0.312	0.217	0.216	0.22	0.289		0.149	0.13	0.147	0.227	0.202		0.16	0.16	0.16	0.17
	NiO	0.137	0.104	0.132	0.15	0.139	0.106		0.069	0.065	0.05	0.078	0.114		0.06	0.05	0.06	0.06
	LOI	6.9	8.27	5.27	6.65	5.8	7.03		3.04	4.79	7.72	5.29	5.76		6.32	7.48	5.98	8.34
	Total	98.03	98.367	98.04	97.947	97.658	97.906		97.639	96.799	96.804	97.526	97.527		97.84	97.38	97.94	98.73
	CO2	2.01079	4.70941	0.28	1.62462	0.45434	2.1478		0.597338	0.33	3.0978	0.25	0.399268		1.08355	3.02347	0.632285	2.95593
	SO3	0.192	0.351	0.512	0.652	1.209	b.d.		0.376	0.438	0.76	0.101	1.026		0.29	0.12	0.32	0.21
	Co	56.126	53.839	55.142	57.293	56.357	70.351		51.53	48.458	47.344	59.641	64.952		58.34	54.847	58.527	59.703
	Cr	811.152	1502.6	454.047	419.065	464.839	1693.5		701.499	558.114	415.207	1259.66	485.072		495.714	528.542	459.668	562.76
	Ni	871.486	654.888	807.416	929.61	850.029	775.718		441.353	432.487	302.147	578.723	797.846		430.381	341.222	427.353	453.786
	Cu	38.764	5.927	37.49	29.15	37.051	8.542		96.5	94.635	39.561	52.872	49.058		63.512	63.231	63.265	59.729
	Zn	37.13	34.437	51.567	40.607	51.934	47.591		66.37	65.294	59.592	76.355	74.581		82.755	85.797	88.46	81.95
	Sc	8.583	7.384	11.504	10.211	11.263	19.637		24.802	25.822	21.327	15.615	18.61		23.148	23.238	22.873	21.105
	V	112.369	16.992	122.563	96.41	115.014	27.86		51.307	59.891	110.39	115.107	291.855		214.515	287.276	144.429	285.617
	Ga	6.505	6.72	6.898	6.483	6.598	11.589		9.99	10.224	10.432	15.01	11.938		15.892	16.294	17.044	15.896
	Ba	1802.26	2946.42	2785.65	2115.08	3035.55	2734.34		4047.06	4937.58	4650.99	4646.91	6105.63		1863.89	2938.07	3326.55	3153.77
	Li	1.624	1.983	5.176	4.39	4.14	4		8.079	7.55	5.883	9.687	5.55		10.513	11.009	7.446	10.421
	Cs	1.949	2.244	1.35	1.177	1.41	2.723		2.884	2.765	2.487	3.656	1.996		1.911	2.061	1.544	1.84
	Rb	153.373	145.484	105.597	91.775	93.253	265.597		179.346	172.937	191.437	339.74	153.215		193.519	230.026	171.804	202.409
	Sr	435.347	807.597	720.054	447.833	667.62	796.709		1060.62	1189.32	1416.7	1047.26	956.908		857.597	942.328	746.484	857.628
	Zr	84.158	66.273	110.38	106.116	129.784	68.258		389.395	396.903	174.237	189.073	148.586		310.262	305.829	307.072	272.006
	Hf	2.533	2.452	3.883	3.61	4.164	2.565		12.184	13.025	5.84	4.808	4.205		7.802	7.704	7.418	6.668
	Nb	50.874	42.151	61.272	48.35	61.38	46.672		120.423	108.803	102.128	60.55	82.89		107.512	102.966	107.288	94.045
	Ta	3.073	2.419	3.877	3.141	3.9	4.168		5.81	5.963	5.716	2.426	4.297		4.972	4.891	4.931	4.481
	Y	4.513	11.448	9.591	6.188	10.435	12.055		33.909	34.906	19.595	20.435	14.096		21.008	21.236	20.667	19.216
	Pb	8.841	4.012	14.021	7.109	13.876	2.738		17.736	19.579	25.211	14.791	41.871		28.26	24.626	27.657	23.424
	Th	5.527	8.402	8.709	5.247	9.465	12.895		20.685	25.2	20.194	9.56	13.209		15.905	15.737	15.381	14.186
	U	1.76	0.974	1.583	1.766	2.446	1.501		5.914	6.284	5.591	4.852	4.082		4.932	4.404	4.782	4.156
	W	5.289	0.249	0.303	0.571	1.484	0.123		0.554	0.653	0.539	0.797	2.494		0.299	1.275	0.2	0.329
	La	45.763	55.234	65.694	46.51	67.858	61.221		172.171	199.047	169.049	80.46	83.928		108.291	106.991	102.282	95.934
	Ce	91.559	114.465	130.869	92.311	134.615	134.058		344.621	395.817	330.163	147.539	159.496		225.724	212.454	214.181	190.462
	Pr	10.629	13.347	15.305	10.898	15.851	15.952		39.574	44.788	36.391	16.824	18.077		24.697	24.937	23.4	22.456
	Nd	38.866	47.512	55.416	40.794	57.356	58.919		141.367	157.917	122.171	61.125	65.081		85.088	91.957	79.199	80.092
	Sm	6.199	8.375	8.978	6.568	9.647	9.17		25.107	28.301	20.419	11.538	12.381		13.201	14.102	13.36	12.889
	Eu	1.662	2.415	2.47	1.774	2.639	2.548		6.525	7.397	5.322	3.717	4.006		3.173	3.632	3.507	3.336
	Gd	3.952	5.66	6.297	4.522	6.64	6.339		18.609	20.647	14.418	7.666	7.387		9.964	10.227	9.544	9.282
	Tb	0.432	0.726	0.73	0.52	0.795	0.729		2.42	2.668	1.69	0.989	0.844		1.187	1.223	1.137	1.118
	Dy	1.482	3.227	2.853	1.992	3.114	2.771		10.444	11.281	6.504	4.354	3.146		4.789	4.829	4.543	4.304
	Ho	0.204	0.513	0.43	0.295	0.494	0.402		1.59	1.728	0.963	0.693	0.465		0.703	0.732	0.672	0.643
	Er	0.511	1.142	1.005	0.712	1.175	1.1		3.438	3.671	2.259	1.58	1.195		1.763	1.787	1.725	1.57
	Tm	0.059	0.171	0.138	0.094	0.155	0.143		0.46	0.489	0.281	0.2	0.15		0.218	0.211	0.22	0.201
	Yb	0.354	1.052	0.827	0.583	0.946	0.907		2.537	2.767	1.69	1.103	0.937		1.304	1.311	1.251	1.165
	Lu	0.051	0.146	0.118	0.089	0.13	0.132		0.344	0.361	0.235	0.151	0.137		0.193	0.186	0.183	0.172
	87Sr/86Sr (m)	0.709390(6)	0.708025(7)						0.707962(6)						0.708486(5)	0.708555(7)	0.708592(7)	0.708620(7)
	*87Sr/86Sr (i)	0.70741	0.707013						0.707012						0.707218	0.707183	0.707299	0.707293
	143Nd/144Nd (m)	0.512243(6)	0.512054(8)						0.512030(6)						0.511993(6)	0.511997(5)	0.512003(7)	0.512010(5)
	*143Nd/144Nd (i)	0.512154	0.511956						0.511932						0.511907	0.511912	0.511909	0.511921
	**eNd (i)	-5.78294	-9.63943						-10.1262						-10.6076	-10.505	-10.5662	-10.3356
	2S.D.	0.4371	0.419775						0.407633						0.444055	0.442331	0.42728	0.429526
	176Hf/177Hf (m)	0.282633(7)	0.282476(7)						0.282301(6)						0.282358(7)	0.282350(6)	0.282352(9)	0.282350(7)
	*176Hf/177Hf (i)	0.282626	0.282454						0.282291						0.282349	0.282342	0.282343	0.28234
	***eHf (i)	-2.51626	-8.58566						-14.3842						-12.3099	-12.5779	-12.5327	-12.6244
	2S.D.	0.729218	0.653346						0.701343						0.719356	0.709693	0.747309	0.717237
	DeHf (i)	5.39861	5.46103						0.436475						3.27617	2.84507	2.98752	2.52913
	Major and minor element concentrations are XRF data determined at the University of Johannesburg; b.d. = below detection.
	Trace element concentrations are solution ICP-MS data determined at the University of the Witwatersrand. The CO2 concentrations were determined at the University of Münster.
	Fe2O3T = total Fe as ferric iron; LOI is defined as the difference in sample weight after ignition at 930°C for 30 minutes.
	Sr isotope ratios were determined by TIMS, and Nd-Hf isotope ratios were determined by MC-ICP-MS at the University of Münster.
	*Initial isotope ratios calculated for a magma emplacement age of 140 Ma (Tappe et al. 2018) using the following decay constants: 87Rb 1.42*10-11 a-1; 147Sm 6.54*10-12 a-1; 176Lu 1.865*10-11 a-1.
	**Initial epsilon Nd values calculated using 147Sm decay constant of 6.54*10-12 a-1 (Lugmair and Marti 1978); (143Nd/144Nd)CHUR = 0.512630 and (147Sm/144Nd)CHUR = 0.1960 (Bouvier et al. 2008).
	***Initial epsilon Hf values calculated using 176Lu decay constant of 1.865*10-11 a-1 (Scherer et al. 2001); (176Hf/177Hf)CHUR = 0.282785 and (176Lu/177Hf)CHUR = 0.0336 (Bouvier et al. 2008).
	The 2S.D. uncertainties of the epsilon Nd and Hf values entail a full error propagation following Ickert (2013), where the uncertainties of the emplacement age and parent-daughter element ratios were set at 20% and 5%, respectively.
	ΔεHf (i) is defined as eHfi-(1.59*eNdi+1.28), such that analyses with positive values fall by definition above the Nd-Hf isotope regression line of Chauvel et al. (2008).
	Numbers in parentheses are 2-sigma-of-the-mean uncertainties for individual isotope ratio measurements.
	REFERENCES:
	Bouvier, A., Vervoort, J.D. and Patchett, P.J. 2008. The Lu-Hf and Sm-Nd isotopic composition of CHUR: Constraints from unequilibrated chondrites and implications for the bulk composition of terrestrial planets. Earth and Planetary Science Letters, 273, 48-57, https://doi.org/10.1016/j.epsl.2008.06.010.
	Chauvel, C., Lewin, E., Carpentier, M., Arndt, N.T. and Marini, J.C. 2008. Role of recycled oceanic basalt and sediment in generating the Hf-Nd mantle array. Nature Geoscience, 1, 64-67.
	Ickert, R.B. 2013. Algorithms for estimating uncertainties in initial radiogenic isotope ratios and model ages. Chemical Geology, 340, 131-138.
	Lugmair, G.W. and Marti, K. 1978. Lunar initial 143Nd/144Nd: Differential evolution of the lunar crust and mantle. Earth and Planetary Science Letters, 39, 349-357.
	Scherer, E.E., Münker, C. and Mezger, K. 2001. Calibration of the lutetium-hafnium clock. Science, 293, 683-687.
	Tappe, S., Smart, K.A., Torsvik, T.H., Massuyeau, M. and de Wit, M.C.J. 2018. Geodynamics of kimberlites on a cooling Earth: Clues to plate tectonic evolution and deep volatile cycles. Earth and Planetary Science Letters, 484, 1-14.

## Sheet: Suppl. Tab. 1b - olivine
	Tappe, S., Shaikh, A.M., Wilson, A.H. and Stracke, A. 2021. Genesis of ultrapotassic rocks on the Kaapvaal craton: deepening the orangeite versus lamproite debate. Geological Society, London, Special Publications.
	Supplementary Table 1 (b). EPMA-determined major and minor element compositions of olivine in wt.%
				Oxides (wt.%)													Cations per formula unit based on 4 oxygens
	Dyke rock	Location	Sample and grain / spot	SiO2	TiO2	Al2O3	Cr2O3	FeO	MnO	NiO	MgO	CaO	Na2O	K2O	Total		Si	Ti	Al	Cr	Fe	Mn	Ni	Mg	Ca	Na	K	Ba	Sum	Fo(100)	Fa(100)	Mg#
	Orangeite (Group-2 kimberlite)	Impala, 20#Shaft	IP20-01_ol_xx1_co1	41.04	0.01	0.02	0.04	6.85	0.09	0.34	51.13	0.06	0.02	0	99.6		0.996863	0.000182709	0.00057255	0.000768187	0.139148	0.00185165	0.00664374	1.85147	0.00156155	0.000941901	0	0	3	93.0363	6.9637	92.9233
	Orangeite (Group-2 kimberlite)	Impala, 20#Shaft	IP20-01_ol_xx1_co2	40.94	0.02	0.02	0.06	6.93	0.08	0.34	51.02	0.06	0.01	0	99.48		0.99606	0.000366016	0.000573486	0.00115416	0.141004	0.00164861	0.0066546	1.8505	0.0015641	0.00047172	0	0	3	92.9909	7.00914	92.8429
	Orangeite (Group-2 kimberlite)	Impala, 20#Shaft	IP20-01_ol_xx1_co3	40.89	0	0.01	0.05	6.9	0.09	0.34	50.91	0.05	0.02	0	99.26		0.996918	0	0.000287341	0.00096381	0.140686	0.00185855	0.00666848	1.85037	0.00130614	0.000945409	0	0	3	92.9686	7.03138	92.8474
	Orangeite (Group-2 kimberlite)	Impala, 20#Shaft	IP20-01_ol_xx1_co4	40.74	0.02	0.01	0.05	7	0.07	0.33	51.36	0.05	0.01	0.01	99.65		0.988538	0.000365036	0.000285975	0.000959227	0.142046	0.00143867	0.00644157	1.85785	0.00129993	0.000470457	0.000309555	0	3	93.354	6.646	92.8305
	Orangeite (Group-2 kimberlite)	Impala, 20#Shaft	IP20-01_ol_xx1_co5	40.71	0.02	0.03	0.05	6.98	0.08	0.35	51.08	0.05	0.01	0	99.36		0.991248	0.000366306	0.00086091	0.000962565	0.142133	0.00164991	0.00685575	1.85415	0.00130445	0.000472094	0	0	3	93.1807	6.81931	92.8034
	Orangeite (Group-2 kimberlite)	Impala, 20#Shaft	IP20-01_ol_xx1_co6	40.92	0.03	0.02	0.05	6.92	0.1	0.33	51.14	0.06	0.01	0	99.58		0.99429	0.000548317	0.000572747	0.000960565	0.140619	0.0020581	0.00645056	1.85247	0.00156209	0.000471113	0	0	3	93.0869	6.91313	92.8488
	Orangeite (Group-2 kimberlite)	Impala, 20#Shaft	IP20-01_ol_xx1_co7	40.62	0.02	0.02	0.06	7.02	0.09	0.34	51.57	0.06	0.01	0.01	99.82		0.983517	0.000364255	0.000570726	0.00114861	0.142147	0.00184575	0.00662257	1.86145	0.00155657	0.00046945	0.000308892	0	3	93.5584	6.44156	92.8199
	Orangeite (Group-2 kimberlite)	Impala, 20#Shaft	IP20-01_ol_xx1_co8	40.93	0.02	0.01	0.06	6.82	0.1	0.33	51	0.06	0.01	0	99.34		0.996905	0.000366417	0.000287057	0.00115543	0.138917	0.00206301	0.00646594	1.8518	0.00156581	0.000472236	0	0	3	93.0404	6.95965	92.9255
	Orangeite (Group-2 kimberlite)	Impala, 20#Shaft	IP20-01_ol_xx1_co9	41.07	0.02	0.01	0.05	6.96	0.09	0.36	51.25	0.05	0.01	0	99.87		0.99525	0.000364561	0.000285603	0.00095798	0.141051	0.00184731	0.00701804	1.85146	0.00129824	0.000469845	0	0	3	93.0412	6.95883	92.8349
	Orangeite (Group-2 kimberlite)	Impala, 20#Shaft	IP20-01_ol_xx1_co10	41.01	0.01	0.02	0.07	6.9	0.1	0.34	51.14	0.05	0	0	99.64		0.996058	0.000182696	0.000572506	0.00134422	0.140153	0.00205724	0.00664323	1.85169	0.00130119	0	0	0	3	93.0084	6.99164	92.8677
	Orangeite (Group-2 kimberlite)	Impala, 20#Shaft	IP20-01_ol_xx1_co11	40.91	0	0	0.07	6.94	0.09	0.34	51.25	0.05	0.03	0	99.68		0.992697	0	0	0.00134296	0.140834	0.00184977	0.006637	1.85393	0.00129997	0.00141142	0	0	3	93.1895	6.81049	92.8537
	Orangeite (Group-2 kimberlite)	Impala, 20#Shaft	IP20-01_ol_xx1_co12	40.77	0.02	0.02	0.05	6.94	0.09	0.36	51.3	0.06	0.01	0	99.62		0.989737	0.000365209	0.000572222	0.000959683	0.140896	0.00185059	0.00703051	1.85656	0.00156066	0.000470681	0	0	3	93.3036	6.69641	92.8602
	Orangeite (Group-2 kimberlite)	Impala, 20#Shaft	IP20-01_ol_xx1_co13	40.67	0.02	0	0.07	6.88	0.07	0.33	51.56	0.06	0.01	0	99.67		0.985805	0.000364653	0	0.00134151	0.139465	0.00143716	0.00643482	1.86312	0.00155828	0.000469963	0	0	3	93.6079	6.39214	92.9691
	Orangeite (Group-2 kimberlite)	Impala, 20#Shaft	IP20-01_ol_xx1_co14	40.97	0.01	0.02	0.07	6.92	0.09	0.35	51.14	0.06	0.01	0.01	99.65		0.994932	0.000182667	0.000572417	0.00134402	0.140538	0.00185123	0.00683756	1.8514	0.00156119	0.000470841	0.000309808	0	3	93.0582	6.94176	92.8584
	Orangeite (Group-2 kimberlite)	Impala, 20#Shaft	IP20-01_ol_xx1_co15	40.97	0.02	0.01	0.07	6.88	0.07	0.38	51.52	0.06	0.01	0	99.99		0.990736	0.000363794	0.000285002	0.00133835	0.139136	0.00143377	0.00739233	1.85729	0.0015546	0.000468856	0	0	3	93.3696	6.63037	92.964
	Orangeite (Group-2 kimberlite)	Impala, 20#Shaft	IP20-01_ol_xx2_co1	41.04	0	0.03	0.07	7.91	0.11	0.41	50.43	0.07	0.01	0	100.08		0.997384	0	0.000859274	0.00134503	0.160765	0.00226432	0.00801575	1.82707	0.00182276	0.000471197	0	0	3	91.8667	8.13331	91.808
	Orangeite (Group-2 kimberlite)	Impala, 20#Shaft	IP20-01_ol_xx2_co2	41.07	0.01	0.02	0.06	7.72	0.09	0.39	50.54	0.07	0.02	0.01	100		0.997934	0.000182772	0.000572747	0.00115268	0.156875	0.00185229	0.00762338	1.83073	0.00182244	0.000942225	0.000309986	0	3	92.0862	7.9138	92.0216
	Orangeite (Group-2 kimberlite)	Impala, 20#Shaft	IP20-01_ol_xx2_co3	40.76	0.02	0.02	0.06	7.71	0.09	0.42	50.59	0.07	0.02	0	99.76		0.99221	0.000366212	0.000573792	0.00115478	0.156958	0.00185567	0.00822478	1.83589	0.00182576	0.000943945	0	0	3	92.3703	7.62967	92.0382
	Orangeite (Group-2 kimberlite)	Impala, 20#Shaft	IP20-01_ol_xx2_co4	40.82	0.04	0.02	0.07	7.67	0.1	0.39	50.2	0.07	0.01	0.01	99.4		0.998159	0.000735732	0.000576384	0.00135333	0.156849	0.00207117	0.00767179	1.82996	0.00183401	0.000474104	0.000311955	0	3	92.0782	7.92176	92.0096
	Orangeite (Group-2 kimberlite)	Impala, 20#Shaft	IP20-01_ol_xx2_co5	40.94	0.04	0.04	0.06	7.73	0.11	0.4	50.47	0.07	0.02	0	99.88		0.996128	0.000732083	0.00114705	0.00115424	0.157292	0.00226699	0.00782948	1.83068	0.00182491	0.000943506	0	0	3	92.1355	7.86445	91.9829
	Evolved Orangeite (Group-2 kimberlite)	Impala, 20#Shaft	IP20-02_ol_xx01_co1	40.28	0	0.01	0.06	8.48	0.12	0.42	50.1	0.13	0.01	0	99.61		0.984704	0	0.000288119	0.0011597	0.173369	0.00248477	0.00825983	1.82585	0.00340515	0.000473984	0	0	3	91.7976	8.20238	91.2148
	Evolved Orangeite (Group-2 kimberlite)	Impala, 20#Shaft	IP20-02_ol_xx01_co2	40.03	0.02	0.01	0.08	8.52	0.14	0.43	50.29	0.12	0.01	0	99.65		0.977702	0.000367438	0.000287857	0.00154486	0.174028	0.00289626	0.0084488	1.83111	0.00314036	0.000473552	0	0	3	92.1218	7.87824	91.1892
	Evolved Orangeite (Group-2 kimberlite)	Impala, 20#Shaft	IP20-02_ol_xx01_co3	39.85	0.02	0.01	0.06	8.46	0.14	0.44	50.13	0.14	0.02	0	99.27		0.97677	0.000368746	0.000288881	0.00116277	0.173418	0.00290657	0.00867605	1.83178	0.00367679	0.000950476	0	0	3	92.1823	7.81771	91.2194
	Evolved Orangeite (Group-2 kimberlite)	Impala, 20#Shaft	IP20-02_ol_xx01_co4	39.83	0.02	0.02	0.07	8.5	0.11	0.46	50.38	0.14	0.01	0	99.54		0.973281	0.000367613	0.000575988	0.0013524	0.173703	0.00227672	0.00904256	1.83526	0.00366549	0.000473778	0	0	3	92.3567	7.64334	91.2502
	Evolved Orangeite (Group-2 kimberlite)	Impala, 20#Shaft	IP20-02_ol_xx01_co5	39.89	0.01	0.01	0.06	8.62	0.16	0.44	50.4	0.11	0.01	0	99.71		0.973501	0.000183572	0.000287626	0.00115772	0.17593	0.00330736	0.00863835	1.83364	0.00287635	0.000473173	0	0	3	92.2233	7.77673	91.0955
	Evolved Orangeite (Group-2 kimberlite)	Impala, 20#Shaft	IP20-02_ol_xx01_rim1	40.14	0.03	0.01	0.06	8.72	0.12	0.44	49.87	0.16	0.01	0.01	99.57		0.982873	0.000552553	0.000288586	0.00116158	0.178565	0.0024888	0.00866719	1.82042	0.00419775	0.000474752	0.000312381	0	3	91.6182	8.38176	90.954
	Evolved Orangeite (Group-2 kimberlite)	Impala, 20#Shaft	IP20-02_ol_xx01_rim2	39.6	0.01	0.02	0.06	8.99	0.14	0.42	49.87	0.12	0.01	0	99.24		0.972605	0.000184746	0.000578931	0.00116512	0.184655	0.00291245	0.00829844	1.82597	0.00315791	0.000476199	0	0	3	91.8286	8.17139	90.6847
	Evolved Orangeite (Group-2 kimberlite)	Impala, 20#Shaft	IP20-02_ol_xx01_rim3	39.69	0.01	0	0.03	9.21	0.13	0.44	50.17	0.13	0.01	0.01	99.83		0.969221	0.000183685	0	0.000579218	0.188088	0.0026889	0.00864371	1.82641	0.00340143	0.000473466	0.000311535	0	3	91.8502	8.14982	90.5424
	Evolved Orangeite (Group-2 kimberlite)	Impala, 20#Shaft	IP20-02_ol_xx01_rim4	39.36	0.01	0.01	0.06	9.95	0.16	0.42	49.12	0.14	0.01	0	99.24		0.970912	0.000185549	0.000290724	0.00117019	0.205262	0.00334298	0.00833451	1.80632	0.00370024	0.000478269	0	0	3	90.8414	9.15857	89.647
	Evolved Orangeite (Group-2 kimberlite)	Impala, 20#Shaft	IP20-02_ol_xx01_rim5	39.61	0.02	0	0.07	9.01	0.13	0.43	50.27	0.12	0.01	0	99.67		0.967981	0.000367642	0	0.00135251	0.184139	0.00269088	0.00845349	1.8314	0.0031421	0.000473815	0	0	3	92.1215	7.87846	90.7429
	Evolved Orangeite (Group-2 kimberlite)	Impala, 20#Shaft	IP20-02_ol_xx01_rim6	39.2	0.02	0.01	0.05	9.46	0.15	0.38	49.95	0.15	0.02	0	99.39		0.961773	0.000369105	0.000289162	0.000969919	0.194105	0.00311722	0.00750025	1.82698	0.00394325	0.000951401	0	0	3	91.8742	8.12584	90.2568
	Evolved Orangeite (Group-2 kimberlite)	Impala, 20#Shaft	IP20-02_ol-in-phl_xx02_co1	39.11	0.03	0.02	0.18	10.71	0.2	0.19	48.24	0.22	0.01	0.06	98.97		0.971081	0.000560302	0.000585266	0.00353362	0.222391	0.00420617	0.00379513	1.78561	0.00585285	0.00048141	0.00190057	0	3	89.8517	10.1483	88.7389
	Evolved Orangeite (Group-2 kimberlite)	Impala, 20#Shaft	IP20-02_ol-in-phl_xx02_co2	39.58	0.04	0.02	0.19	10.46	0.22	0.21	48.32	0.21	0.03	0.06	99.34		0.97905	0.000744256	0.000583062	0.00371588	0.216382	0.00460937	0.00417883	1.78184	0.00556577	0.00143879	0.00189341	0	3	89.7704	10.2296	88.9661
	Evolved Orangeite (Group-2 kimberlite)	Impala, 20#Shaft	IP20-02_ol-in-phl_xx02_co3	39.64	0.05	0.02	0.23	10.47	0.22	0.19	48.23	0.21	0.01	0.06	99.33		0.981194	0.000930946	0.000583454	0.0045012	0.216734	0.00461247	0.00378339	1.77972	0.00556951	0.00047992	0.00189469	0	3	89.6313	10.3687	88.9385
	Evolved Orangeite (Group-2 kimberlite)	Impala, 20#Shaft	IP20-02_ol-in-phl_xx02_co4	39.23	0.03	0.01	0.2	10.38	0.22	0.17	48.33	0.23	0.02	0.06	98.88		0.973955	0.000560241	0.000292601	0.00392581	0.215515	0.00462629	0.00339528	1.78875	0.00611822	0.000962715	0.00190036	0	3	90.0336	9.96644	89.0416

## Sheet: Suppl. Tab. 1c - mica
	Tappe, S., Shaikh, A.M., Wilson, A.H. and Stracke, A. 2021. Genesis of ultrapotassic rocks on the Kaapvaal craton: deepening the orangeite versus lamproite debate. Geological Society, London, Special Publications.
	Supplementary Table 1 (c). EPMA-determined major and minor element compositions of phlogopite and biotite in wt.%
				Oxides (wt.%)															Cations per formula unit based on 22 oxygens
	Dyke rock	Location	Sample and grain / spot	SiO2	TiO2	Al2O3	Cr2O3	FeO	MnO	MgO	CaO	Na2O	K2O	BaO	F	Cl	Total		Si	Ti	Al	Cr	Fe	Mn	Mg	Ca	Na	K	Ba	Total	8-Si	Al(IV)	Al(VI)	Fe3(IV)	Fe2(VI)	Mg#
	Orangeite (Group-2 kimberlite)	Impala, 20#Shaft	IP20-01_phl_xx1_co1	40.95	2.82	13.07	0.36	4.99	0.03	23.32	0.02	0.06	10	0.69	1.09	0	97.4		5.79525	0.300193	2.17996	0.040281	0.590579	0.00359608	4.91993	0.00303267	0.0164633	1.80544	0.0382662	15.693	2.20475	2.17996	0	0.0247876	0.565792	89.6861
	Orangeite (Group-2 kimberlite)	Impala, 20#Shaft	IP20-01_phl_xx1_co2	41.08	2.74	13.28	0.33	5.33	0.06	23.36	0.04	0.07	9.91	0.51	1.02	0.01	97.74		5.7882	0.2904	2.2053	0.0367626	0.628058	0.00716067	4.9068	0.00603879	0.0191231	1.78136	0.0281599	15.6974	2.2118	2.2053	0	0.00650314	0.621555	88.757
	Orangeite (Group-2 kimberlite)	Impala, 20#Shaft	IP20-01_phl_xx1_rim1	42.24	2.47	11.5	0.28	7.39	0.09	23.49	0.03	0.08	10.18	0.22	0.57	0.01	98.55		5.89735	0.259396	1.89228	0.0309079	0.862853	0.010643	4.88909	0.00448777	0.0216556	1.8132	0.0120366	15.6939	2.10265	1.89228	0	0.210367	0.652486	88.2256
	Orangeite (Group-2 kimberlite)	Impala, 20#Shaft	IP20-01_phl_xx1_rim2	41.95	1.19	8.54	0.02	10.7	0.08	23.5	0.03	0.06	10.01	0.22	0.16	0	96.46		6.02081	0.12847	1.44456	0.00226951	1.2843	0.00972529	5.02809	0.0046134	0.0166964	1.83283	0.0123735	15.7848	1.97919	1.44456	0	0.534622	0.749679	87.0248
	Orangeite (Group-2 kimberlite)	Impala, 20#Shaft	IP20-01_phl_xx1_rim3	41.82	0.82	7.03	0.01	12.17	0.13	23.24	0.03	0.08	9.76	0.12	0.16	0	95.37		6.09144	0.0898428	1.20683	0.00115164	1.48247	0.0160387	5.04643	0.00468203	0.022593	1.81364	0.0068496	15.782	1.90856	1.20683	0	0.701725	0.780747	86.6016
	Orangeite (Group-2 kimberlite)	Impala, 20#Shaft	IP20-01_phl_xx2_co1	41.03	2.42	12.29	0.43	6.41	0.02	23.2	0.03	0.05	10.16	0.34	0.78	0.01	97.17		5.82268	0.258327	2.05555	0.0482469	0.760745	0.00240404	4.90819	0.00456162	0.0137575	1.83942	0.0189081	15.7328	2.17732	2.05555	0	0.121765	0.63898	88.481
	Orangeite (Group-2 kimberlite)	Impala, 20#Shaft	IP20-01_phl_xx2_co2	41.75	2.55	11.4	0.37	7.04	0.08	22.86	0.02	0.07	10.27	0.21	0.52	0	97.14		5.91301	0.27166	1.90288	0.0414317	0.833843	0.00959691	4.82659	0.003035	0.0192219	1.85561	0.0116552	15.6885	2.08699	1.90288	0	0.184108	0.649735	88.1356
	Orangeite (Group-2 kimberlite)	Impala, 20#Shaft	IP20-01_phl_xx2_co3	41.84	1.95	10.64	0.14	7.99	0.08	23.34	0.03	0.07	10.23	0.19	0.39	0	96.89		5.94675	0.208476	1.78232	0.0157324	0.949717	0.00963091	4.9454	0.00456863	0.01929	1.85493	0.0105825	15.7474	2.05325	1.78232	0	0.270932	0.678785	87.931
	Orangeite (Group-2 kimberlite)	Impala, 20#Shaft	IP20-01_phl_xx2_co4	42.08	1.2	8.57	0.08	10.3	0.12	23.5	0.03	0.07	10	0.12	0.23	0	96.3		6.04043	0.129571	1.44987	0.00907949	1.23649	0.0145903	5.02889	0.00461414	0.0194822	1.83129	0.00675027	15.7711	1.95957	1.44987	0	0.509698	0.726788	87.3727
	Orangeite (Group-2 kimberlite)	Impala, 20#Shaft	IP20-01_phl_xx2_rim1	41.13	0.54	4.87	0.04	16.15	0.2	22.16	0.12	0.08	9.74	0.06	0.13	0.01	95.23		6.09594	0.0602017	0.85068	0.00468728	2.00177	0.0251074	4.89625	0.0190563	0.0229889	1.84164	0.00348482	15.8218	1.90406	0.85068	0	1.05338	0.948383	83.7734
	Orangeite (Group-2 kimberlite)	Impala, 20#Shaft	IP20-01_phl_xx2_rim2	40.42	0.6	5.28	0	16.01	0.22	21.46	0.06	0.06	9.92	0.06	0.03	0	94.12		6.07329	0.0678129	0.935012	0	2.01177	0.0279988	4.80695	0.00965953	0.0174794	1.90154	0.00353286	15.855	1.92671	0.935012	0	0.991695	1.02008	82.494
	Orangeite (Group-2 kimberlite)	Impala, 20#Shaft	IP20-01_phl_xx3_co1	40.8	2.66	13.03	0.23	5.41	0.05	23.17	0.03	0.05	10.14	0.56	0.99	0	97.12		5.79603	0.28424	2.18158	0.0258332	0.642729	0.00601631	4.90692	0.00456635	0.0137717	1.8377	0.031175	15.7306	2.20397	2.18158	0	0.0223879	0.620341	88.7767
	Orangeite (Group-2 kimberlite)	Impala, 20#Shaft	IP20-01_phl_xx3_co2	41.36	2.48	12.79	0.17	5.53	0.06	23.59	0.01	0.05	10.19	0.49	0.92	0	97.64		5.83263	0.263068	2.12574	0.0189545	0.652182	0.00716679	4.95934	0.00151099	0.013671	1.83326	0.0270787	15.7346	2.16737	2.12574	0	0.0416291	0.610553	89.0383
	Orangeite (Group-2 kimberlite)	Impala, 20#Shaft	IP20-01_phl_xx3_co3	40.69	2.57	12.69	0.35	5.98	0.04	23.16	0.03	0.05	10.23	0.47	0.88	0	97.14		5.78421	0.274804	2.12605	0.0393372	0.710914	0.00481622	4.90803	0.00456935	0.0137808	1.85523	0.026182	15.7479	2.21579	2.12605	0	0.0897367	0.621178	88.7655
	Orangeite (Group-2 kimberlite)	Impala, 20#Shaft	IP20-01_phl_xx3_rim1	41.38	1.01	7.56	0.05	11.48	0.15	23.01	0.05	0.06	9.78	0.21	0.15	0.01	94.9		6.05455	0.111159	1.30367	0.00578416	1.40473	0.0185897	5.01903	0.00783859	0.0170212	1.82555	0.0120409	15.78	1.94545	1.30367	0	0.641783	0.762946	86.8048
	Orangeite (Group-2 kimberlite)	Impala, 20#Shaft	IP20-01_phl_xx3_rim2	42.12	0.95	7.27	0.03	12.07	0.21	23.15	0.06	0.06	10.21	0.11	0.11	0	96.35		6.08111	0.103169	1.23704	0.00342448	1.45734	0.0256805	4.98262	0.00928159	0.0167955	1.88055	0.0062235	15.8032	1.91889	1.23704	0	0.681849	0.775493	86.5322
	Orangeite (Group-2 kimberlite)	Impala, 20#Shaft	IP20-01_phl_xx4_co1	41.55	2.36	11.5	0.32	7.05	0.07	23.08	0.03	0.06	10.39	0.28	0.63	0.01	97.33		5.88906	0.251605	1.921	0.0358595	0.835648	0.00840354	4.87666	0.00455589	0.0164882	1.87869	0.0155518	15.7335	2.11094	1.921	0	0.18994	0.645708	88.3074
	Orangeite (Group-2 kimberlite)	Impala, 20#Shaft	IP20-01_phl_xx4_co2	40.87	2.6	12.16	0.49	6.08	0.05	22.9	0.05	0.08	10.05	0.43	0.79	0.01	96.56		5.83371	0.279156	2.04564	0.0552987	0.725777	0.00604504	4.8729	0.00764693	0.02214	1.83008	0.0240523	15.7025	2.16629	2.04564	0	0.120651	0.605126	88.9536
	Orangeite (Group-2 kimberlite)	Impala, 20#Shaft	IP20-01_phl_xx4_rim1	41.73	1.83	9.99	0.11	8.52	0.09	23.12	0.03	0.05	10.22	0.14	0.39	0.01	96.23		5.9816	0.197312	1.68768	0.0124664	1.02133	0.010927	4.94048	0.00460752	0.0138959	1.86889	0.00786402	15.7471	2.0184	1.68768	0	0.330725	0.69061	87.7358
	Orangeite (Group-2 kimberlite)	Impala, 20#Shaft	IP20-01_phl_xx4_rim2	41.97	1.01	7.78	0.08	11.09	0.13	23.51	0.04	0.06	9.98	0.18	0.07	0.01	95.91		6.05779	0.109655	1.32346	0.00912944	1.33865	0.0158931	5.05871	0.00618603	0.0167909	1.83768	0.0101811	15.7841	1.94221	1.32346	0	0.618754	0.719893	87.5421
	Orangeite (Group-2 kimberlite)	Impala, 20#Shaft	IP20-01_phl_xx4_rim3	41.76	0.66	6.81	0.05	12.11	0.17	23.14	0.05	0.08	10.25	0.12	0.07	0	95.27		6.10117	0.0725319	1.17261	0.00577566	1.47964	0.0210373	5.03997	0.00782707	0.0226615	1.91047	0.00687039	15.8406	1.89883	1.17261	0	0.726221	0.753419	86.9952
	Orangeite (Group-2 kimberlite)	Impala, 20#Shaft	IP20-01_phl_xx4_rim4	41.64	0.42	6.55	0.07	12.34	0.13	23.68	0.03	0.07	10.16	0.12	0.09	0	95.3		6.08111	0.0461375	1.12738	0.00808256	1.50712	0.0160807	5.15544	0.00469429	0.0198206	1.89291	0.00686753	15.8656	1.91889	1.12738	0	0.791518	0.715598	87.8114
	Orangeite (Group-2 kimberlite)	Impala, 20#Shaft	IP20-01_phl_xx5_co1	41.09	2.81	12.93	0.17	5.56	0.08	23.5	0.06	0.08	9.91	0.5	1.01	0	97.7		5.79128	0.297905	2.14779	0.0189438	0.655349	0.00955031	4.93763	0.00906079	0.0218613	1.78187	0.0276157	15.6989	2.20872	2.14779	0	0.0609322	0.594417	89.255
	Orangeite (Group-2 kimberlite)	Impala, 20#Shaft	IP20-01_phl_xx5_co2	40.8	2.81	12.89	0.35	5.48	0.05	23.25	0.05	0.07	9.87	0.58	0.98	0	97.18		5.78429	0.299661	2.15377	0.0392317	0.649726	0.00600412	4.91389	0.00759516	0.0192413	1.78514	0.032223	15.6908	2.21571	2.15377	0	0.0619415	0.587785	89.3163
	Orangeite (Group-2 kimberlite)	Impala, 20#Shaft	IP20-01_phl_xx5_co3	41.26	2.65	12.96	0.25	5.02	0.06	23.54	0.03	0.08	9.98	0.54	1.03	0	97.4		5.82601	0.281463	2.15676	0.0279101	0.592796	0.007176	4.95519	0.00453879	0.0219018	1.79778	0.0298802	15.7014	2.17399	2.15676	0	0.0172253	0.575571	89.5933
	Orangeite (Group-2 kimberlite)	Impala, 20#Shaft	IP20-01_phl_xx5_rim1	41.52	0.38	8.84	0.07	10.5	0.13	23.25	0.09	0.07	10.03	0.05	0.08	0.01	95.02		6.05215	0.0416648	1.51866	0.00806732	1.27997	0.0160504	5.05228	0.0140563	0.0197832	1.86517	0.00285608	15.8707	1.94785	1.51866	0	0.429195	0.850779	85.5875
	Orangeite (Group-2 kimberlite)	Impala, 20#Shaft	IP20-01_phl_xx5_rim2	42.08	0.38	9.14	0.1	10.04	0.09	23.54	0.07	0.06	9.92	0.08	0.12	0.01	95.63		6.07702	0.0412792	1.55567	0.0114181	1.21257	0.011009	5.06796	0.0108315	0.0168002	1.82764	0.00452744	15.8367	1.92298	1.55567	0	0.367318	0.845256	85.7057
	Orangeite (Group-2 kimberlite)	Impala, 20#Shaft	IP20-01_phl_xx6_co1	40.78	2.71	12.62	0.49	5.97	0.03	23.31	0.02	0.07	10.24	0.42	0.84	0	97.5		5.76824	0.288336	2.10383	0.0547989	0.706204	0.00359424	4.91531	0.00303112	0.0191974	1.84783	0.0232806	15.7337	2.23176	2.10383	0	0.127923	0.578281	89.4735
	Orangeite (Group-2 kimberlite)	Impala, 20#Shaft	IP20-01_phl_xx6_co2	40.72	2.46	12.31	0.47	6.19	0.06	23.11	0.02	0.08	10.16	0.35	0.71	0	96.64		5.80596	0.263836	2.06862	0.0529838	0.738102	0.00724614	4.91223	0.00305544	0.0221158	1.8481	0.0195561	15.7418	2.19404	2.06862	0	0.125423	0.612679	88.9106
	Orangeite (Group-2 kimberlite)	Impala, 20#Shaft	IP20-01_phl_xx6_rim1	41.62	2.4	11.25	0.38	7.56	0.08	23.24	0.05	0.09	10.25	0.24	0.56	0	97.72		5.87305	0.254745	1.87098	0.0423959	0.89216	0.00956182	4.88888	0.00755976	0.0246236	1.84523	0.0132715	15.7225	2.12695	1.87098	0	0.255971	0.636189	88.4854
	Orangeite (Group-2 kimberlite)	Impala, 20#Shaft	IP20-01_phl_xx6_rim2	41.95	1.92	10.21	0.17	7.75	0.1	23.43	0.01	0.06	10.2	0.16	0.4	0.01	96.37		5.98426	0.206022	1.71656	0.0191737	0.92457	0.0120828	4.98268	0.00152846	0.016595	1.85628	0.0089443	15.7287	2.01574	1.71656	0	0.299177	0.625393	88.8483
	Orangeite (Group-2 kimberlite)	Impala, 20#Shaft	IP20-01_phl_xx7_co1	40.85	2.68	12.46	0.6	6.21	0.08	22.81	0.03	0.05	10.19	0.36	0.8	0	97.12		5.8039	0.286415	2.08642	0.0673997	0.737868	0.00962736	4.83131	0.00456694	0.0137735	1.847	0.0200437	15.7083	2.1961	2.08642	0	0.109684	0.628184	88.4937
	Orangeite (Group-2 kimberlite)	Impala, 20#Shaft	IP20-01_phl_xx7_co2	40.97	2.75	12.75	0.72	5.48	0.06	23.23	0.03	0.06	10.25	0.52	0.84	0	97.66		5.78085	0.291871	2.12027	0.0803225	0.646645	0.00717078	4.88638	0.00453548	0.0164144	1.84508	0.0287526	15.7083	2.21915	2.12027	0	0.0988794	0.547766	89.9199
	Orangeite (Group-2 kimberlite)	Impala, 20#Shaft	IP20-01_phl_xx7_co3	40.93	2.87	12.71	0.72	5.57	0.07	23.11	0.01	0.07	10.24	0.57	0.88	0	97.75		5.77612	0.304656	2.11396	0.0803353	0.65737	0.00836724	4.86191	0.00151207	0.0191531	1.84357	0.0315223	15.6985	2.22388	2.11396	0	0.10992	0.547449	89.8796
	Orangeite (Group-2 kimberlite)	Impala, 20#Shaft	IP20-01_phl_xx7_rim1	42.26	0.82	7.77	0.03	11.19	0.08	23.39	0.03	0.08	10.32	0.09	0.12	0.01	96.19		6.09326	0.0889338	1.32037	0.00341995	1.3493	0.00977011	5.02762	0.00463466	0.0223644	1.8983	0.00508523	15.8231	1.90674	1.32037	0	0.586371	0.762933	86.8245
	Orangeite (Group-2 kimberlite)	Impala, 20#Shaft	IP20-01_phl_xx7_rim2	42.56	0.84	7.84	0.01	11.45	0.12	23.28	0	0.06	10.23	0.12	0.11	0	96.62		6.11062	0.0907185	1.32665	0.00113517	1.37483	0.0145933	4.98286	0	0.0167025	1.8738	0.00675169	15.7987	1.88938	1.32665	0	0.562736	0.812093	85.9862
	Orangeite (Group-2 kimberlite)	Impala, 20#Shaft	IP20-01_phl_xx7_rim3	42.4	0.81	8.35	0.02	11.37	0.16	23.48	0.02	0.07	10.01	0.14	0.1	0	96.93		6.06387	0.0871369	1.40743	0.00226148	1.35989	0.0193818	5.00604	0.00306472	0.0194102	1.82635	0.00784621	15.8027	1.93613	1.40743	0	0.528703	0.831188	85.7606
	Orangeite (Group-2 kimberlite)	Impala, 20#Shaft	IP20-01_phl_xx7_rim4	42.68	0.56	9.68	0.06	10.4	0.13	23.95	0.01	0.05	10.31	0.16	0.05	0	98.04		6.02295	0.0594437	1.60996	0.00669445	1.22738	0.0155388	5.03851	0.00151203	0.0136805	1.85613	0.00884815	15.8606	1.97705	1.60996	0	0.367093	0.860283	85.416
	Orangeite (Group-2 kimberlite)	Impala, 20#Shaft	IP20-01_phl_xx8_co1	41.38	2.55	12.75	0.74	5.53	0.05	23.27	0.03	0.07	9.7	0.46	0.9	0.01	97.44		5.83567	0.270504	2.11917	0.0825109	0.652207	0.00597255	4.89225	0.00453313	0.0191402	1.74517	0.0254218	15.6526	2.16433	2.11917	0	0.0451544	0.607052	88.9613
	Orangeite (Group-2 kimberlite)	Impala, 20#Shaft	IP20-01_phl_xx8_co2	42.2	2.07	10.74	0.17	7.98	0.09	23.45	0.04	0.07	10.11	0.2	0.45	0	97.57		5.95204	0.219612	1.78531	0.0189575	0.941274	0.0107519	4.9307	0.00604491	0.0191425	1.81915	0.0110543	15.714	2.04796	1.78531	0	0.262652	0.678622	87.9019
	Orangeite (Group-2 kimberlite)	Impala, 20#Shaft	IP20-01_phl_xx8_co3	42.41	1.76	9.66	0.14	8.66	0.06	23.57	0.05	0.06	9.84	0.13	0.32	0.01	96.67		6.02587	0.188104	1.61765	0.0157275	1.02903	0.00722091	4.99256	0.00761199	0.0165291	1.78366	0.0072384	15.6912	1.97413	1.61765	0	0.356485	0.672547	88.1283
	Orangeite (Group-2 kimberlite)	Impala, 20#Shaft	IP20-01_phl_xx8_rim1	41.88	1.51	10.03	0.03	8.72	0.09	23.77	0.04	0.06	9.96	0.27	0.28	0	96.64		5.96804	0.161858	1.68454	0.00338007	1.03921	0.0108632	5.04971	0.00610748	0.0165777	1.81071	0.0150778	15.7661	2.03196	1.68454	0	0.347417	0.691788	87.9511
	Orangeite (Group-2 kimberlite)	Impala, 20#Shaft	IP20-01_phl_xx8_rim2	42.36	0.83	8.25	0.07	10.56	0.1	23.75	0.07	0.09	10.09	0.16	0.16	0	96.49		6.07177	0.0894892	1.3937	0.00793298	1.26585	0.0121408	5.07499	0.0107506	0.025012	1.84508	0.00898726	15.8057	1.92823	1.3937	0	0.534531	0.731321	87.4047
	Orangeite (Group-2 kimberlite)	Impala, 20#Shaft	IP20-01_phl_xx8_rim3	41.9	0.75	7.31	0.06	12.08	0.14	22.98	0.16	0.07	9.92	0.11	0.11	0.01	95.6		6.09435	0.0820555	1.2531	0.00689991	1.4694	0.0172477	4.98282	0.024935	0.0197405	1.84073	0.0062698	15.7976	1.90565	1.2531	0	0.652548	0.816852	85.9156
	Orangeite (Group-2 kimberlite)	Impala, 20#Shaft	IP20-01_phl_xx9_co1	41.19	2.7	12.49	0.59	5.56	0.03	23.4	0.03	0.07	10.27	0.4	0.79	0	97.52		5.80895	0.28642	2.07598	0.0657866	0.655753	0.00358358	4.91965	0.00453319	0.0191404	1.84774	0.0221062	15.7097	2.19105	2.07598	0	0.115063	0.540691	90.0979
	Orangeite (Group-2 kimberlite)	Impala, 20#Shaft	IP20-01_phl_xx9_co2	41.7	2.27	11.22	0.35	7.13	0.12	23.09	0.02	0.06	10.05	0.23	0.47	0	96.71		5.92561	0.242637	1.87908	0.0393228	0.847318	0.0144433	4.8914	0.00304512	0.0165309	1.82192	0.0128077	15.6941	2.07439	1.87908	0	0.195305	0.652014	88.2381
	Orangeite (Group-2 kimberlite)	Impala, 20#Shaft	IP20-01_phl_xx9_co3	41.87	1.81	9.65	0.11	9.16	0.09	23.44	0.03	0.05	10.19	0.17	0.28	0	96.85		5.96442	0.193944	1.62012	0.012389	1.09124	0.0108592	4.97777	0.00457892	0.0138097	1.85184	0.00948991	15.7505	2.03558	1.62012	0	0.415454	0.675787	88.0467
	Orangeite (Group-2 kimberlite)	Impala, 20#Shaft	IP20-01_phl_xx9_co4	41.36	1.21	9.09	0.09	9.48	0.1	24.05	0.25	0.06	9.8	0.24	0.21	0.01	95.95		5.9455	0.130836	1.54002	0.0102289	1.13966	0.0121758	5.15389	0.0385057	0.0167227	1.79721	0.0135197	15.7983	2.0545	1.54002	0	0.51448	0.625181	89.182
	Orangeite (Group-2 kimberlite)	Impala, 20#Shaft	IP20-01_phl_xx9_rim1	41.93	0.88	8.35	0.14	10.94	0.1	23.5	0.02	0.07	9.98	0.19	0.13	0.01	96.24		6.03682	0.0953014	1.41686	0.0159364	1.31723	0.0121948	5.04387	0.00308525	0.0195402	1.83307	0.0107198	15.8046	1.96318	1.41686	0	0.54632	0.770907	86.7423
	Orangeite (Group-2 kimberlite)	Impala, 20#Shaft	IP20-01_phl_xx9_rim2	41.62	0.65	7.67	0.09	11.86	0.13	23.21	0.03	0.07	9.67	0.17	0.11	0.01	95.29		6.06516	0.0712503	1.31732	0.0103696	1.44539	0.0160462	5.04229	0.00468423	0.0197781	1.79776	0.00970816	15.7998	1.93484	1.31732	0	0.617519	0.827869	85.897
	Orangeite (Group-2 kimberlite)	Impala, 20#Shaft	IP20-01_phl_xx9_rim3	41.41	0.76	6.77	0.04	13.33	0.11	22.8	0.05	0.05	10.03	0.14	0.1	0.01	95.6		6.05655	0.0836116	1.16698	0.0046255	1.63046	0.013627	4.97126	0.0078355	0.0141787	1.87148	0.00802408	15.8286	1.94345	1.16698	0	0.776473	0.853985	85.3399
	Orangeite (Group-2 kimberlite)	Impala, 20#Shaft	IP20-01_phl_xx9_rim4	41.73	0.57	6.63	0.04	13.28	0.2	23.21	0.07	0.06	9.65	0.1	0.07	0	95.61		6.08122	0.0624813	1.1387	0.00460873	1.61845	0.0246866	5.04231	0.0109299	0.0169528	1.79405	0.00571071	15.8001	1.91878	1.1387	0	0.780076	0.838376	85.7436
	Orangeite (Group-2 kimberlite)	Impala, 20#Shaft	IP20-03_phl_xx1_co1	38.17	1.41	12.08	0.01	10.06	0.11	20.82	0.02	0.05	10.16	0.39	0.25	0.01	93.54		5.73157	0.159259	2.13783	0.00118722	1.26331	0.0139905	4.66062	0.00321779	0.0145569	1.9463	0.022949	15.9548	2.26843	2.13783	0	0.1306	1.13271	80.4481
	Orangeite (Group-2 kimberlite)	Impala, 20#Shaft	IP20-03_phl_xx1_co2	38.18	1.4	11.8	0.01	10.84	0.12	20.56	0.04	0.06	9.97	0.46	0.24	0	93.68		5.73879	0.158287	2.09036	0.0011884	1.36262	0.0152776	4.60702	0.00644201	0.0174857	1.91181	0.0270951	15.9364	2.26121	2.09036	0	0.170846	1.19177	79.4479
	Orangeite (Group-2 kimberlite)	Impala, 20#Shaft	IP20-03_phl_xx1_co3	39.32	1.28	11.57	0.04	5.88	0.07	23.47	0.08	0.1	10.16	0.42	0.43	0	92.82		5.83083	0.142778	2.02211	0.00468982	0.729212	0.00879234	5.1885	0.0127111	0.0287517	1.9221	0.024407	15.9149	2.16917	2.02211	0	0.147056	0.582156	89.9118
	Orangeite (Group-2 kimberlite)	Impala, 20#Shaft	IP20-03_phl_xx1_co4	39.59	1.36	11.47	0.02	5.86	0.07	23.69	0.02	0.11	10.19	0.53	0.39	0	93.3		5.83708	0.150828	1.9931	0.00233141	0.722549	0.00874173	5.207	0.00315949	0.0314449	1.91668	0.030622	15.9035	2.16292	1.9931	0	0.169822	0.552727	90.4036
	Orangeite (Group-2 kimberlite)	Impala, 20#Shaft	IP20-03_phl_xx1_co5	38.82	1.26	11.17	0.14	7.44	0.08	23.02	0.03	0.1	10.2	0.52	0.29	0	93.07		5.77952	0.141104	1.95995	0.0164795	0.926336	0.0100882	5.10921	0.00478557	0.0288658	1.93732	0.030338	15.944	2.22048	1.95995	0	0.260534	0.665802	88.471
	Orangeite (Group-2 kimberlite)	Impala, 20#Shaft	IP20-03_phl_xx1_co6	39.72	0.76	7.36	0.02	10.76	0.07	23.64	0.02	0.09	10.14	0.32	0.33	0.01	93.24		5.93706	0.0854494	1.29657	0.00236359	1.34504	0.00886237	5.26771	0.00320309	0.0260827	1.93359	0.0187439	15.9247	2.06294	1.29657	0	0.76637	0.578667	90.1021
	Orangeite (Group-2 kimberlite)	Impala, 20#Shaft	IP20-03_phl_xx1_co7	39.37	0.67	6.63	0.04	11.1	0.08	23.56	0.04	0.08	10.03	0.23	0.22	0	92.05		5.95482	0.0762275	1.18188	0.00478346	1.40406	0.010249	5.3124	0.00648247	0.0234607	1.93539	0.0136326	15.9234	2.04518	1.18188	0	0.863298	0.540763	90.7612
	Orangeite (Group-2 kimberlite)	Impala, 20#Shaft	IP20-03_phl_xx1_rim1	40.06	0.08	1.18	0.06	15.77	0.08	24.39	0	0.13	10	0.14	0.12	0	92.01		6.11873	0.00919122	0.212416	0.0072457	2.01438	0.0103497	5.5536	0	0.0384982	1.94857	0.00837965	15.9214	1.88127	0.212416	0	1.66885	0.345527	94.1427
	Orangeite (Group-2 kimberlite)	Impala, 20#Shaft	IP20-03_phl_xx1_rim2	39.87	0.08	1.33	0.05	15.85	0.09	24.44	0.02	0.17	10.11	0.19	0.18	0	92.38		6.08043	0.00917722	0.239054	0.00602889	2.02152	0.0116257	5.5565	0.0032681	0.0502672	1.967	0.0113551	15.9562	1.91957	0.239054	0	1.68051	0.341001	94.2179
	Orangeite (Group-2 kimberlite)	Impala, 20#Shaft	IP20-03_phl_xx1_rim3	40.05	0.07	1.61	0.07	15.87	0.08	24.2	0.03	0.15	9.99	0.13	0.14	0.01	92.4		6.10011	0.00801985	0.289012	0.0084297	2.02149	0.0103208	5.49494	0.00489591	0.0442969	1.94118	0.00775936	15.9304	1.89989	0.289012	0	1.61088	0.410612	93.047
	Orangeite (Group-2 kimberlite)	Impala, 20#Shaft	IP20-03_phl_xx1_rim4	39.76	0.06	1.89	0.01	15.37	0.09	24.28	0.04	0.13	10.15	0.15	0.12	0	92.05		6.07549	0.00689635	0.340371	0.00120813	1.96412	0.0116484	5.5309	0.00654895	0.0385146	1.97864	0.00898202	15.9633	1.92451	0.340371	0	1.58413	0.379989	93.5714
	Orangeite (Group-2 kimberlite)	Impala, 20#Shaft	IP20-03_phl_xx2_co1	38.68	1.3	12.32	1.38	4.48	0.06	23.21	0.02	0.13	10.2	0.41	0.32	0.01	92.52		5.73769	0.145053	2.15385	0.161848	0.555761	0.0075386	5.1326	0.00317876	0.0373887	1.93026	0.0238332	15.889	2.26231	2.15385	0	0.108459	0.447302	91.9837
	Orangeite (Group-2 kimberlite)	Impala, 20#Shaft	IP20-03_phl_xx2_co2	38.43	1.2	12.12	1.14	4.74	0.03	23.13	0.01	0.13	10.43	0.4	0.34	0.01	92.11		5.74038	0.134829	2.13368	0.134634	0.592118	0.00379561	5.15061	0.00160047	0.0376497	1.98756	0.0234141	15.9403	2.25962	2.13368	0	0.12594	0.466178	91.7003
	Orangeite (Group-2 kimberlite)	Impala, 20#Shaft	IP20-03_phl_xx2_rim1	38.65	0.36	1.09	0.08	17.04	0.14	23.81	0.02	0.1	10	0.32	0.23	0	91.84		5.97768	0.0418811	0.198685	0.00978255	2.204	0.01834	5.48977	0.00331428	0.0299868	1.97309	0.0193946	15.9659	2.02232	0.198685	0	1.82364	0.380363	93.5204
	Orangeite (Group-2 kimberlite)	Impala, 20#Shaft	IP20-03_phl_xx2_rim2	39.27	0.16	1.38	0.05	16.29	0.09	23.98	0.03	0.11	10.04	0.24	0.19	0	91.83		6.04584	0.0185289	0.250398	0.00608618	2.09738	0.0117362	5.50373	0.00494873	0.0328349	1.97194	0.0144795	15.9579	1.95416	0.250398	0	1.70376	0.393612	93.3256
	Orangeite (Group-2 kimberlite)	Impala, 20#Shaft	IP20-03_phl_xx2_rim3	39.37	0.11	1.63	0.06	16.08	0.14	24	0.02	0.12	9.98	0.24	0.19	0	91.94		6.04889	0.0127127	0.295157	0.00728854	2.06612	0.0182191	5.4971	0.00329244	0.0357469	1.95617	0.0144501	15.9552	1.95111	0.295157	0	1.65595	0.410173	93.0565
	Orangeite (Group-2 kimberlite)	Impala, 20#Shaft	IP20-03_phl_xx3_co1	39.41	1.33	11.77	0.18	5.11	0.04	24.01	0	0.1	10.21	0.46	0.34	0	92.96		5.81022	0.147493	2.04511	0.0209815	0.630037	0.004995	5.27704	0	0.0285847	1.92033	0.0265761	15.9114	2.18978	2.04511	0	0.14467	0.485368	91.577
	Orangeite (Group-2 kimberlite)	Impala, 20#Shaft	IP20-03_phl_xx3_co2	40.09	1.25	11.83	0.17	5.19	0.04	24.13	0.03	0.1	10.26	0.42	0.28	0.01	93.8		5.85044	0.137213	2.03466	0.0196147	0.633402	0.00494427	5.24955	0.00469084	0.0282944	1.91014	0.0240187	15.897	2.14956	2.03466	0	0.114893	0.518509	91.0107
	Orangeite (Group-2 kimberlite)	Impala, 20#Shaft	IP20-03_phl_xx3_rim1	39.24	1.25	11.6	0.15	5.27	0.02	23.72	0.01	0.09	10.33	0.42	0.36	0	92.46		5.82642	0.13961	2.02996	0.0176094	0.6544	0.00251532	5.25049	0.00159093	0.0259097	1.95676	0.0244383	15.9297	2.17358	2.02996	0	0.14362	0.510781	91.1342
	Orangeite (Group-2 kimberlite)	Impala, 20#Shaft	IP20-03_phl_xx3_rim2	39.9	0.99	7.63	0	10.4	0.1	23.57	0.01	0.12	10.18	0.3	0.27	0	93.47		5.93604	0.110788	1.33784	0	1.29395	0.0126012	5.22752	0.00159405	0.034614	1.93213	0.0174901	15.9046	2.06396	1.33784	0	0.726121	0.567827	90.202
	Orangeite (Group-2 kimberlite)	Impala, 20#Shaft	IP20-03_phl_xx3_rim3	39.7	0.38	3.57	0.01	14.75	0.1	23.74	0.07	0.1	9.83	0.26	0.29	0.01	92.81		6.02041	0.0433463	0.638057	0.00119899	1.87063	0.0128447	5.36696	0.0113739	0.0294024	1.90175	0.015451	15.9114	1.97959	0.638057	0	1.34153	0.529095	91.0263
	Orangeite (Group-2 kimberlite)	Impala, 20#Shaft	IP20-03_phl_xx3_rim4	39.57	0.3	1.03	0.09	16.21	0.13	25.19	0.06	0.09	8.8	0.32	0.1	0	91.89		6.02404	0.0343539	0.184805	0.0108329	2.06378	0.0167631	5.71692	0.009787	0.0265651	1.70911	0.0190906	15.816	1.97596	0.184805	0	1.79116	0.272628	95.4483
	Orangeite (Group-2 kimberlite)	Impala, 20#Shaft	IP20-03_phl_xx3_rim5	39.34	0.14	1.13	0.06	16.75	0.08	24.42	0.12	0.12	9.71	0.23	0.14	0.01	92.25		6.01975	0.0161141	0.203788	0.00725896	2.14348	0.0103687	5.5706	0.0196744	0.0356019	1.89552	0.0137918	15.9359	1.98025	0.203788	0	1.77646	0.367013	93.8188
	Evolved Orangeite (Group-2 kimberlite)	Impala, 20#Shaft	IP20-02_phl_xx1_co1	35.56	2.36	14.25	0.06	21.67	0.51	9.48	0.02	0.29	9.68	0.14	0.95	0.03	95		5.66567	0.282836	2.67584	0.00755822	2.8874	0.0688254	2.2517	0.00341425	0.0895848	1.96757	0.00874108	15.9091	2.33433	2.33433	0.341501	0	3.22891	41.0848
	Evolved Orangeite (Group-2 kimberlite)	Impala, 20#Shaft	IP20-02_phl_xx1_co2	35.91	2.36	14.29	0	21.65	0.49	9.65	0.05	0.32	9.66	0.12	1	0.03	95.53		5.68313	0.280942	2.66538	0	2.86543	0.0656837	2.27673	0.0084785	0.0981905	1.95036	0.0074422	15.9018	2.31687	2.31687	0.348513	0	3.21394	41.4654
	Evolved Orangeite (Group-2 kimberlite)	Impala, 20#Shaft	IP20-02_phl_xx1_co3	35.84	2.42	14.12	0.03	21.55	0.49	9.42	0.03	0.43	9.6	0.11	0.91	0.03	94.98		5.70027	0.289518	2.64678	0.00377249	2.86638	0.0660104	2.23352	0.00511241	0.1326	1.94789	0.00685595	15.8987	2.29973	2.29973	0.347045	0	3.21343	41.005
	Evolved Orangeite (Group-2 kimberlite)	Impala, 20#Shaft	IP20-02_phl_xx1_co4	38.79	2.12	11.59	0.79	5.68	0.03	23.11	0.02	0.13	10.26	0.4	0.38	0	93.3		5.72091	0.235187	2.01458	0.0921195	0.700573	0.00374762	5.0811	0.00316047	0.0371737	1.93045	0.0231181	15.8421	2.27909	2.01458	0	0.264513	0.43606	92.0963
	Evolved Orangeite (Group-2 kimberlite)	Impala, 20#Shaft	IP20-02_phl_xx1_rim1	39.26	2.06	11.46	0.21	5.61	0.03	23.41	0.03	0.12	10.21	0.37	0.47	0.01	93.25		5.78455	0.228307	1.99003	0.0244635	0.691261	0.00374395	5.14201	0.00473606	0.0342806	1.91916	0.0213633	15.8439	2.21545	1.99003	0	0.225419	0.465842	91.693
	Evolved Orangeite (Group-2 kimberlite)	Impala, 20#Shaft	IP20-02_phl_xx1_rim2	39.11	2.08	11.23	0.19	5.82	0.04	23.39	0	0.14	10.34	0.35	0.45	0	93.14		5.77536	0.23104	1.95446	0.0221832	0.718744	0.00500312	5.14913	0	0.0400836	1.94795	0.0202538	15.8642	2.22464	1.95446	0	0.27018	0.448564	91.9866
	Evolved Orangeite (Group-2 kimberlite)	Impala, 20#Shaft	IP20-02_phl_xx1_rim3	38.88	2.36	8.48	0.03	11.71	0.13	21.09	0.02	0.11	10.01	0.38	0.41	0	93.61		5.83658	0.266488	1.50032	0.00356067	1.47011	0.0165297	4.71977	0.00321691	0.0320164	1.91704	0.0223544	15.788	2.16342	1.50032	0	0.663106	0.806999	85.3984
	Evolved Orangeite (Group-2 kimberlite)	Impala, 20#Shaft	IP20-02_phl_xx1_co1	39.08	2.57	9.21	0.01	9.49	0.1	22.31	0.08	0.12	9.64	0.43	0.41	0	93.45		5.80622	0.287214	1.6127	0.00117468	1.17914	0.0125843	4.94141	0.0127352	0.0345675	1.82718	0.0250354	15.74	2.19378	1.6127	0	0.581076	0.598063	89.2036
	Evolved Orangeite (Group-2 kimberlite)	Impala, 20#Shaft	IP20-02_phl_xx1_co2	39.61	2.65	10.11	0.01	8.71	0.03	22.69	0.08	0.13	9.8	0.62	0.5	0	94.94		5.78859	0.291304	1.7413	0.00115544	1.0645	0.00371346	4.94327	0.0125266	0.0368348	1.82708	0.0355064	15.7458	2.21141	1.7413	0	0.470111	0.594389	89.2664
	Evolved Orangeite (Group-2 kimberlite)	Impala, 20#Shaft	IP20-02_phl_xx1_rim1	39.52	2.46	10.5	0.01	8.14	0.05	22.77	0.09	0.13	9.71	0.6	0.46	0	94.44		5.79219	0.271203	1.81372	0.00115879	0.997722	0.00620704	4.97509	0.0141333	0.0369416	1.81556	0.0344607	15.7584	2.20781	1.81372	0	0.394095	0.603627	89.1798
	Evolved Orangeite (Group-2 kimberlite)	Impala, 20#Shaft	IP20-02_phl_xx1_rim3	39.38	2.72	10.03	0.01	9.71	0.08	22.53	0.05	0.11	10.02	0.62	0.47	0	95.73		5.73658	0.298043	1.722	0.00115175	1.18292	0.0098709	4.89272	0.00780412	0.0310683	1.86213	0.0353929	15.7797	2.26342	1.722	0	0.541418	0.641505	88.4084
	Evolved Orangeite (Group-2 kimberlite)	Impala, 20#Shaft	IP20-02_phl_xx1_rim4	39.69	1.67	7.31	0	13.12	0.14	22.55	0.1	0.1	9.16	0.38	0.32	0.01	94.55		5.87679	0.185998	1.27565	0	1.62462	0.0175581	4.97757	0.0158648	0.0287082	1.73029	0.0220491	15.7551	2.12321	1.27565	0	0.84756	0.777063	86.4968
	Evolved Orangeite (Group-2 kimberlite)	Impala, 20#Shaft	IP20-02_phl_xx1_rim5	39.26	1.34	4.83	0.01	18.86	0.27	20.06	0.17	0.12	9.04	0.19	0.3	0	94.45		5.95572	0.152905	0.863548	0.0011994	2.39268	0.0346926	4.53656	0.0276318	0.0352949	1.74951	0.011295	15.761	2.04428	0.863548	0	1.18074	1.21195	78.9172
	Evolved Orangeite (Group-2 kimberlite)	Impala, 20#Shaft	IP20-02_phl_xx2_co1	38.87	2.58	9.47	0	9.47	0.08	21.79	0.02	0.09	10.12	0.57	0.47	0	93.53		5.80119	0.289638	1.66574	0	1.18199	0.0101131	4.84811	0.00319823	0.0260431	1.92685	0.0333369	15.7862	2.19881	1.66574	0	0.533062	0.648924	88.195
	Evolved Orangeite (Group-2 kimberlite)	Impala, 20#Shaft	IP20-02_phl_xx2_co2	38.98	2.37	9.37	0.03	9.73	0.09	22.07	0.03	0.12	10.09	0.47	0.53	0	93.88		5.79878	0.265202	1.64282	0.00352854	1.21051	0.0113404	4.89451	0.00478182	0.0346117	1.91492	0.0273994	15.8084	2.20122	1.64282	0	0.558397	0.65211	88.2431
	Evolved Orangeite (Group-2 kimberlite)	Impala, 20#Shaft	IP20-02_phl_xx2_co3	38.21	2.37	8.83	0	10.04	0.07	21.32	0.04	0.11	9.87	0.53	0.46	0.01	91.86		5.8198	0.271527	1.58507	0	1.27886	0.00903064	4.84095	0.00652782	0.0324841	1.91784	0.0316341	15.7937	2.1802	1.58507	0	0.595129	0.683736	87.624
	Evolved Orangeite (Group-2 kimberlite)	Impala, 20#Shaft	IP20-02_phl_xx2_rim1	36.23	2.47	3.04	0.02	27.11	0.77	12.36	0.06	0.29	9.3	0.43	0.15	0.01	92.24		5.9359	0.304402	0.587012	0.00259076	3.71456	0.106856	3.0189	0.0105329	0.092122	1.94386	0.027608	15.7443	2.0641	0.587012	0	1.47709	2.23747	57.4332
	Evolved Orangeite (Group-2 kimberlite)	Impala, 20#Shaft	IP20-02_phl_xx2_rim2	35.77	2.87	3.11	0	28.49	0.84	12.06	0.05	0.24	9.16	0.5	0.1	0	93.19		5.82788	0.351727	0.597183	0	3.88189	0.11592	2.92921	0.00872847	0.0758141	1.90393	0.0319234	15.7242	2.17212	0.597183	0	1.57494	2.30695	55.942
	Evolved Orangeite (Group-2 kimberlite)	Impala, 20#Shaft	IP20-02_phl_xx2_rim3	36.53	2.47	3.21	0.01	26.92	0.82	13.4	0.05	0.2	9.28	0.39	0.09	0	93.37		5.88089	0.299105	0.609051	0.00127283	3.62433	0.111814	3.21596	0.00862462	0.0624267	1.90593	0.024604	15.744	2.11911	0.609051	0	1.51006	2.11427	60.3344
	Evolved Orangeite (Group-2 kimberlite)	Impala, 20#Shaft	IP20-02_phl_xx2_rim4	36.22	2.23	3.14	0.02	25.47	0.83	14.07	0.04	0.2	9.34	0.35	0.11	0	92.02		5.88839	0.272701	0.601635	0.00257073	3.46287	0.114292	3.41	0.00696763	0.0630413	1.93714	0.0222979	15.7819	2.11161	0.601635	0	1.50997	1.9529	63.585
	Evolved Orangeite (Group-2 kimberlite)	Impala, 20#Shaft	IP20-02_phl_xx2_rim5	36.71	1.8	3.27	0.02	24.73	0.78	14.86	0.07	0.14	9.42	0.37	0.15	0.01	92.33		5.92573	0.218556	0.622101	0.00255251	3.33842	0.106645	3.57593	0.0121069	0.043816	1.93987	0.0234049	15.8091	2.07427	0.622101	0	1.45216	1.88626	65.4669
	Evolved Orangeite (Group-2 kimberlite)	Impala, 20#Shaft	IP20-02_phl_xx2_rim6	37.15	1.54	3.16	0.03	24.6	0.82	15.23	0.09	0.12	9.31	0.43	0.18	0	92.66		5.96556	0.186014	0.598046	0.00380884	3.3036	0.111531	3.6459	0.015485	0.0373612	1.90725	0.0270588	15.8016	2.03444	0.598046	0	1.43639	1.8672	66.1315
	Evolved Orangeite (Group-2 kimberlite)	Impala, 20#Shaft	IP20-02_phl_xx3_co1	38.75	2.34	6.7	0.02	12.56	0.11	22.3	0.1	0.13	8.92	0.44	0.42	0	92.79		5.83671	0.265122	1.1894	0.0023818	1.58214	0.0140339	5.00742	0.0161389	0.0379653	1.71406	0.0259715	15.6913	2.16329	1.1894	0	0.97389	0.608254	89.1686
	Evolved Orangeite (Group-2 kimberlite)	Impala, 20#Shaft	IP20-02_phl_xx3_co2	38.84	2.12	6.73	0.01	13.06	0.11	21.52	0.1	0.13	9.23	0.36	0.37	0.01	92.59		5.88725	0.241714	1.20228	0.00119843	1.65553	0.0141226	4.86282	0.0162409	0.0382053	1.78484	0.0213837	15.7256	2.11275	1.20228	0	0.91047	0.745057	86.7141
	Evolved Orangeite (Group-2 kimberlite)	Impala, 20#Shaft	IP20-02_phl_xx3_rim1	35.46	2.7	3.19	0	29.93	0.81	12.09	0.15	0.24	8.69	0.72	0.09	0	94.07		5.75182	0.32943	0.609836	0	4.06007	0.111286	2.92351	0.0260696	0.0754788	1.79826	0.0457664	15.7315	2.24818	0.609836	0	1.63834	2.42172	54.6938
	Evolved Orangeite (Group-2 kimberlite)	Impala, 20#Shaft	IP20-02_phl_xx3_rim2	34.94	2.79	3.23	0	28.78	0.85	11.95	0.15	0.2	8.82	0.72	0.18	0	92.61		5.75512	0.345675	0.627031	0	3.96444	0.118588	2.93435	0.0264728	0.0638717	1.85338	0.0464741	15.7354	2.24488	0.627031	0	1.61785	2.34658	55.5649
	Evolved Orangeite (Group-2 kimberlite)	Impala, 20#Shaft	IP20-02_phl_xx3_rim3	36.23	2.24	3.14	0	25.84	0.8	14.3	0.12	0.19	9.14	0.53	0.06	0.01	92.6		5.85552	0.272319	0.598112	0	3.49261	0.109516	3.44545	0.0207805	0.0595386	1.88455	0.0335677	15.772	2.14448	0.598112	0	1.54636	1.94624	63.9029
	Evolved Orangeite (Group-2 kimberlite)	Impala, 20#Shaft	IP20-02_phl_xx4_co1	39.19	2.11	11.32	0.06	6.21	0.06	23.26	0.02	0.12	10.18	0.5	0.52	0	93.55		5.77651	0.233941	1.96649	0.00699231	0.765493	0.00749084	5.11107	0.00315862	0.034294	1.91427	0.0288807	15.8486	2.22349	1.96649	0	0.257001	0.508493	90.9514
	Evolved Orangeite (Group-2 kimberlite)	Impala, 20#Shaft	IP20-02_phl_xx4_co3	39.16	2.11	11.02	0.06	6.2	0.01	23.41	0.05	0.09	10.1	0.53	0.53	0.01	93.28		5.78449	0.234443	1.91849	0.00700733	0.765903	0.00125116	5.15509	0.00791351	0.0257758	1.90331	0.0306793	15.8343	2.21551	1.91849	0	0.297019	0.468884	91.6628
	Evolved Orangeite (Group-2 kimberlite)	Impala, 20#Shaft	IP20-02_phl_xx4_co2	38.83	2.54	9.79	0.03	9.18	0.1	22.04	0.02	0.09	9.81	0.46	0.51	0	93.4		5.78569	0.284678	1.7192	0.00353417	1.1439	0.0126205	4.89566	0.00319297	0.0260002	1.86475	0.0268592	15.7661	2.21431	1.7192	0	0.495116	0.648789	88.2984
	Evolved Orangeite (Group-2 kimberlite)	Impala, 20#Shaft	IP20-02_phl_xx4_rim1	38.65	1.31	6.14	0.01	16.46	0.18	19.94	0.02	0.09	9.72	0.2	0.4	0	93.12		5.93473	0.151306	1.11116	0.00121403	2.11369	0.0234107	4.56446	0.00329047	0.0267942	1.90407	0.0120345	15.8462	2.06527	1.11116	0	0.954111	1.15958	79.7419
	Evolved Orangeite (Group-2 kimberlite)	Impala, 20#Shaft	IP20-02_phl_xx4_rim2	37.63	1.04	3.54	0.01	23.59	0.82	16.95	0.02	0.08	9.65	0.38	0.1	0.01	93.82		5.92659	0.123207	0.657097	0.00124523	3.10712	0.109389	3.97972	0.00337503	0.0244291	1.93893	0.0234532	15.8946	2.07341	0.657097	0	1.41631	1.69081	70.1826
	Evolved Orangeite (Group-2 kimberlite)	Impala, 20#Shaft	IP20-02_phl_xx4_rim3	36.16	1.44	2.05	0.01	32.81	1.13	10.33	0.13	0.23	9.22	0.14	0.17	0.01	93.83		5.97531	0.178989	0.399247	0.0013065	4.53417	0.158161	2.54475	0.0230172	0.0736897	1.94369	0.00906583	15.8414	2.02469	0.399247	0	1.62544	2.90873	46.6629
	Evolved Orangeite (Group-2 kimberlite)	Sibanye, Karee-3 Shaft	LM_5_phl_1_core_1	38.94	2.84	12.04	0.42	6.32	0.08	22.82	0.01	0.09	10.08	0.55	0.96	0	95.15		5.67609	0.31139	2.0684	0.048404	0.770424	0.00987717	4.95885	0.00156182	0.0254357	1.87447	0.0314169	15.7763	2.32391	2.0684	0	0.255511	0.514913	90.5931
	Evolved Orangeite (Group-2 kimberlite)	Sibanye, Karee-3 Shaft	LM_5_phl_1_core_2	39.26	2.76	11.98	0.45	6.65	0.05	22.66	0.03	0.1	10.16	0.57	0.91	0.01	95.59		5.70303	0.301577	2.05101	0.0516829	0.807861	0.00615198	4.90713	0.00466932	0.0281645	1.88284	0.0324473	15.7766	2.29697	2.05101	0	0.245958	0.561903	89.7257
	Evolved Orangeite (Group-2 kimberlite)	Sibanye, Karee-3 Shaft	LM_5_phl_1_core_3	39.77	3.01	11.62	0.14	6.94	0.04	22.66	0.06	0.1	10.16	0.66	0.98	0	96.14		5.74694	0.327175	1.97899	0.0159951	0.838688	0.00489588	4.8815	0.00928986	0.0280174	1.87301	0.0373743	15.7419	2.25306	1.97899	0	0.274073	0.564614	89.6327
	Evolved Orangeite (Group-2 kimberlite)	Sibanye, Karee-3 Shaft	LM_5_phl_1_rim_4	39.5	2.98	9.91	0.01	10.67	0.1	20.85	0.07	0.1	10.04	0.48	0.66	0.01	95.38		5.81455	0.329965	1.71928	0.00116385	1.31354	0.0124683	4.57548	0.0110406	0.0285408	1.88546	0.027689	15.7192	2.18545	1.71928	0	0.466169	0.847369	84.3741
	Evolved Orangeite (Group-2 kimberlite)	Sibanye, Karee-3 Shaft	LM_5_phl_1_rim_5	39.32	3.26	9.43	0	13.42	0.1	19.45	0.08	0.09	9.86	0.47	0.61	0	96.09		5.80378	0.361949	1.64045	0	1.65657	0.0125022	4.27985	0.0126521	0.0257565	1.85669	0.0271858	15.6774	2.19622	1.64045	0	0.55577	1.1008	79.5415
	Evolved Orangeite (Group-2 kimberlite)	Sibanye, Karee-3 Shaft	LM_5_phl_1_rim_6	37.61	3.77	8.55	0	18.27	0.23	15.87	0.11	0.11	9.74	0.46	0.48	0	95.2		5.74133	0.432896	1.53826	0	2.33242	0.029739	3.61159	0.017992	0.0325573	1.89685	0.0275178	15.6611	2.25867	1.53826	0	0.720413	1.61201	69.1399
	Evolved Orangeite (Group-2 kimberlite)	Sibanye, Karee-3 Shaft	LM_5_phl_2_core_1	39.46	3.03	11.53	0.19	7.67	0.09	22.41	0.09	0.13	10.05	0.55	0.87	0	96.07		5.71378	0.330021	1.96766	0.021752	0.928798	0.0110382	4.83749	0.0139632	0.036497	1.85651	0.0312088	15.7487	2.28622	1.96766	0	0.31856	0.610237	88.7983
	Evolved Orangeite (Group-2 kimberlite)	Sibanye, Karee-3 Shaft	LM_5_phl_3_core_1	40	1.57	12.9	1.75	4.43	0.01	23.35	0.15	0.2	10.17	0.29	0.55	0	95.37		5.75451	0.169895	2.18723	0.199052	0.532981	0.00121853	5.00781	0.0231215	0.0557861	1.86653	0.0163491	15.8145	2.24549	2.18723	0	0.0582601	0.474721	91.3412
	Evolved Orangeite (Group-2 kimberlite)	Sibanye, Karee-3 Shaft	LM_5_phl_3_core_2	39.95	1.63	13.05	1.77	4.58	0.06	23.43	0.14	0.22	10.1	0.3	0.58	0.01	95.82		5.72578	0.175727	2.20437	0.200572	0.548963	0.0072838	5.00613	0.0214992	0.0611347	1.84673	0.0168495	15.815	2.27422	2.20437	0	0.0698579	0.479105	91.2656
	Evolved Orangeite (Group-2 kimberlite)	Sibanye, Karee-3 Shaft	LM_5_phl_3_rim_3	39.74	2.66	12.39	0.74	5.86	0.05	23.28	0.17	0.16	10.14	0.62	0.81	0.01	96.63		5.6867	0.286317	2.08958	0.0837226	0.701277	0.00606026	4.96623	0.026065	0.0443914	1.85112	0.0347673	15.7762	2.3133	2.08958	0	0.223726	0.477551	91.2276
	Evolved Orangeite (Group-2 kimberlite)	Sibanye, Karee-3 Shaft	LM_5_phl_3_rim_4	39.51	2.76	12.38	0.52	6	0.03	23.22	0.2	0.15	9.98	0.49	0.96	0	96.2		5.6803	0.298474	2.09768	0.059108	0.721398	0.00365321	4.97666	0.0308085	0.0418121	1.83046	0.0276063	15.768	2.3197	2.09768	0	0.222021	0.499377	90.8807
	Evolved Orangeite (Group-2 kimberlite)	Sibanye, Karee-3 Shaft	LM_5_phl_3_rim_5	40.04	2.89	11.87	0.18	6.85	0.03	22.72	0.2	0.16	9.96	0.59	0.95	0	96.44		5.75705	0.312563	2.01146	0.0204624	0.823676	0.00365356	4.86997	0.0308115	0.0446039	1.82697	0.0332434	15.7345	2.24295	2.01146	0	0.231485	0.59219	89.1583
	Evolved Orangeite (Group-2 kimberlite)	Sibanye, Karee-3 Shaft	LM_5_phl_4_core_1	39.72	3.03	11.28	0.05	8.54	0.08	22.19	0.04	0.1	10.24	0.45	0.79	0	96.51		5.73667	0.329174	1.92006	0.00570952	1.0315	0.00978655	4.77771	0.00618995	0.0280025	1.88675	0.0254689	15.757	2.26333	1.92006	0	0.343275	0.688222	87.4089
	Evolved Orangeite (Group-2 kimberlite)	Sibanye, Karee-3 Shaft	LM_5_phl_4_core_2	40.35	2.8	10.92	0.07	9.1	0.09	22.15	0.05	0.09	10.16	0.41	0.79	0	96.98		5.80205	0.302851	1.85062	0.00795821	1.09431	0.0109615	4.74815	0.00770345	0.0250916	1.86379	0.0231031	15.7366	2.19795	1.85062	0	0.34733	0.746978	86.4065
	Evolved Orangeite (Group-2 kimberlite)	Sibanye, Karee-3 Shaft	LM_5_phl_4_rim_3	38.26	3.59	6.87	0	20.96	0.26	15.26	0.1	0.13	9.64	0.37	0.38	0.01	95.83		5.84058	0.412229	1.23601	0	2.67585	0.0336181	3.47278	0.0163564	0.038477	1.87738	0.022134	15.6254	2.15942	1.23601	0	0.923412	1.75244	66.4619
	Evolved Orangeite (Group-2 kimberlite)	Sibanye, Karee-3 Shaft	LM_5_phl_4_rim_4	36.2	4.39	4.69	0	29.97	0.43	9.28	0.2	0.27	9.14	0.41	0.23	0.01	95.22		5.8095	0.529942	0.887072	0	4.02232	0.0584505	2.22019	0.0343904	0.084012	1.87129	0.0257847	15.543	2.1905	0.887072	0	1.30343	2.7189	44.9515
	Evolved Orangeite (Group-2 kimberlite)	Sibanye, Karee-3 Shaft	LM_5_phl_4_rim_5	35.97	4.83	4.34	0.02	30.15	0.45	9.05	0.2	0.34	8.87	0.38	0.17	0.01	94.78		5.79135	0.584952	0.82354	0.00254594	4.05963	0.0613679	2.1722	0.0345022	0.106137	1.82192	0.0239757	15.4821	2.20865	0.82354	0	1.38511	2.67453	44.8179
	Evolved Orangeite (Group-2 kimberlite)	Sibanye, Karee-3 Shaft	LM_5_phl_5_core_1	39.69	2.96	9.96	0.01	10.34	0.12	21.53	0.03	0.11	10.12	0.4	0.7	0	95.97		5.79254	0.324947	1.71318	0.0011539	1.26202	0.014834	4.68429	0.00469122	0.0311263	1.88423	0.0228768	15.7359	2.20746	1.71318	0	0.494286	0.767738	85.9183
	Evolved Orangeite (Group-2 kimberlite)	Sibanye, Karee-3 Shaft	LM_5_phl_5_core_2	39.78	2.87	10.57	0.01	9.34	0.07	21.86	0.04	0.09	10.11	0.37	0.77	0.01	95.89		5.79135	0.314289	1.81362	0.00115105	1.13716	0.00863182	4.74436	0.00623953	0.0254041	1.87772	0.0211088	15.741	2.20865	1.81362	0	0.395036	0.742123	86.4736
	Evolved Orangeite (Group-2 kimberlite)	Sibanye, Karee-3 Shaft	LM_5_phl_6_core_1	40.07	2.63	11.86	0.41	6.72	0.02	23.15	0.1	0.12	9.73	0.63	0.85	0.01	96.3		5.75393	0.284076	2.00718	0.0465488	0.807001	0.00243257	4.95574	0.0153859	0.0334098	1.78247	0.0354514	15.7236	2.24607	2.00718	0	0.238893	0.568108	89.7153
	Evolved Orangeite (Group-2 kimberlite)	Sibanye, Karee-3 Shaft	LM_5_phl_6_core_2	40.08	2.54	11.72	0.21	6.84	0.07	23.22	0.05	0.11	9.96	0.51	0.89	0.01	96.21		5.76637	0.274879	1.98727	0.0238876	0.822982	0.00853025	4.98022	0.00770764	0.0306842	1.8281	0.0287536	15.7594	2.23363	1.98727	0	0.24636	0.576622	89.6232
	Evolved Orangeite (Group-2 kimberlite)	Sibanye, Karee-3 Shaft	LM_5_phl_6_rim_3	39.61	2.74	10.96	0.03	8.39	0.1	22.17	0.14	0.11	9.89	0.46	0.83	0.01	95.44		5.77841	0.300668	1.88438	0.00346022	1.02359	0.0123564	4.82149	0.0218831	0.0311131	1.84062	0.0262972	15.7443	2.22159	1.88438	0	0.337209	0.686378	87.5382
	Evolved Orangeite (Group-2 kimberlite)	Sibanye, Karee-3 Shaft	LM_5_phl_6_rim_4	39.63	2.81	11.35	0.09	7.22	0.06	22.45	0.12	0.1	9.7	0.54	0.97	0.01	95.05		5.78366	0.308474	1.95222	0.0103848	0.881202	0.00741684	4.88435	0.0187645	0.0282961	1.80599	0.030883	15.7116	2.21634	1.95222	0	0.264116	0.617085	88.7832
	Evolved Orangeite (Group-2 kimberlite)	Sibanye, Karee-3 Shaft	LM_5_phl_7_core_1	40.18	2.7	12.12	0.28	6.22	0.06	23.56	0.09	0.13	10.12	0.56	0.83	0.02	96.87		5.72997	0.289627	2.03704	0.0315703	0.741809	0.00724741	5.00875	0.0137519	0.0359445	1.84114	0.0312952	15.7681	2.27003	2.03704	0	0.232992	0.508817	90.7782
	Evolved Orangeite (Group-2 kimberlite)	Sibanye, Karee-3 Shaft	LM_5_phl_7_core_2	39.3	2.65	12.34	0.76	6.11	0.03	23.07	0.11	0.12	10.09	0.59	0.87	0	96.04		5.66779	0.287475	2.09745	0.0866591	0.736923	0.00366465	4.96	0.0169977	0.0335544	1.85643	0.0333443	15.7803	2.33221	2.09745	0	0.234753	0.502171	90.8064
	Evolved Orangeite (Group-2 kimberlite)	Sibanye, Karee-3 Shaft	LM_5_phl_7_rim_3	40.36	2.94	11.76	0.15	7.27	0.08	23.01	0.11	0.14	10.04	0.59	0.84	0.01	97.3		5.75019	0.315073	1.97467	0.0168967	0.866213	0.00965407	4.88719	0.0167919	0.0386728	1.82486	0.0329405	15.7332	2.24981	1.97467	0	0.275146	0.591067	89.2107
	Evolved Orangeite (Group-2 kimberlite)	Sibanye, Karee-3 Shaft	LM_5_phl_8_core_1	39.51	2.89	11.16	0.04	8.78	0.07	21.78	0.17	0.09	10.05	0.46	0.76	0.01	95.77		5.75648	0.316724	1.91633	0.00460775	1.0698	0.00863847	4.73064	0.0265384	0.0254237	1.86802	0.0262637	15.7495	2.24352	1.91633	0	0.327198	0.742604	86.4321
	Evolved Orangeite (Group-2 kimberlite)	Sibanye, Karee-3 Shaft	LM_5_phl_8_rim_2	38.83	3.29	9.58	0	13.96	0.17	18.9	0.15	0.1	9.96	0.46	0.57	0	95.97		5.76347	0.367321	1.67586	0	1.73285	0.0213725	4.18206	0.0238553	0.0287782	1.886	0.0267561	15.7083	2.23653	1.67586	0	0.560668	1.17219	78.1074
	Evolved Orangeite (Group-2 kimberlite)	Sibanye, Karee-3 Shaft	LM_5_phl_8_rim_3	38.4	3.46	8.41	0	17.47	0.19	16.79	0.18	0.1	9.65	0.4	0.5	0	95.55		5.80254	0.393275	1.49775	0	2.2077	0.0243181	3.78225	0.0291431	0.0292978	1.86028	0.0236862	15.6502	2.19746	1.49775	0	0.699708	1.50799	71.4949
	Evolved Orangeite (Group-2 kimberlite)	Sibanye, Karee-3 Shaft	LM_5_phl_9_rim_1	37.64	3.58	7.94	0	19.99	0.27	15.7	0.15	0.12	9.48	0.44	0.4	0.01	95.72		5.73919	0.410598	1.42685	0	2.54902	0.0348702	3.56872	0.0245058	0.0354756	1.84406	0.0262906	15.6596	2.26081	1.42685	0	0.833966	1.71505	67.5411
	Evolved Orangeite (Group-2 kimberlite)	Sibanye, Karee-3 Shaft	LM_5_phl_9_core_3	39.82	2.77	11.43	0.04	7.4	0.06	22.4	0.18	0.14	9.94	0.52	0.89	0.01	95.6		5.78399	0.302649	1.95672	0.00459373	0.898914	0.00738188	4.8505	0.028014	0.0394277	1.84195	0.029599	15.7437	2.21601	1.95672	0	0.259287	0.639626	88.3495
	Evolved Orangeite (Group-2 kimberlite)	Sibanye, Karee-3 Shaft	LM_5_phl_9_core_4	39.63	2.85	11.52	0.05	7.73	0.06	22.62	0.17	0.13	10.01	0.45	0.94	0	96.16		5.73077	0.310004	1.96335	0.00571661	0.934821	0.00734903	4.87634	0.0263399	0.0364485	1.84667	0.0255005	15.7633	2.26923	1.96335	0	0.305878	0.628943	88.5756
	Evolved Orangeite (Group-2 kimberlite)	Sibanye, Karee-3 Shaft	LM_5_phl_9_rim_5	36.91	3.66	7.11	0.03	22.27	0.29	14.09	0.1	0.11	9.54	0.49	0.32	0	94.92		5.74463	0.428482	1.3042	0.00369163	2.89866	0.0382301	3.2692	0.0166761	0.0331939	1.89422	0.0298856	15.6611	2.25537	1.3042	0	0.951175	1.94749	62.6681
	Evolved Orangeite (Group-2 kimberlite)	Sibanye, Karee-3 Shaft	LM_5_phl_9_rim_6	36.24	4.14	4.97	0	29.64	0.38	10.23	0.17	0.21	8.99	0.42	0.15	0.01	95.55		5.76811	0.495654	0.932303	0	3.94533	0.0512293	2.42735	0.0289915	0.0648055	1.82545	0.0261964	15.5654	2.23189	0.932303	0	1.29959	2.64574	47.8476
	Evolved Orangeite (Group-2 kimberlite)	Sibanye, Karee-3 Shaft	LM_5_phl_10_largeXTL_core_1	40.02	2.06	12.24	0.5	5.66	0.03	23.71	0.01	0.12	10.28	0.45	0.89	0.01	95.98		5.75765	0.22293	2.07541	0.0568744	0.680995	0.00365577	5.08524	0.0015415	0.0334731	1.8868	0.0253705	15.8299	2.24235	2.07541	0	0.166938	0.514057	90.8193
	Evolved Orangeite (Group-2 kimberlite)	Sibanye, Karee-3 Shaft	LM_5_phl_10_largeXTL_core_2	40.27	2.22	12.14	0.27	6.1	0.06	23.54	0.03	0.1	10.37	0.41	0.74	0.01	96.26		5.77475	0.239462	2.05175	0.0306122	0.731544	0.00728772	5.03234	0.00460945	0.0278034	1.89712	0.02304	15.8203	2.22525	2.05175	0	0.173499	0.558045	90.0178
	Evolved Orangeite (Group-2 kimberlite)	Sibanye, Karee-3 Shaft	LM_5_phl_10_largeXTL_rim_3	40.83	2.09	12.41	0.27	5.97	0.05	24.09	0.04	0.13	10.27	0.41	0.72	0	97.28		5.77948	0.22253	2.07031	0.030217	0.706713	0.00599471	5.08344	0.00606661	0.0356779	1.85458	0.0227426	15.8178	2.22052	2.07031	0	0.15021	0.556503	90.1328
	Evolved Orangeite (Group-2 kimberlite)	Sibanye, Karee-3 Shaft	LM_5_phl_10_largeXTL_rim_4	40.31	2.42	12.52	0.5	5.76	0.09	23.8	0.04	0.12	10.15	0.6	0.95	0.01	97.27		5.7269	0.258616	2.09636	0.0561637	0.684367	0.0108303	5.04076	0.00608897	0.0330549	1.83966	0.0334046	15.7862	2.2731	2.09636	0	0.176736	0.507631	90.8508
	Evolved Orangeite (Group-2 kimberlite)	Sibanye, Karee-3 Shaft	LM_5_phl_10_largeXTL_rim_5	39.93	2.59	12.55	0.6	5.99	0.03	23.62	0.22	0.19	9.93	0.62	0.93	0	97.2		5.68004	0.277131	2.10403	0.0674811	0.712588	0.00361462	5.00892	0.0335314	0.0524026	1.80205	0.0345614	15.7763	2.31996	2.10403	0	0.215938	0.496649	90.9791
	Evolved Orangeite (Group-2 kimberlite)	Sibanye, Karee-3 Shaft	LM_5_phl_11_largeXTL_core_1	41.8	1.58	12.35	0.37	4.58	0.01	24.9	0.03	0.21	10.34	0.16	0.72	0.01	97.06		5.88161	0.167228	2.04806	0.0411624	0.538946	0.00119182	5.22314	0.00452291	0.057291	1.85612	0.00882242	15.8281	2.11839	2.04806	0	0.0703309	0.468615	91.7668
	Evolved Orangeite (Group-2 kimberlite)	Sibanye, Karee-3 Shaft	LM_5_phl_11_largeXTL_core_2	41.43	1.51	12.49	0.34	4.77	0.02	24.99	0.03	0.21	10.27	0.25	0.67	0.01	96.99		5.84045	0.160118	2.07515	0.0378956	0.562353	0.00238809	5.25182	0.00453137	0.0573981	1.847	0.0138108	15.8529	2.15955	2.07515	0	0.0844039	0.477949	91.6585
	Evolved Orangeite (Group-2 kimberlite)	Sibanye, Karee-3 Shaft	LM_5_phl_11_largeXTL_core_3	40.05	1.67	13.3	1.82	4.57	0.03	23.81	0.04	0.17	10.19	0.29	0.61	0	96.55		5.695	0.178624	2.22894	0.204617	0.54346	0.00361328	5.04735	0.00609436	0.0468692	1.84855	0.0161598	15.8193	2.305	2.22894	0	0.0760564	0.467403	91.5245
	Evolved Orangeite (Group-2 kimberlite)	Sibanye, Karee-3 Shaft	LM_5_phl_11_largeXTL_core_4	40.38	1.68	13.23	1.72	4.51	0.03	23.7	0.02	0.19	10.16	0.27	0.6	0	96.49		5.73895	0.179601	2.21606	0.193274	0.536046	0.00361141	5.02142	0.0030456	0.052356	1.84215	0.0150376	15.8015	2.26105	2.21606	0	0.0449958	0.49105	91.092
	Evolved Orangeite (Group-2 kimberlite)	Sibanye, Karee-3 Shaft	LM_5_phl_11_largeXTL_core_5	41.17	1.46	12.36	1.02	4.19	0.03	24.39	0.06	0.22	10.13	0.19	0.63	0.02	95.87		5.86136	0.156352	2.07392	0.114814	0.498874	0.00361766	5.17656	0.00915262	0.0607278	1.83989	0.0106003	15.8059	2.13864	2.07392	0	0.0647227	0.434152	92.2621
	Evolved Orangeite (Group-2 kimberlite)	Sibanye, Karee-3 Shaft	LM_5_phl_11_largeXTL_rim_6	40.19	1.72	13.25	1.72	4.57	0.01	23.69	0.02	0.13	10.29	0.27	0.6	0.01	96.47		5.71909	0.184107	2.22218	0.193516	0.543857	0.00120531	5.02558	0.00304941	0.0358673	1.86805	0.0150564	15.8116	2.28091	2.22218	0	0.0587319	0.485125	91.1967
	Evolved Orangeite (Group-2 kimberlite)	Sibanye, Karee-3 Shaft	LM_5_phl_11_largeXTL_rim_7	40.43	1.72	13.09	1.7	4.58	0.02	23.8	0.04	0.18	10.17	0.31	0.65	0.02	96.71		5.73793	0.183617	2.18951	0.190756	0.543596	0.0024042	5.03547	0.00608258	0.0495303	1.84135	0.0172409	15.7975	2.26207	2.18951	0	0.0725687	0.471027	91.446
	Evolved Orangeite (Group-2 kimberlite)	Sibanye, Karee-3 Shaft	LM_5_phl_11_largeXTL_rim_8	40.04	1.72	13.08	1.7	4.72	0.01	23.74	0.03	0.16	10.13	0.3	0.59	0.02	96.24		5.71127	0.184544	2.19888	0.19172	0.563041	0.00120817	5.04814	0.00458497	0.0442492	1.84337	0.016769	15.8078	2.28873	2.19888	0	0.0898528	0.473188	91.4298
	Evolved Orangeite (Group-2 kimberlite)	Sibanye, Karee-3 Shaft	LM_5_phl_11_largeXTL_rim_9	39.56	2.69	12.35	0.57	6.09	0.03	22.93	0.02	0.09	10.16	0.58	0.96	0.01	96.04		5.70866	0.291987	2.10039	0.0650327	0.734945	0.00366681	4.9328	0.00309232	0.0251807	1.87041	0.0327985	15.769	2.29134	2.10039	0	0.190952	0.543993	90.0673
	Evolved Orangeite (Group-2 kimberlite)	Sibanye, Karee-3 Shaft	LM_5_phl_11_largeXTL_rim_10	40.04	2.57	12.5	0.41	6.25	0.07	23.47	0.05	0.1	9.97	0.51	0.91	0.02	96.87		5.71414	0.275882	2.10243	0.0462615	0.745927	0.00846143	4.99323	0.00764545	0.0276697	1.81517	0.0285216	15.7653	2.28586	2.10243	0	0.183431	0.562496	89.8754
	Evolved Orangeite (Group-2 kimberlite)	Sibanye, Karee-3 Shaft	LM4_Phl_1_largeXtl_rim_1	40.37	2.83	11.84	0.09	7.54	0.08	22.84	0.07	0.09	9.53	0.55	0.92	0.01	96.76		5.77847	0.304701	1.99738	0.0101854	0.902579	0.00969915	4.87374	0.0107357	0.0249772	1.74025	0.0308507	15.6836	2.22153	1.99738	0	0.224141	0.678438	87.7807
	Evolved Orangeite (Group-2 kimberlite)	Sibanye, Karee-3 Shaft	LM4_Phl_1_largeXtl_rim_2	40.46	2.7	12.58	0.41	6.28	0.07	23.66	0.04	0.1	9.49	0.53	0.91	0	97.23		5.7323	0.28774	2.10058	0.0459268	0.744085	0.00840022	4.99724	0.00607211	0.0274695	1.71528	0.0294257	15.6945	2.2677	2.10058	0	0.167117	0.576968	89.6493
	Evolved Orangeite (Group-2 kimberlite)	Sibanye, Karee-3 Shaft	LM4_Phl_1_largeXtl_rim_3	39.89	2.64	12.46	0.4	6.12	0.07	23.24	0.07	0.1	10.2	0.57	0.96	0	96.72		5.7126	0.284385	2.10302	0.0452907	0.732961	0.00849096	4.96156	0.010741	0.0277662	1.86352	0.0319884	15.7823	2.2874	2.10302	0	0.184385	0.548576	90.0442
	Evolved Orangeite (Group-2 kimberlite)	Sibanye, Karee-3 Shaft	LM4_Phl_1_largeXtl_core_4	39.67	2.56	12.52	0.62	5.7	0.06	23.38	0.05	0.11	10.15	0.58	0.99	0	96.39		5.69511	0.276448	2.11836	0.0703738	0.684344	0.00729593	5.00376	0.00769107	0.0306182	1.85896	0.0326299	15.7856	2.30489	2.11836	0	0.186528	0.497816	90.9514
	Evolved Orangeite (Group-2 kimberlite)	Sibanye, Karee-3 Shaft	LM4_Phl_1_largeXtl_core_5	39.61	2.54	12.61	0.64	5.89	0.04	23.38	0.06	0.12	10.29	0.56	1.01	0.01	96.76		5.67502	0.273735	2.12928	0.0724973	0.705729	0.00485414	4.99367	0.00921066	0.0333343	1.8808	0.0314412	15.8096	2.32498	2.12928	0	0.195695	0.510034	90.7329
	Evolved Orangeite (Group-2 kimberlite)	Sibanye, Karee-3 Shaft	LM4_Phl_1_largeXtl_core_6	39.44	2.61	12.55	0.65	5.81	0.04	23.05	0.07	0.12	10.14	0.55	0.96	0	95.99		5.68944	0.283209	2.13369	0.0741353	0.70092	0.00488745	4.95697	0.0108195	0.0335631	1.8661	0.0310916	15.7848	2.31056	2.13369	0	0.176862	0.524058	90.4387
	Evolved Orangeite (Group-2 kimberlite)	Sibanye, Karee-3 Shaft	LM4_Phl_1_largeXtl_rim_6	39.49	2.6	12.18	0.38	6.14	0.06	22.83	0.11	0.11	10.26	0.57	0.98	0	95.71		5.72482	0.283518	2.08103	0.0435549	0.744394	0.00736742	4.93393	0.0170861	0.0309182	1.89752	0.0323815	15.7965	2.27518	2.08103	0	0.194155	0.550239	89.9668
	Evolved Orangeite (Group-2 kimberlite)	Sibanye, Karee-3 Shaft	LM4_Phl_1_largeXtl_rim_7	39.36	2.93	11.87	0.16	7.13	0.07	22.65	0.19	0.11	10.2	0.48	0.97	0	96.12		5.69426	0.318847	2.0239	0.0183013	0.862643	0.00857767	4.88498	0.0294518	0.0308548	1.88255	0.0272127	15.7816	2.30574	2.0239	0	0.281844	0.5808	89.3739
	Evolved Orangeite (Group-2 kimberlite)	Sibanye, Karee-3 Shaft	LM4_Phl_2_smallXtl_core_1	38.79	2.78	11.96	0.52	6.41	0.06	22.63	0.11	0.1	10.02	0.64	0.98	0	95		5.67269	0.305807	2.06137	0.0601245	0.783947	0.00743207	4.93362	0.0172361	0.0283541	1.8694	0.0366773	15.7767	2.32731	2.06137	0	0.265939	0.518008	90.4981
	Evolved Orangeite (Group-2 kimberlite)	Sibanye, Karee-3 Shaft	LM4_Phl_2_smallXtl_core_2	39.18	2.88	11.67	0.35	7.25	0.06	22.31	0.12	0.08	10.14	0.58	1.02	0.01	95.65		5.70831	0.315623	2.00387	0.0403172	0.883365	0.00740429	4.84568	0.0187327	0.0225985	1.88472	0.0331145	15.7637	2.29169	2.00387	0	0.287826	0.595539	89.055
	Evolved Orangeite (Group-2 kimberlite)	Sibanye, Karee-3 Shaft	LM4_Phl_2_smallXtl_core_3	39.56	2.82	12.09	0.34	6.33	0	22.81	0.14	0.1	10.1	0.62	0.92	0.01	95.84		5.72111	0.306765	2.06066	0.038876	0.765575	0	4.9177	0.0216935	0.0280396	1.86342	0.0351369	15.759	2.27889	2.06066	0	0.21823	0.547344	89.9846
	Evolved Orangeite (Group-2 kimberlite)	Sibanye, Karee-3 Shaft	LM4_Phl_3_smallXtl_core_1	39.6	2.78	11.75	0.2	6.79	0.02	22.84	0.11	0.1	10.09	0.57	0.87	0.01	95.73		5.73513	0.302849	2.00559	0.0229011	0.822389	0.00245339	4.93124	0.0170694	0.0280799	1.86425	0.0323497	15.7643	2.26487	2.00559	0	0.259284	0.563106	89.7512
	Evolved Orangeite (Group-2 kimberlite)	Sibanye, Karee-3 Shaft	LM4_Phl_3_smallXtl_core_2	39.52	2.74	11.88	0.15	6.76	0.07	22.87	0.08	0.09	10.18	0.47	0.93	0	95.74		5.72575	0.298606	2.02856	0.0171825	0.819071	0.00859019	4.93962	0.0124189	0.0252816	1.8816	0.0266846	15.7834	2.27425	2.02856	0	0.245692	0.573379	89.5995
	Evolved Orangeite (Group-2 kimberlite)	Sibanye, Karee-3 Shaft	LM4_Phl_4_smallXtl_core_1	40.13	2.81	11.68	0.15	6.82	0.07	23.22	0.1	0.13	9.78	0.61	0.93	0.02	96.45		5.75775	0.303266	1.97507	0.0170159	0.818329	0.0085069	4.96659	0.0153731	0.0361638	1.79014	0.0342974	15.7225	2.24225	1.97507	0	0.267179	0.551149	90.0113
	Evolved Orangeite (Group-2 kimberlite)	Sibanye, Karee-3 Shaft	LM4_Phl_5_smallXtl_core_1	39.84	2.86	11.22	0.04	9.2	0.09	22.16	0.16	0.12	9.82	0.55	0.8	0.02	96.88		5.74125	0.310018	1.90562	0.0045575	1.10875	0.0109855	4.76068	0.024705	0.0335286	1.80536	0.0310597	15.7365	2.25875	1.90562	0	0.353129	0.755624	86.302
	Evolved Orangeite (Group-2 kimberlite)	Sibanye, Karee-3 Shaft	LM4_Phl_5_smallXtl_core_2	39.63	2.89	10.6	0.05	11.03	0.09	21.12	0.17	0.11	9.64	0.42	0.61	0.01	96.37		5.76515	0.316241	1.81739	0.0057509	1.34191	0.0110897	4.58029	0.026498	0.0310261	1.78908	0.0239433	15.7084	2.23485	1.81739	0	0.417458	0.924447	83.2063
	Evolved Orangeite (Group-2 kimberlite)	Sibanye, Karee-3 Shaft	LM4_Phl_5_smallXtl_rim_3	39.52	2.99	10.14	0.02	13.09	0.11	19.82	0.14	0.14	9.61	0.38	0.58	0	96.54		5.7879	0.329389	1.75024	0.00231587	1.60326	0.0136454	4.32733	0.0219689	0.0397539	1.79553	0.021809	15.6931	2.2121	1.75024	0	0.461857	1.1414	79.1286
	Evolved Orangeite (Group-2 kimberlite)	Sibanye, Karee-3 Shaft	LM4_Phl_5_smallXtl_rim_4	39.06	3.14	9.78	0.02	14.79	0.16	18.72	0.16	0.1	9.45	0.41	0.56	0.01	96.36		5.77561	0.349244	1.70436	0.00233816	1.82892	0.020039	4.12652	0.0253491	0.028669	1.78264	0.0237573	15.6674	2.22439	1.70436	0	0.520032	1.30888	75.9193
	Evolved Orangeite (Group-2 kimberlite)	Sibanye, Karee-3 Shaft	LM4_Phl_5_smallXtl_rim_5	39.13	3.29	9.14	0	16.73	0.23	17.66	0.2	0.1	9.5	0.32	0.54	0	96.84		5.80056	0.366851	1.59684	0	2.07403	0.0288787	3.90268	0.0317663	0.0287414	1.79659	0.0185891	15.6455	2.19944	1.59684	0	0.602596	1.47144	72.6199
	Evolved Orangeite (Group-2 kimberlite)	Sibanye, Karee-3 Shaft	LM4_Phl_5_smallXtl_rim_6	38.67	3.42	8.49	0	18.85	0.26	16.25	0.35	0.14	9.11	0.33	0.5	0.03	96.4		5.80938	0.386469	1.50321	0	2.36824	0.033084	3.63932	0.0563378	0.0407784	1.74598	0.0194275	15.6022	2.19062	1.50321	0	0.687419	1.68082	68.4065
	Evolved Orangeite (Group-2 kimberlite)	Sibanye, Karee-3 Shaft	LM4_Phl_6_smallXtl_core_1	39.46	2.95	11.35	0.25	7.3	0.05	22.83	0.15	0.11	10.04	0.6	0.94	0.01	96.04		5.71012	0.321102	1.93571	0.0286027	0.883427	0.00612841	4.925	0.0232571	0.0308623	1.85348	0.0340241	15.7517	2.28988	1.93571	0	0.354174	0.529253	90.2965
	Evolved Orangeite (Group-2 kimberlite)	Sibanye, Karee-3 Shaft	LM4_Phl_6_smallXtl_core_2	39.23	2.69	11.21	0.1	7.78	0.04	22.34	0.36	0.11	9.63	0.48	0.8	0.01	94.78		5.74613	0.296376	1.93517	0.0115807	0.953008	0.00496257	4.87812	0.0564985	0.031239	1.79949	0.0275516	15.7401	2.25387	1.93517	0	0.318698	0.63431	88.4931
	Evolved Orangeite (Group-2 kimberlite)	Sibanye, Karee-3 Shaft	LM4_Phl_6_smallXtl_core_3	39.74	2.7	11.29	0.09	7.88	0.09	22.39	0.18	0.08	10.09	0.42	0.87	0	95.82		5.76869	0.294812	1.93152	0.0103293	0.95661	0.0110658	4.84524	0.0279961	0.0225157	1.86855	0.0238916	15.7612	2.23131	1.93152	0	0.299798	0.656812	88.0624
	Evolved Orangeite (Group-2 kimberlite)	Sibanye, Karee-3 Shaft	LM4_Phl_6_smallXtl_rim_7	39.75	3.46	6.43	0.02	18.01	0.25	16.06	0.33	0.48	9.72	0.17	0.53	0.01	95.22		6.02612	0.394557	1.14886	0.00239723	2.28336	0.0321019	3.6296	0.0536033	0.141088	1.87989	0.0100994	15.6017	1.97388	1.14886	0	0.825019	1.45834	71.3373
	Evolved Orangeite (Group-2 kimberlite)	Sibanye, Karee-3 Shaft	LM4_Phl_7_smallXtl_rim_1	38.6	3.33	9.41	0	15.22	0.17	17.89	0.17	0.09	9.74	0.43	0.58	0	95.63		5.78069	0.37512	1.66088	0	1.90619	0.0215641	3.99407	0.0272784	0.0261326	1.86087	0.0252353	15.678	2.21931	1.66088	0	0.558427	1.34777	74.7696
	Evolved Orangeite (Group-2 kimberlite)	Sibanye, Karee-3 Shaft	LM4_Phl_7_smallXtl_rim_2	37.77	3.72	7.54	0	20.53	0.27	14.77	0.18	0.14	9.6	0.31	0.45	0	95.28		5.80442	0.430019	1.36565	0	2.63852	0.0351451	3.3838	0.0296388	0.0417145	1.88212	0.018669	15.6297	2.19558	1.36565	0	0.829935	1.80858	65.1685
	Evolved Orangeite (Group-2 kimberlite)	Sibanye, Karee-3 Shaft	LM4_Phl_7_smallXtl_rim_3	38.59	3.38	9.33	0	15.3	0.19	18.12	0.15	0.11	9.56	0.45	0.51	0	95.69		5.76559	0.379856	1.64288	0	1.9117	0.0240443	4.03589	0.0240125	0.0318646	1.82218	0.0263469	15.6644	2.23441	1.64288	0	0.591527	1.32017	75.3518
	Evolved Orangeite (Group-2 kimberlite)	Sibanye, Karee-3 Shaft	LM4_Phl_7_smallXtl_rim_4	39.18	3.05	9.81	0.02	13.73	0.17	19.35	0.12	0.08	9.18	0.38	0.59	0	95.66		5.79836	0.339527	1.71106	0.00234018	1.6993	0.0213098	4.26908	0.0190283	0.022955	1.7332	0.022038	15.6382	2.20164	1.71106	0	0.490578	1.20873	77.9341
	Evolved Orangeite (Group-2 kimberlite)	Sibanye, Karee-3 Shaft	LM4_Phl_7_smallXtl_core_5	39.96	2.51	10.68	0.09	8.44	0.07	22.69	0.1	0.09	9.86	0.38	0.89	0	95.76		5.8013	0.274099	1.82737	0.0103305	1.02471	0.0086077	4.91074	0.0155552	0.0253332	1.82617	0.0216188	15.7458	2.1987	1.82737	0	0.371328	0.653385	88.2572
	Evolved Orangeite (Group-2 kimberlite)	Sibanye, Karee-3 Shaft	LM4_Phl_7_smallXtl_core_6	39.99	2.87	10.9	0.18	7.74	0.06	22.64	0.11	0.09	9.66	0.53	1	0.01	95.78		5.79509	0.312841	1.86162	0.0206234	0.938014	0.0073646	4.891	0.0170796	0.0252871	1.78587	0.0300976	15.6849	2.20491	1.86162	0	0.343293	0.594721	89.1587
	Evolved Orangeite (Group-2 kimberlite)	Sibanye, Karee-3 Shaft	LM4_Phl_7_smallXtl_core_7	40.31	2.69	11.13	0.18	7.38	0.05	22.84	0.09	0.1	9.87	0.63	0.95	0.01	96.23		5.81197	0.29174	1.8913	0.0205193	0.88987	0.00610618	4.90929	0.0139037	0.0279549	1.81548	0.0355958	15.7137	2.18803	1.8913	0	0.296729	0.593141	89.2204
	Evolved Orangeite (Group-2 kimberlite)	Sibanye, Karee-3 Shaft	LM4_Phl_7_smallXtl_core_8	39.65	2.93	11.44	0.16	8.05	0.06	22.54	0.11	0.1	9.96	0.59	0.84	0.01	96.44		5.72151	0.31803	1.94558	0.0182544	0.971456	0.00733345	4.84879	0.0170074	0.0279779	1.83355	0.0333632	15.7428	2.27849	1.94558	0	0.33291	0.638545	88.3633
	Evolved Orangeite (Group-2 kimberlite)	Sibanye, Karee-3 Shaft	LM4_Phl_7_smallXtl_core_9	39.74	2.89	10.92	0.07	9.17	0.1	21.92	0.12	0.1	9.93	0.41	0.83	0.01	96.21		5.76581	0.315401	1.86729	0.00802989	1.11266	0.0122892	4.74117	0.0186548	0.0281307	1.83801	0.0233112	15.7307	2.23419	1.86729	0	0.366902	0.745755	86.4085
	Evolved Orangeite (Group-2 kimberlite)	Sibanye, Karee-3 Shaft	LM4_Phl_7_smallXtl_rim_10	38.61	3.87	8.32	0	17.87	0.23	16.45	0.36	0.14	9.49	0.49	0.41	0.02	96.26		5.79284	0.436753	1.4712	0	2.24221	0.0292287	3.67934	0.0578723	0.0407255	1.81645	0.0288095	15.5954	2.20716	1.4712	0	0.735966	1.50624	70.9533
	Evolved Orangeite (Group-2 kimberlite)	Sibanye, Karee-3 Shaft	LM4_Phl_8_LargeXtl_rim_1	39.59	2.65	12.28	0.59	6.09	0.06	23.17	0.07	0.11	10.01	0.64	0.9	0	96.16		5.69882	0.286932	2.08331	0.0671476	0.733122	0.00731544	4.97208	0.0107963	0.0307001	1.83822	0.0361017	15.7645	2.30118	2.08331	0	0.21787	0.515252	90.6101
	Evolved Orangeite (Group-2 kimberlite)	Sibanye, Karee-3 Shaft	LM4_Phl_8_LargeXtl_rim_2	39.45	2.67	11.92	0.41	6.81	0.04	23.06	0.08	0.13	10.03	0.54	0.79	0	95.93		5.69656	0.290008	2.02861	0.0468089	0.82238	0.00489232	4.96406	0.0123775	0.0363962	1.8477	0.0305568	15.7804	2.30344	2.02861	0	0.274831	0.547549	90.0655
	Evolved Orangeite (Group-2 kimberlite)	Sibanye, Karee-3 Shaft	LM4_Phl_8_LargeXtl_core_3	40.7	1.66	12.53	0.74	5.14	0.05	23.87	0.04	0.14	10.4	0.24	0.57	0.01	96.09		5.81315	0.178344	2.10923	0.0835657	0.61396	0.0060489	5.08255	0.00612144	0.0387697	1.89503	0.0134331	15.8402	2.18685	2.10923	0	0.0776223	0.536337	90.4547
	Evolved Orangeite (Group-2 kimberlite)	Sibanye, Karee-3 Shaft	LM4_Phl_8_LargeXtl_core_4	39.92	1.59	13.12	1.78	4.64	0.03	23.5	0.04	0.16	10.31	0.28	0.62	0.01	96		5.71788	0.171307	2.21479	0.201578	0.555804	0.00363961	5.01793	0.00613876	0.0444336	1.88394	0.0157163	15.8332	2.28212	2.21479	0	0.0673303	0.488474	91.129
	Evolved Orangeite (Group-2 kimberlite)	Sibanye, Karee-3 Shaft	LM4_Phl_8_LargeXtl_core_5	39.99	1.71	13.13	1.67	4.7	0.02	23.37	0.04	0.16	10.3	0.27	0.61	0	95.97		5.7277	0.184229	2.2164	0.189114	0.562971	0.00242632	4.98999	0.00613855	0.044432	1.88205	0.0151544	15.8206	2.2723	2.2164	0	0.0558982	0.507073	90.7756
	Evolved Orangeite (Group-2 kimberlite)	Sibanye, Karee-3 Shaft	LM4_Phl_8_LargeXtl_core_6	39.85	1.76	13.03	1.75	4.41	0.05	23.44	0.06	0.17	10.18	0.3	0.66	0	95.66		5.72149	0.190076	2.20486	0.198654	0.529516	0.00608052	5.01708	0.00923016	0.0473236	1.86464	0.0168791	15.8058	2.27851	2.20486	0	0.0736453	0.455871	91.6705
	Evolved Orangeite (Group-2 kimberlite)	Sibanye, Karee-3 Shaft	LM4_Phl_8_LargeXtl_core_7	39.73	1.65	13.05	1.75	4.56	0.04	23.3	0.04	0.17	10.3	0.27	0.57	0	95.43		5.72116	0.178724	2.21479	0.199243	0.549149	0.00487882	5.00189	0.00617167	0.0474637	1.8922	0.0152362	15.8309	2.27884	2.21479	0	0.0640507	0.485098	91.1591
	Evolved Orangeite (Group-2 kimberlite)	Sibanye, Karee-3 Shaft	LM4_Phl_8_LargeXtl_core_8	39.77	1.82	12.96	1.74	4.6	0.05	23.32	0.05	0.15	10.26	0.3	0.65	0	95.67		5.71562	0.196749	2.19517	0.197714	0.552873	0.0060865	4.9963	0.00769936	0.0417971	1.88114	0.0168957	15.808	2.28438	2.19517	0	0.0892046	0.463669	91.5079
	Evolved Orangeite (Group-2 kimberlite)	Sibanye, Karee-3 Shaft	LM4_Phl_8_LargeXtl_rim_9	39.32	2.57	12.34	0.62	5.92	0.03	23.27	0.11	0.09	10.17	0.61	0.89	0	95.94		5.67465	0.278992	2.09892	0.0707451	0.714508	0.00366721	5.0065	0.0170096	0.0251835	1.87246	0.0344987	15.7971	2.32535	2.09892	0	0.226428	0.488079	91.1171
	Evolved Orangeite (Group-2 kimberlite)	Sibanye, Karee-3 Shaft	LM4_Phl_9_smallXtl_core_1	39.48	3.18	11.45	0.11	8.5	0.09	21.91	0.23	0.12	9.57	0.46	0.77	0.03	95.9		5.72523	0.346878	1.95694	0.0126121	1.03085	0.0110547	4.73664	0.0357372	0.03374	1.77049	0.026141	15.6863	2.27477	1.95694	0	0.317828	0.71302	86.9163
	Evolved Orangeite (Group-2 kimberlite)	Sibanye, Karee-3 Shaft	LM4_Phl_9_smallXtl_core_2	39.49	2.54	12.57	0.65	6.06	0.04	23.24	0.18	0.12	9.78	0.65	0.86	0.01	96.19		5.67786	0.274704	2.13004	0.0738908	0.728669	0.00487133	4.98134	0.0277298	0.0334523	1.79391	0.0366234	15.7631	2.32214	2.13004	0	0.192092	0.536577	90.2757
	Evolved Orangeite (Group-2 kimberlite)	Sibanye, Karee-3 Shaft	LM4_Phl_10_smallXtl_core_1	39.8	2.51	12.38	0.64	5.59	0.05	23.47	0.33	0.14	9.84	0.61	0.88	0.03	96.27		5.70671	0.270713	2.09208	0.072554	0.670307	0.00607242	5.01681	0.0506983	0.0389204	1.79996	0.0342752	15.7591	2.29329	2.09208	0	0.201213	0.469094	91.4491
	Evolved Orangeite (Group-2 kimberlite)	Sibanye, Karee-3 Shaft	LM4_Phl_11_smallXtl_core_2	38.17	3.58	8.63	0.02	17.46	0.25	16.49	0.31	0.12	9.4	0.49	0.54	0.02	95.48		5.78001	0.407777	1.54018	0.0023945	2.21111	0.0320653	3.72254	0.0502973	0.0352318	1.81593	0.029077	15.6266	2.21999	1.54018	0	0.679812	1.5313	70.8537
	Evolved Orangeite (Group-2 kimberlite)	Sibanye, Karee-3 Shaft	LM4_Phl_12_smallXtl_core_1	39.63	2.49	12.34	0.53	6.04	0.08	23.32	0.07	0.11	10.22	0.53	0.83	0	96.19		5.69964	0.269374	2.09167	0.0602668	0.726473	0.00974546	4.99993	0.0107869	0.0306735	1.87516	0.0298708	15.8036	2.30036	2.09167	0	0.20869	0.517783	90.616
	Evolved Orangeite (Group-2 kimberlite)	Sibanye, Karee-3 Shaft	LM4_Phl_12_smallXtl_rim_2	38.45	3.34	9.56	0	14.55	0.2	18.48	0.08	0.09	9.92	0.44	0.68	0.01	95.8		5.74228	0.375204	1.68268	0	1.81723	0.0252993	4.11436	0.0128013	0.0260602	1.89001	0.0257507	15.7117	2.25772	1.68268	0	0.575035	1.2422	76.8098
	Evolved Orangeite (Group-2 kimberlite)	Sibanye, Karee-3 Shaft	LM4_Phl_12_smallXtl_rim_3	38.54	3.37	9.34	0.01	15.51	0.22	17.82	0.07	0.09	9.87	0.42	0.59	0	95.85		5.76922	0.379462	1.64781	0.00118354	1.94168	0.0278944	3.97672	0.0112274	0.0261213	1.8849	0.0246378	15.6908	2.23078	1.64781	0	0.582971	1.3587	74.5343
	Evolved Orangeite (Group-2 kimberlite)	Sibanye, Karee-3 Shaft	LM4_Phl_13_smallXtl_core_1	39.61	2.27	12.6	0.79	5.9	0.05	23.35	0.08	0.09	10.22	0.49	0.84	0	96.29		5.69077	0.245316	2.1335	0.0897372	0.708889	0.00608451	5.0011	0.012315	0.0250701	1.87319	0.0275874	15.8136	2.30923	2.1335	0	0.175729	0.53316	90.3662
	Evolved Orangeite (Group-2 kimberlite)	Sibanye, Karee-3 Shaft	LM4_Phl_14_smallXtl_bright_core_1	38.29	3.84	9	0.02	17.58	0.22	16.77	0.15	0.11	9.65	0.52	0.47	0.01	96.63		5.72641	0.431978	1.58634	0.00236486	2.19875	0.0278682	3.73889	0.0240362	0.0318961	1.84115	0.0304753	15.6402	2.27359	1.58634	0	0.687251	1.5115	71.2117
	Evolved Orangeite (Group-2 kimberlite)	Sibanye, Karee-3 Shaft	LM4_Phl_14_smallXtl_bright_core_2	38.29	3.83	9.09	0.01	17.77	0.24	16.62	0.2	0.1	9.85	0.53	0.43	0.01	96.97		5.71659	0.430114	1.59945	0.0011804	2.2187	0.0303496	3.69909	0.0319933	0.0289467	1.87609	0.0310081	15.6635	2.28341	1.59945	0	0.683956	1.53475	70.6765
	Evolved Orangeite (Group-2 kimberlite)	Sibanye, Karee-3 Shaft	LM4_Phl_14_smallXtl_bright_core_4	38.56	3.9	8.9	0	18.34	0.23	16.34	0.13	0.12	9.82	0.47	0.42	0.01	97.24		5.74608	0.437152	1.56308	0	2.28557	0.0290303	3.62994	0.0207565	0.0346707	1.86686	0.0274461	15.6406	2.25392	1.56308	0	0.690843	1.59472	69.477
	Evolved Orangeite (Group-2 kimberlite)	Sibanye, Karee-3 Shaft	LM4_Phl_15_smallXtl_core_1	40.46	1.76	8.19	0.02	11.98	0.13	22.3	0.13	0.1	9.56	0.27	0.65	0.01	95.56		5.9293	0.19401	1.41455	0.00231732	1.46823	0.0161365	4.87186	0.0204126	0.0284135	1.78731	0.0155056	15.748	2.0707	1.41455	0	0.656153	0.812077	85.7128
	Evolved Orangeite (Group-2 kimberlite)	Sibanye, Karee-3 Shaft	LM4_Phl_15_smallXtl_core_2	40.95	2.29	9.19	0.08	9.9	0.09	22.91	0.11	0.12	9.87	0.27	0.84	0	96.62		5.89958	0.248162	1.56041	0.00911248	1.19279	0.0109825	4.92045	0.01698	0.0335194	1.81405	0.0152433	15.7213	2.10042	1.56041	0	0.540009	0.652776	88.2873
	Evolved Orangeite (Group-2 kimberlite)	Sibanye, Karee-3 Shaft	LM4_Phl_16_largeXtl_core_1	39.62	1.6	13.04	1.68	4.47	0.01	23.55	0.08	0.17	10.17	0.29	0.62	0	95.3		5.70967	0.17344	2.21478	0.191419	0.538721	0.00122064	5.05941	0.0123527	0.0474999	1.86975	0.0163773	15.8346	2.29033	2.21478	0	0.0755505	0.46317	91.6132
	Evolved Orangeite (Group-2 kimberlite)	Sibanye, Karee-3 Shaft	LM4_Phl_16_largeXtl_core_2	39.66	1.68	13.2	1.8	4.52	0.02	23.26	0.17	0.19	10.11	0.28	0.53	0.01	95.43		5.70617	0.181817	2.23832	0.204759	0.543864	0.00243731	4.98901	0.026207	0.0530021	1.8557	0.0157869	15.8171	2.29383	2.23832	0	0.0555117	0.488352	91.0842
	Evolved Orangeite (Group-2 kimberlite)	Sibanye, Karee-3 Shaft	LM4_Phl_16_largeXtl_core_3	39.71	1.78	12.83	1.74	4.63	0.03	23.38	0.15	0.18	10.06	0.31	0.6	0.02	95.42		5.71582	0.192722	2.17651	0.198019	0.557339	0.00365754	5.0169	0.0231338	0.0502341	1.84732	0.0174859	15.7991	2.28418	2.17651	0	0.107671	0.449667	91.7742
	Evolved Orangeite (Group-2 kimberlite)	Sibanye, Karee-3 Shaft	LM4_Phl_16_largeXtl_rim_4	39.49	2.77	12.13	0.28	6.41	0.04	22.92	0.1	0.1	10.21	0.58	1.11	0.01	96.15		5.70768	0.301152	2.06628	0.031997	0.774801	0.00489691	4.93855	0.0154864	0.0280233	1.88262	0.032851	15.7843	2.29232	2.06628	0	0.226043	0.548758	89.9995
	Evolved Orangeite (Group-2 kimberlite)	Sibanye, Karee-3 Shaft	LM4_Phl_16_largeXtl_rim_5	39.68	2.67	12.18	0.33	6.18	0.05	22.99	0.17	0.11	10.2	0.5	0.93	0.01	96		5.72502	0.289767	2.07113	0.0376442	0.745681	0.00611033	4.94489	0.0262803	0.0307712	1.87746	0.0282698	15.783	2.27498	2.07113	0	0.203851	0.54183	90.1247
	Evolved Orangeite (Group-2 kimberlite)	Sibanye, Karee-3 Shaft	LM4_Phl_16_largeXtl_rim_6	39.73	2.73	12.34	0.34	6.41	0.03	23.07	0.25	0.12	10.08	0.54	0.95	0.02	96.61		5.70048	0.294638	2.08672	0.0385701	0.769149	0.00364589	4.93461	0.0384335	0.0333827	1.84509	0.0303623	15.7751	2.29952	2.08672	0	0.212805	0.556344	89.868
	Evolved Orangeite (Group-2 kimberlite)	Sibanye, Saffy Shaft	LM6_Phl_1_smallXtl_core_1	39.37	2.85	12.05	0.49	6.82	0.09	22.65	0.09	0.1	9.84	0.58	0.91	0	95.84		5.69806	0.31027	2.05544	0.0560708	0.825478	0.011033	4.887	0.0139566	0.0280614	1.81686	0.0328956	15.7351	2.30194	2.05544	0	0.2465	0.578978	89.4076
	Evolved Orangeite (Group-2 kimberlite)	Sibanye, Saffy Shaft	LM6_Phl_1_smallXtl_core_2	39.64	2.95	11.65	0.44	7.11	0.05	22.18	0.24	0.12	10.06	0.68	0.91	0.01	96.04		5.74211	0.321435	1.98893	0.0503929	0.861325	0.00613476	4.78974	0.03725	0.0337028	1.85909	0.0386006	15.7287	2.25789	1.98893	0	0.26896	0.592366	88.9938
	Evolved Orangeite (Group-2 kimberlite)	Sibanye, Saffy Shaft	LM6_Phl_1_smallXtl_core_3	39.68	2.67	12.21	0.4	6.48	0.02	23.17	0.05	0.12	10.02	0.56	0.85	0.01	96.24		5.70663	0.288837	2.06956	0.0454828	0.779368	0.00243628	4.96759	0.00770468	0.0334608	1.8384	0.0315605	15.771	2.29337	2.06956	0	0.223807	0.555561	89.9412
	Evolved Orangeite (Group-2 kimberlite)	Sibanye, Saffy Shaft	LM6_Phl_2_smallXtl_core_1	38.73	3.84	9.48	0	14.96	0.21	17.96	0.22	0.13	9.64	0.63	0.67	0	96.47		5.74887	0.428745	1.65844	0	1.85706	0.0264024	3.97423	0.0349892	0.0374132	1.82548	0.0366457	15.6283	2.25113	1.65844	0	0.592698	1.26436	75.8645
	Evolved Orangeite (Group-2 kimberlite)	Sibanye, Saffy Shaft	LM6_Phl_5_smallXtl_core_1	39.39	3.14	11.4	0.25	8.73	0.07	22.04	0.2	0.13	9.9	0.71	0.88	0	96.84		5.6862	0.340956	1.93953	0.0285335	1.05393	0.00855901	4.74307	0.0309345	0.0363854	1.82321	0.0401645	15.7315	2.3138	1.93953	0	0.374269	0.679657	87.4665
	Evolved Orangeite (Group-2 kimberlite)	Sibanye, Saffy Shaft	LM6_Phl_5_smallXtl_core_2	39.55	3.19	9.99	0.07	9.62	0.09	21.15	0.29	0.19	9.93	0.61	0.85	0.01	95.54		5.80194	0.352006	1.72722	0.00811903	1.18022	0.011183	4.6254	0.0455829	0.0540415	1.85841	0.0350675	15.6992	2.19806	1.72722	0	0.470838	0.709378	86.7028
	Evolved Orangeite (Group-2 kimberlite)	Sibanye, Saffy Shaft	LM6_Phl_8_smallXtl_core_1	37.93	3.61	9.75	0.02	12.85	0.17	18.93	0.29	0.1	9.89	0.81	0.72	0	95.07		5.69021	0.407367	1.72387	0.00237222	1.61216	0.0216015	4.23358	0.0466144	0.0290866	1.89281	0.0476187	15.7073	2.30979	1.72387	0	0.585919	1.02624	80.4891
	Evolved Orangeite (Group-2 kimberlite)	Sibanye, Saffy Shaft	LM6_Phl_9_smallXtl_core_1	39.17	3.36	10.85	0.14	10.51	0.08	20.96	0.36	0.1	9.66	0.65	0.81	0	96.65		5.6967	0.367572	1.85975	0.0160982	1.2783	0.00985483	4.54436	0.0560982	0.0281979	1.7923	0.0370451	15.6863	2.3033	1.85975	0	0.44355	0.834747	84.4817
	Evolved Orangeite (Group-2 kimberlite)	Sibanye, Saffy Shaft	LM6_Phl_10_smallXtl_core_1	39.33	2.49	12.05	0.57	6.17	0.02	23.16	0.1	0.11	10.06	0.61	0.8	0.01	95.48		5.70038	0.271464	2.05836	0.0653181	0.747867	0.00245527	5.00415	0.0155295	0.0309115	1.86013	0.0346463	15.7912	2.29962	2.05836	0	0.24126	0.506607	90.8069
	Evolved Orangeite (Group-2 kimberlite)	Sibanye, Saffy Shaft	LM6_Phl_11_smallXtl_core_1	39.48	3.23	10.62	0.03	10.03	0.09	21.28	0.21	0.1	9.81	0.65	0.85	0.01	96.39		5.74703	0.353673	1.82199	0.00345276	1.22103	0.0110968	4.61796	0.0327539	0.0282237	1.8218	0.037079	15.6961	2.25297	1.82199	0	0.430976	0.790056	85.391
	Evolved Orangeite (Group-2 kimberlite)	Sibanye, Saffy Shaft	LM6_Phl_11_smallXtl_core_2	39.17	3.23	10.57	0.09	9.37	0.1	21.45	0.21	0.11	9.66	0.63	0.86	0	95.45		5.74075	0.356082	1.82577	0.0104289	1.14846	0.0124138	4.68656	0.032977	0.0312575	1.80616	0.0361829	15.687	2.25925	1.82577	0	0.433484	0.714971	86.7636
	Evolved Orangeite (Group-2 kimberlite)	Sibanye, Saffy Shaft	LM6_Phl_11_smallXtl_rim_3	38.98	3.42	10.17	0.01	11.34	0.15	20.1	0.39	0.1	9.82	0.71	0.79	0	95.98		5.73961	0.378791	1.76489	0.00116418	1.39641	0.0187077	4.41214	0.0615293	0.0285488	1.84466	0.0409682	15.6874	2.26039	1.76489	0	0.495498	0.900914	83.0434
	Evolved Orangeite (Group-2 kimberlite)	Sibanye, Saffy Shaft	LM6_Phl_12_largeXtl_core_1	40.3	1.76	13.16	1.68	4.55	0.05	23.75	0.03	0.17	10.26	0.26	0.57	0	96.54		5.72547	0.188084	2.20352	0.18871	0.540602	0.0060168	5.03016	0.00456672	0.0468277	1.8596	0.0144753	15.808	2.27453	2.20352	0	0.0710044	0.469597	91.4615
	Evolved Orangeite (Group-2 kimberlite)	Sibanye, Saffy Shaft	LM6_Phl_12_largeXtl_core_2	40	1.74	13.13	1.7	4.6	0.03	23.45	0.01	0.16	10.2	0.24	0.61	0	95.87		5.72767	0.187413	2.21584	0.192462	0.550852	0.00363855	5.00579	0.00153424	0.0444207	1.8633	0.0134672	15.8064	2.27233	2.21584	0	0.0564965	0.494356	91.012
	Evolved Orangeite (Group-2 kimberlite)	Sibanye, Saffy Shaft	LM6_Phl_12_largeXtl_core_3	39.7	1.78	13.03	1.64	4.54	0.01	23.29	0.01	0.12	10.39	0.3	0.54	0	95.35		5.72014	0.192916	2.21267	0.186827	0.547055	0.00122041	5.00262	0.00154381	0.0335231	1.90984	0.0169389	15.8253	2.27986	2.21267	0	0.0671989	0.479856	91.2474
	Evolved Orangeite (Group-2 kimberlite)	Sibanye, Saffy Shaft	LM6_Phl_12_largeXtl_rim_4	39.64	2.63	12.44	0.58	6.13	0.05	23.18	0.07	0.11	10.15	0.51	0.85	0	96.34		5.69237	0.284085	2.1054	0.0658516	0.736172	0.00608161	4.96232	0.0107705	0.0306266	1.85947	0.0286997	15.7819	2.30763	2.1054	0	0.202229	0.533944	90.2853
	Evolved Orangeite (Group-2 kimberlite)	Sibanye, Saffy Shaft	LM6_Phl_12_largeXtl_rim_5	38.98	2.6	12.13	0.52	6	0.08	22.88	0.07	0.1	10.01	0.53	0.88	0.01	94.79		5.69266	0.285614	2.0878	0.0600421	0.732798	0.00989584	4.98129	0.0109534	0.0283153	1.86497	0.0303317	15.7847	2.30734	2.0878	0	0.219534	0.513264	90.6587
	Evolved Orangeite (Group-2 kimberlite)	Sibanye, Saffy Shaft	LM6_Phl_12_largeXtl_rim_6	40.49	2.39	12.74	0.39	5.97	0.05	24.01	0.11	0.13	10.16	0.54	0.93	0.01	97.92		5.71297	0.253656	2.11855	0.0435069	0.704447	0.00597549	5.05032	0.0166297	0.0355635	1.82883	0.0298577	15.8003	2.28703	2.11855	0	0.168478	0.535969	90.4056
	Evolved Orangeite (Group-2 kimberlite)	Sibanye, Saffy Shaft	LM6_Phl_12_largeXtl_core_7	40.02	1.62	13.21	1.63	4.5	0.02	23.76	0.02	0.15	10.16	0.29	0.64	0.01	96.03		5.72025	0.174175	2.22534	0.184206	0.537911	0.00242135	5.06287	0.00306298	0.0415697	1.85266	0.0162437	15.8207	2.27975	2.22534	0	0.0544092	0.483501	91.2826
	Evolved Orangeite (Group-2 kimberlite)	Sibanye, Saffy Shaft	LM6_Phl_12_largeXtl_rim_8	40.28	2.79	11.33	0.19	7.15	0.04	23.2	0.04	0.12	10.23	0.48	0.79	0.01	96.65		5.76949	0.300597	1.91264	0.0215169	0.856473	0.00485286	4.95391	0.00613882	0.0333255	1.86934	0.0269424	15.7552	2.23051	1.91264	0	0.317868	0.538605	90.1938
	Evolved Orangeite (Group-2 kimberlite)	Sibanye, Saffy Shaft	LM6_Phl_12_largeXtl_rim_9	40.31	2.7	11.85	0.28	6.63	0.05	23.52	0.06	0.1	10.17	0.61	0.78	0	97.06		5.74205	0.289302	1.98943	0.0315349	0.789819	0.00603273	4.99464	0.00915761	0.0276186	1.84816	0.0340512	15.7618	2.25795	1.98943	0	0.26852	0.521299	90.5492
	Evolved Orangeite (Group-2 kimberlite)	Sibanye, Saffy Shaft	LM6_Phl_12_largeXtl_rim_10	40.25	2.55	12.54	0.58	6.01	0.05	23.47	0.07	0.09	10.19	0.6	0.86	0	97.26		5.72127	0.272647	2.10078	0.0651829	0.714432	0.00601986	4.97339	0.0106611	0.0248037	1.84785	0.0334215	15.7705	2.27873	2.10078	0	0.17795	0.536482	90.2632
	Evolved Orangeite (Group-2 kimberlite)	Sibanye, Saffy Shaft	LM6_Phl_12_largeXtl_rim_11	40.06	3.23	10.88	0.11	8.81	0.07	22.19	0.07	0.12	9.96	0.72	0.91	0	97.13		5.75774	0.349202	1.843	0.0125001	1.05895	0.00852175	4.75457	0.0107799	0.0334403	1.82627	0.0405529	15.6955	2.24226	1.843	0	0.399256	0.659698	87.8156
	Evolved Orangeite (Group-2 kimberlite)	Sibanye, Saffy Shaft	LM6_Phl_12_largeXtl_rim_12	39.54	3.36	10.57	0.02	10.56	0.1	20.82	0.27	0.11	9.79	0.67	0.82	0.01	96.64		5.75345	0.36776	1.81268	0.00230092	1.28504	0.0123248	4.51632	0.0420952	0.0310336	1.81735	0.0382045	15.6786	2.24655	1.81268	0	0.433867	0.851169	84.1421
	Evolved Orangeite (Group-2 kimberlite)	Sibanye, Saffy Shaft	LM6_Phl_12_largeXtl_rim_13	38.49	3.89	8.63	0	19.1	0.23	15.89	0.14	0.19	9.49	0.49	0.44	0	96.98		5.76417	0.438199	1.52319	0	2.39211	0.0291747	3.54752	0.0224643	0.0551683	1.81309	0.0287563	15.6138	2.23583	1.52319	0	0.712639	1.67947	67.8692
	Evolved Orangeite (Group-2 kimberlite)	Sibanye, Saffy Shaft	LM6_Phl_13_largeXtl_zone_rounded_core_1	38.66	3.08	13.33	0.06	8.35	0.09	21.13	0.01	0.22	10	0.62	0.71	0.01	96.27		5.62054	0.336822	2.28403	0.00689678	1.01523	0.0110828	4.57961	0.00155773	0.0620135	1.85473	0.0353229	15.8078	2.37946	2.28403	0	0.0954269	0.919799	83.2746
	Evolved Orangeite (Group-2 kimberlite)	Sibanye, Saffy Shaft	LM6_Phl_13_largeXtl_zone_rounded_core_2	38.82	3.12	13.33	0.06	8.38	0.1	21.19	0.02	0.23	9.93	0.64	0.75	0.01	96.58		5.62532	0.340079	2.27655	0.0068742	1.01554	0.0122739	4.57757	0.00310526	0.06462	1.83572	0.0363429	15.794	2.37468	2.27655	0	0.0981269	0.917409	83.3046
	Evolved Orangeite (Group-2 kimberlite)	Sibanye, Saffy Shaft	LM6_Phl_13_largeXtl_zone_rounded_core_3	39.12	3.03	13.31	0.06	8.47	0.03	21.35	0.03	0.21	10	0.63	0.76	0	97		5.64256	0.32874	2.26261	0.00684238	1.02169	0.00366512	4.59079	0.00463634	0.0587278	1.8401	0.0356095	15.796	2.35744	2.26261	0	0.0948282	0.926864	83.2018
	Evolved Orangeite (Group-2 kimberlite)	Sibanye, Saffy Shaft	LM6_Phl_13_largeXtl_zone_rounded_core_4	39.33	3.11	13.52	0.08	8.38	0.04	21.5	0.03	0.22	9.95	0.58	0.77	0.01	97.52		5.63574	0.335213	2.28328	0.00906351	1.00422	0.00485486	4.5928	0.00460601	0.0611219	1.81893	0.0325689	15.7824	2.36426	2.28328	0	0.0809755	0.923249	83.2625
	Evolved Orangeite (Group-2 kimberlite)	Sibanye, Saffy Shaft	LM6_Phl_13_largeXtl_zone_rounded_core_5	38.9	3.02	13.54	0.06	8.68	0.06	21.15	0.05	0.17	9.87	0.67	0.78	0.01	96.96		5.62234	0.328328	2.30644	0.00685643	1.04917	0.00734528	4.55712	0.0077431	0.0476392	1.81991	0.0379481	15.7908	2.37766	2.30644	0	0.0712165	0.977957	82.3316
	Evolved Orangeite (Group-2 kimberlite)	Sibanye, Saffy Shaft	LM6_Phl_13_largeXtl_zone_margin_6	38.35	3.21	13.28	0.16	8.7	0.07	20.88	0.04	0.14	9.94	0.68	0.77	0	96.22		5.59204	0.352082	2.28223	0.0184461	1.06092	0.00864555	4.53887	0.00624945	0.0395804	1.84908	0.0388563	15.787	2.40796	2.28223	0	0.125731	0.935192	82.9159
	Evolved Orangeite (Group-2 kimberlite)	Sibanye, Saffy Shaft	LM6_Phl_13_largeXtl_zone_margin_7	39.14	2.61	12.76	0.45	7.14	0.06	22.43	0.12	0.12	9.28	0.59	0.78	0.01	95.49		5.67867	0.284839	2.18188	0.0516199	0.86633	0.00737337	4.8514	0.0186545	0.0337562	1.71766	0.0335448	15.7257	2.32133	2.18188	0	0.139451	0.726879	86.9695
	Evolved Orangeite (Group-2 kimberlite)	Sibanye, Saffy Shaft	LM6_Phl_13_largeXtl_zone_margin_8	40.13	2.83	11.72	0.23	7.05	0.07	23.11	0.18	0.11	9.52	0.55	0.89	0	96.39		5.7542	0.305236	1.98061	0.0260749	0.845405	0.00850165	4.94001	0.0276545	0.0305813	1.74148	0.0309048	15.6907	2.2458	1.98061	0	0.26519	0.580215	89.4893
	Evolved Orangeite (Group-2 kimberlite)	Sibanye, Saffy Shaft	LM6_Phl_13_largeXtl_zone_outer-margin_9	39.64	3.05	11.12	0.19	7.74	0.05	22.49	0.3	0.1	10.09	0.68	0.98	0	96.43		5.72909	0.331578	1.89414	0.0217113	0.935519	0.00612085	4.84567	0.0464569	0.028022	1.86041	0.0385131	15.7372	2.27091	1.89414	0	0.376765	0.558755	89.6612
	Evolved Orangeite (Group-2 kimberlite)	Sibanye, Saffy Shaft	LM6_Phl_13_largeXtl_zone_outer-margin_10	39.65	3.12	11.24	0.18	7.84	0.02	22.28	0.18	0.1	9.95	0.72	0.98	0	96.26		5.74009	0.339753	1.91777	0.0206028	0.949185	0.00245242	4.80842	0.0279206	0.0280687	1.83765	0.0408466	15.7128	2.25991	1.91777	0	0.342141	0.607044	88.7905
	Evolved Orangeite (Group-2 kimberlite)	Sibanye, Saffy Shaft	LM6_Phl_13_largeXtl_zone_outer-margin_11	39.84	3.25	10.42	0.03	9.3	0.07	21.56	0.13	0.1	9.97	0.71	0.92	0.01	96.31		5.79175	0.355391	1.78531	0.00344818	1.13066	0.00861941	4.67252	0.0202493	0.0281863	1.84906	0.0404479	15.6856	2.20825	1.78531	0	0.422946	0.707716	86.846
	Evolved Orangeite (Group-2 kimberlite)	Sibanye, Saffy Shaft	LM6_Phl_14_largeXtl_core_1	39.76	1.68	13.25	1.7	4.57	0.04	23.51	0.03	0.13	10.18	0.31	0.56	0	95.72		5.70369	0.181281	2.24017	0.192814	0.548258	0.00486025	5.02776	0.00461113	0.0361576	1.86304	0.0174269	15.8201	2.29631	2.24017	0	0.0561405	0.492118	91.0846
	Evolved Orangeite (Group-2 kimberlite)	Sibanye, Saffy Shaft	LM6_Phl_14_largeXtl_core_2	41.67	1.74	12.87	1.25	4.8	0.03	24.68	0.07	0.17	10.09	0.32	0.49	0.01	98.19		5.79615	0.182053	2.10984	0.137469	0.558363	0.00353449	5.11768	0.0104326	0.0458471	1.79049	0.0174427	15.7693	2.20385	2.10984	0	0.094009	0.464354	91.6813
	Evolved Orangeite (Group-2 kimberlite)	Sibanye, Saffy Shaft	LM6_Phl_14_largeXtl_core_3	39.73	1.69	13.19	1.64	4.64	0.04	23.44	0.03	0.17	10.27	0.33	0.58	0	95.75		5.70455	0.182525	2.23205	0.186177	0.557161	0.00486466	5.01733	0.00461531	0.0473259	1.88121	0.018568	15.8364	2.29545	2.23205	0	0.0634017	0.493759	91.0406
	Evolved Orangeite (Group-2 kimberlite)	Sibanye, Saffy Shaft	LM6_Phl_15_close_to_contact_largeXtl_core_1	39.5	1.69	13.01	1.58	4.67	0.03	23.34	0.02	0.15	10.27	0.26	0.59	0	95.11		5.70879	0.183724	2.21605	0.180544	0.564448	0.00367247	5.02875	0.00309709	0.0420325	1.89357	0.0147254	15.8394	2.29121	2.21605	0	0.0751573	0.48929	91.1329
	Evolved Orangeite (Group-2 kimberlite)	Sibanye, Saffy Shaft	LM6_Phl_15_close_to_contact_largeXtl_core_2	39.12	1.74	12.6	1.61	4.97	0.04	23.04	0.03	0.15	10.3	0.31	0.58	0.01	94.5		5.70337	0.190816	2.165	0.185583	0.605966	0.00493949	5.00757	0.0046863	0.0424005	1.91573	0.017711	15.8438	2.29663	2.165	0	0.13163	0.474336	91.3472
	Evolved Orangeite (Group-2 kimberlite)	Sibanye, Saffy Shaft	LM6_Phl_15_close_to_contact_largeXtl_rim_3	38.98	1.69	12.74	1.65	4.73	0.04	23.12	0.07	0.15	10.42	0.32	0.68	0	94.59		5.68438	0.185379	2.18961	0.190241	0.576849	0.00494072	5.02622	0.0109374	0.0424111	1.93854	0.0182868	15.8678	2.31562	2.18961	0	0.126014	0.450835	91.7687
	Evolved Orangeite (Group-2 kimberlite)	Sibanye, Saffy Shaft	LM6_Phl_15_close_to_contact_largeXtl_rim_4	38.97	1.72	12.69	1.69	4.66	0.01	22.93	0.06	0.15	10.35	0.29	0.63	0.01	94.16		5.70212	0.189307	2.18838	0.195511	0.570232	0.00123935	5.00176	0.00940663	0.0425544	1.93202	0.0166285	15.8492	2.29788	2.18838	0	0.109493	0.460739	91.5654
	Evolved Orangeite (Group-2 kimberlite)	Sibanye, Saffy Shaft	LM6_Phl_15_close_to_contact_largeXtl_rim_5	39.97	2.88	11.73	0.15	7.52	0.08	22.88	0.09	0.11	10.15	0.57	0.91	0	97.04		5.7256	0.310322	1.98034	0.0169886	0.900875	0.00970658	4.88602	0.0138136	0.0305511	1.85489	0.031997	15.7611	2.2744	1.98034	0	0.294057	0.606818	88.9526
	Evolved Orangeite (Group-2 kimberlite)	Sibanye, Saffy Shaft	LM6_Phl_15_close_to_contact_largeXtl_rim_6	39.68	2.01	12.85	1.4	5.08	0.03	23.42	0.01	0.13	10.25	0.36	0.71	0	95.93		5.69785	0.217104	2.17469	0.158945	0.610046	0.0036488	5.01347	0.00153857	0.0361934	1.87771	0.0202577	15.8114	2.30215	2.17469	0	0.12746	0.482586	91.2194
	Evolved Orangeite (Group-2 kimberlite)	Sibanye, Saffy Shaft	LM6_Phl_16_close_to_contact_largeXtl_core_1	40.11	1.75	13.08	1.73	4.53	0.04	23.53	0.04	0.18	10.23	0.3	0.58	0	96.1		5.72883	0.188012	2.20179	0.195361	0.541092	0.00483908	5.01011	0.00612139	0.0498463	1.86403	0.0167912	15.8068	2.27117	2.20179	0	0.0693762	0.471716	91.3949
	Evolved Orangeite (Group-2 kimberlite)	Sibanye, Saffy Shaft	LM6_Phl_16_close_to_contact_largeXtl_core_2	39.75	1.74	13.05	1.71	4.55	0.03	23.52	0.01	0.15	10.41	0.32	0.56	0.01	95.81		5.70272	0.187771	2.20654	0.193964	0.545904	0.00364549	5.03031	0.00153717	0.0417238	1.90529	0.0179905	15.8374	2.29728	2.20654	0	0.0907403	0.455164	91.7024
	Evolved Orangeite (Group-2 kimberlite)	Sibanye, Saffy Shaft	LM6_Phl_16_close_to_contact_largeXtl_core_3	39.96	1.73	12.93	1.65	4.56	0.02	23.6	0.03	0.12	10.36	0.31	0.56	0	95.83		5.72541	0.186449	2.18341	0.186915	0.546394	0.00242717	5.04087	0.00460552	0.0333357	1.89368	0.0174057	15.8209	2.27459	2.18341	0	0.0911812	0.455212	91.7175
	Evolved Orangeite (Group-2 kimberlite)	Sibanye, Saffy Shaft	LM6_Phl_16_close_to_contact_largeXtl_rim_4	39.99	2.68	11.88	0.2	6.88	0.07	23.18	0.15	0.11	10.03	0.48	0.78	0	96.43		5.73663	0.289183	2.00852	0.0226837	0.825379	0.00850536	4.95714	0.0230554	0.0305946	1.83557	0.0269832	15.7642	2.26337	2.00852	0	0.254848	0.570531	89.6786
	Evolved Orangeite (Group-2 kimberlite)	Sibanye, Saffy Shaft	LM6_Phl_16_close_to_contact_largeXtl_rim_5	39.86	2.63	11.45	0.2	6.67	0.05	23.06	0.1	0.11	9.99	0.57	0.93	0.02	95.64		5.77283	0.28651	1.9544	0.0229013	0.807862	0.00613354	4.97878	0.0155177	0.0308881	1.84579	0.03235	15.754	2.22717	1.9544	0	0.272772	0.53509	90.2956
	Evolved Orangeite (Group-2 kimberlite)	Sibanye, Saffy Shaft	LM6_Phl_16_close_to_contact_largeXtl_rim_6	39.06	2.59	12.21	0.44	6.1	0.03	23.02	0.06	0.1	9.99	0.58	0.98	0	95.16		5.68817	0.283709	2.09561	0.0506608	0.742899	0.00370042	4.99756	0.00936199	0.028235	1.85597	0.0330991	15.789	2.31183	2.09561	0	0.216215	0.526684	90.4659
	Evolved Orangeite (Group-2 kimberlite)	Sibanye, Saffy Shaft	LM6_Phl_17_close_to_contact_largeXtl_core_1	39.98	1.85	13.12	1.71	4.66	0.02	23.59	0.08	0.15	10.12	0.31	0.54	0	96.13		5.70539	0.198585	2.20664	0.192938	0.556145	0.00241747	5.0186	0.0122323	0.0415032	1.84242	0.0173361	15.7942	2.29461	2.20664	0	0.0879668	0.468178	91.4672
	Evolved Orangeite (Group-2 kimberlite)	Sibanye, Saffy Shaft	LM6_Phl_17_close_to_contact_largeXtl_core_2	39.77	1.96	13.21	1.53	4.91	0.04	23.54	0.07	0.14	10.22	0.38	0.65	0	96.42		5.67698	0.210451	2.22239	0.172676	0.586142	0.00483628	5.00934	0.0107062	0.0387469	1.86113	0.0212566	15.8147	2.32302	2.22239	0	0.100629	0.485513	91.1642
	Evolved Orangeite (Group-2 kimberlite)	Sibanye, Saffy Shaft	LM6_Phl_17_close_to_contact_largeXtl_rim_3	39.45	2.54	12.9	1.04	5.44	0.04	23.27	0.05	0.12	10.08	0.56	0.84	0	96.33		5.657	0.273972	2.18014	0.11791	0.652375	0.00485835	4.97448	0.0076822	0.0333632	1.84402	0.0314684	15.7773	2.343	2.18014	0	0.162862	0.489514	91.0411
	Evolved Orangeite (Group-2 kimberlite)	Sibanye, Saffy Shaft	LM6_Phl_20_close_to_contact_smallXtl_core_2	39.39	2.98	11.5	0.29	8.27	0.1	22.38	0.11	0.09	9.41	0.62	0.83	0.01	95.98		5.705	0.324653	1.96301	0.0332083	1.00169	0.0122676	4.83217	0.0170702	0.0252731	1.7387	0.0351892	15.6882	2.295	1.96301	0	0.331989	0.669704	87.8277

## Sheet: Suppl. Tab. 1d - clinopyroxene
	Tappe, S., Shaikh, A.M., Wilson, A.H. and Stracke, A. 2021. Genesis of ultrapotassic rocks on the Kaapvaal craton: deepening the orangeite versus lamproite debate. Geological Society, London, Special Publications.
	Supplementary Table 1 (d). EPMA-determined major and minor element compositions of clinopyroxene in wt.%
				Oxides (wt.%)													Cations per formula unit based on 6 oxygens
	Dyke rock	Location	Sample and grain / spot	SiO2	TiO2	Al2O3	Cr2O3	FeO	MnO	NiO	MgO	CaO	Na2O	K2O	Total		Si	Ti	Al	Cr	Fe	Mn	Ni	Mg	Ca	Na	K	Total	Mg#	En	Fs	Wo
	Orangeite (Group-2 kimberlite)	Impala, 20#Shaft	IP20-01_cpx_xx1_co1	52.97	0.91	0.45	0.09	4.32	0.13	0.05	15.83	24.62	0.61	0.01	99.99		1.94042	0.0250749	0.0194282	0.00260667	0.132345	0.00403365	0.00147347	0.864487	0.96634	0.0433254	0.000467337	4	86.7234	0.470368	0.02262	0.507012
	Orangeite (Group-2 kimberlite)	Impala, 20#Shaft	IP20-01_cpx_xx1_co2	52.87	0.81	0.43	0.1	4.33	0.12	0.01	15.71	24.53	0.62	0	99.53		1.94552	0.0224204	0.0186488	0.00290941	0.133252	0.00374022	0.000296027	0.861816	0.967164	0.0442349	0	4	86.6088	0.467521	0.0251999	0.507279
	Orangeite (Group-2 kimberlite)	Impala, 20#Shaft	IP20-01_cpx_xx1_co3	53.36	0.25	0.13	0.04	5.45	0.27	0.02	14.97	24.39	0.63	0	99.51		1.97252	0.0069515	0.00566375	0.00116908	0.168485	0.00845393	0.000594759	0.824972	0.966037	0.0451537	0	4	83.0405	0.443633	0.0479165	0.508451
	Orangeite (Group-2 kimberlite)	Impala, 20#Shaft	IP20-01_cpx_xx1_rim1	53.63	0.04	0.06	0.01	3.71	0.18	0.03	16.06	25.37	0.23	0	99.32		1.97553	0.00110833	0.00260484	0.000291242	0.11429	0.00561613	0.000889001	0.881928	1.00132	0.0164267	0	4	88.5276	0.460798	0.0282304	0.510971
	Orangeite (Group-2 kimberlite)	Impala, 20#Shaft	IP20-01_cpx_xx1_rim2	53.64	0.01	0.05	0.01	3.36	0.17	0.02	16.27	25.63	0.25	0.01	99.42		1.97028	0.000276294	0.00216453	0.000290414	0.103214	0.00528904	0.000590982	0.890919	1.0087	0.0178043	0.000468601	4	89.6177	0.46923	0.0150126	0.515757
	Orangeite (Group-2 kimberlite)	Impala, 20#Shaft	IP20-01_cpx_xx2_co1	52.99	0.21	0.14	0.01	5.29	0.25	0.04	15.17	24.56	0.55	0.01	99.22		1.96263	0.00585054	0.00611121	0.000292835	0.163855	0.00784284	0.00119182	0.83761	0.974651	0.0394961	0.000472508	4	83.6385	0.453256	0.0363887	0.510355
	Orangeite (Group-2 kimberlite)	Impala, 20#Shaft	IP20-01_cpx_xx2_co2	52.61	0.23	0.15	0.01	5.31	0.25	0	15.49	24.67	0.54	0	99.26		1.94506	0.00639624	0.00653598	0.000292309	0.164179	0.00782876	0	0.853744	0.977259	0.0387084	0	4	83.8712	0.469694	0.0193679	0.510938
	Orangeite (Group-2 kimberlite)	Impala, 20#Shaft	IP20-01_cpx_xx2_rim1	52.71	0.27	0.17	0.01	4.75	0.17	0.01	15.59	24.77	0.53	0	98.98		1.95123	0.00751819	0.00741687	0.000292682	0.147052	0.00533034	0.000297798	0.860349	0.98247	0.0380399	0	4	85.4029	0.468652	0.0186436	0.512705
	Orangeite (Group-2 kimberlite)	Impala, 20#Shaft	IP20-01_cpx_xx3_co1	52.5	0.51	0.34	0.03	3.97	0.16	0.01	16.22	25.01	0.37	0	99.12		1.93608	0.0141471	0.0147774	0.000874709	0.122437	0.00499773	0.000296667	0.891716	0.988221	0.0264553	0	4	87.9271	0.484038	0.00655902	0.509403
	Orangeite (Group-2 kimberlite)	Impala, 20#Shaft	IP20-01_cpx_xx3_co2	52.88	0.35	0.19	0.05	3.95	0.16	0.03	16.12	25.04	0.36	0.01	99.14		1.95055	0.00971106	0.0082599	0.00145819	0.121849	0.00499891	0.00089021	0.886427	0.989639	0.0257463	0.000470577	4	87.9151	0.476011	0.0138936	0.510096
	Orangeite (Group-2 kimberlite)	Impala, 20#Shaft	IP20-01_cpx_xx3_co3	52.94	0.34	0.22	0.06	4.02	0.18	0.02	16.11	25.03	0.37	0	99.29		1.95017	0.00942108	0.00955139	0.00174751	0.123844	0.0056163	0.000592685	0.884701	0.98793	0.0264264	0	4	87.7205	0.475615	0.0149985	0.509387
	Orangeite (Group-2 kimberlite)	Impala, 20#Shaft	IP20-01_cpx_xx3_co4	53	0.36	0.21	0.07	3.99	0.17	0.01	16.36	25.14	0.34	0	99.65		1.94411	0.009933	0.00907862	0.00203012	0.122399	0.00528182	0.000295087	0.894624	0.988068	0.0241808	0	4	87.965	0.482499	0.00939103	0.50811
	Orangeite (Group-2 kimberlite)	Impala, 20#Shaft	IP20-01_cpx_xx3_rim1	52.53	0.3	0.2	0.02	3.88	0.17	0.02	16.33	25.21	0.36	0	99.02		1.9372	0.00832187	0.00869264	0.000583143	0.119662	0.00531012	0.000593338	0.897769	0.99613	0.0257404	0	4		0.487309	0	0.512691
	Orangeite (Group-2 kimberlite)	Impala, 20#Shaft	IP20-01_cpx_xx3_rim2	52.48	0.31	0.21	0.02	3.94	0.17	0.02	16.49	25.09	0.38	0.02	99.13		1.9319	0.00858393	0.009111	0.000582104	0.121296	0.00530066	0.00059228	0.904949	0.989621	0.027122	0.000939261	4		0.490991	0	0.509009
	Orangeite (Group-2 kimberlite)	Impala, 20#Shaft	IP20-01_cpx_xx4_co1	53	0.52	0.34	0.01	5.1	0.13	0.02	15.15	23.82	0.95	0.01	99.05		1.96018	0.0144663	0.0148202	0.000292415	0.157743	0.00407243	0.000595054	0.835306	0.943928	0.0681226	0.00047183	4	84.1153	0.462148	0.029632	0.50822
	Orangeite (Group-2 kimberlite)	Impala, 20#Shaft	IP20-01_cpx_xx4_co2	53.11	0.54	0.33	0.01	5.13	0.15	0.04	15.2	24.01	0.99	0	99.51		1.95495	0.0149516	0.0143163	0.000291031	0.15792	0.00467671	0.00118448	0.834096	0.946955	0.070655	0	4	84.0809	0.465289	0.0232528	0.511458
	Orangeite (Group-2 kimberlite)	Impala, 20#Shaft	IP20-01_cpx_xx4_rim1	53.14	0.69	0.11	0.01	6.28	0.22	0.03	14.54	23.19	1.12	0	99.33		1.96899	0.0192311	0.00480365	0.000292956	0.1946	0.00690454	0.000894231	0.803155	0.920662	0.0804615	0	4	80.4962	0.44429	0.0529316	0.502779
	Orangeite (Group-2 kimberlite)	Impala, 20#Shaft	IP20-01_cpx_xx4_rim2	52.03	0.84	0.1	0.01	7.02	0.3	0.03	14.02	23.17	1.15	0	98.67		1.947	0.0236442	0.00441029	0.000295863	0.219689	0.00950872	0.000903106	0.782117	0.928997	0.0834366	0	4	78.0707	0.443377	0.0466228	0.51
	Orangeite (Group-2 kimberlite)	Impala, 20#Shaft	IP20-01_cpx_xx4_rim3	51.86	0.78	0.11	0	6.96	0.27	0.04	14.02	23.2	1.1	0	98.34		1.94689	0.0220261	0.00486696	0	0.218514	0.00858545	0.00120802	0.784639	0.9332	0.0800663	0	4	78.2173	0.443822	0.0459046	0.510274
	Orangeite (Group-2 kimberlite)	Impala, 20#Shaft	IP20-01_cpx_xx4_rim4	52.03	0.56	0.13	0.02	6.66	0.29	0.02	14.31	23.4	0.94	0.01	98.37		1.95066	0.0157924	0.00574415	0.000592838	0.208815	0.00920905	0.000603202	0.799796	0.939983	0.0683286	0.000478291	4	79.2968	0.447946	0.0443836	0.507671
	Orangeite (Group-2 kimberlite)	Impala, 20#Shaft	IP20-01_cpx_xx4_rim5	52.99	0.22	0.16	0.01	4.15	0.15	0.02	15.89	25.21	0.37	0.01	99.18		1.95543	0.00610665	0.00695861	0.00029176	0.128072	0.00468844	0.000593722	0.874145	0.996775	0.0264726	0.000470774	4	87.2211	0.468988	0.01687	0.514142
	Orangeite (Group-2 kimberlite)	Impala, 20#Shaft	IP20-01_cpx_xx4_rim6	53.41	0.25	0.13	0	3.83	0.09	0.02	16.01	25.36	0.33	0.01	99.44		1.96471	0.00691749	0.00563604	0	0.117824	0.00280419	0.000591849	0.877969	0.999543	0.0235362	0.000469289	4	88.1678	0.464081	0.0225743	0.513345
	Orangeite (Group-2 kimberlite)	Impala, 20#Shaft	IP20-01_cpx_xx5_co1	53.34	0.21	0.13	0.06	4.34	0.22	0.04	15.95	24.93	0.42	0.01	99.65		1.95989	0.00580405	0.0056296	0.00174305	0.133361	0.00684686	0.00118235	0.873679	0.981472	0.029921	0.000468753	4	86.7571	0.469068	0.0224074	0.508524
	Orangeite (Group-2 kimberlite)	Impala, 20#Shaft	IP20-01_cpx_xx5_co2	53.08	0.27	0.13	0.05	4.52	0.18	0.01	15.7	24.87	0.52	0.01	99.34		1.95705	0.00748804	0.00564898	0.00145754	0.13937	0.00562125	0.000296604	0.862945	0.98248	0.0371725	0.000470366	4	86.0952	0.466993	0.0205157	0.512491
	Orangeite (Group-2 kimberlite)	Impala, 20#Shaft	IP20-01_cpx_xx5_co3	53.13	0.38	0.14	0.04	4.59	0.17	0.04	15.59	24.78	0.58	0.01	99.45		1.95769	0.0105322	0.00607977	0.00116531	0.141441	0.0053057	0.00118569	0.856372	0.978323	0.0414361	0.000470077	4	85.8249	0.463872	0.0234131	0.512715
	Orangeite (Group-2 kimberlite)	Impala, 20#Shaft	IP20-01_cpx_xx5_co4	52.55	0.52	0.21	0.02	5.14	0.21	0.05	15.3	24.42	0.71	0.01	99.14		1.94478	0.0144755	0.0091595	0.000585202	0.159081	0.00658272	0.00148858	0.844113	0.968321	0.0509451	0.00047213	4	84.1425	0.466981	0.0198673	0.513152
	Orangeite (Group-2 kimberlite)	Impala, 20#Shaft	IP20-01_cpx_xx5_rim1	53.11	0.37	0.17	0.03	3.93	0.12	0.04	15.94	25.05	0.45	0.03	99.24		1.95713	0.010256	0.00738325	0.000874065	0.121114	0.00374554	0.00118579	0.875677	0.989072	0.0321516	0.00141036	4	87.8496	0.470107	0.0164179	0.513475
	Orangeite (Group-2 kimberlite)	Impala, 20#Shaft	IP20-01_cpx_xx5_rim2	53.65	0.33	0.16	0.06	3.48	0.1	0.01	16.41	25.41	0.3	0.02	99.93		1.961	0.00907309	0.0068926	0.00173396	0.106377	0.00309597	0.000294045	0.894188	0.995152	0.0212606	0.000932616	4	89.3683	0.472523	0.0174159	0.510062
	Orangeite (Group-2 kimberlite)	Impala, 20#Shaft	IP20-01_cpx_xx5_rim3	53.32	0.32	0.17	0.08	3.3	0.08	0.03	16.36	25.29	0.31	0.01	99.27		1.96072	0.00885135	0.00736768	0.00232592	0.101485	0.00249176	0.000887469	0.896854	0.996442	0.0221022	0.000469128	4	89.8347	0.474368	0.0146817	0.51095
	Orangeite (Group-2 kimberlite)	Impala, 20#Shaft	IP20-01_cpx_xx6_co1	53.15	0.26	0.13	0.08	4.74	0.24	0.03	15.38	24.65	0.47	0.04	99.17		1.96751	0.00723969	0.00567168	0.00234144	0.146741	0.00752513	0.000893388	0.848754	0.977703	0.0337333	0.00188903	4	85.2595	0.45392	0.0367027	0.509378
	Orangeite (Group-2 kimberlite)	Impala, 20#Shaft	IP20-01_cpx_xx6_co2	53.03	0.27	0.11	0.03	4.98	0.24	0.03	15.37	24.6	0.51	0.01	99.18		1.96314	0.00751842	0.0047993	0.000878072	0.154177	0.00752541	0.000893422	0.848234	0.975757	0.0366056	0.000472275	4	84.6194	0.456348	0.0344821	0.50917
	Orangeite (Group-2 kimberlite)	Impala, 20#Shaft	IP20-01_cpx_xx6_co3	53.36	0.17	0.1	0.13	3.51	0.11	0.01	16.29	25.34	0.3	0	99.32		1.96244	0.00470287	0.00433448	0.0037801	0.107956	0.0034266	0.000295861	0.89313	0.998538	0.0213919	0	4	89.2161	0.47311	0.0153471	0.511543
	Orangeite (Group-2 kimberlite)	Impala, 20#Shaft	IP20-01_cpx_xx6_co4	53.58	0.14	0.11	0.16	3.52	0.12	0.01	16.35	25.45	0.31	0.01	99.76		1.96171	0.00385561	0.00474658	0.0046316	0.107779	0.00372137	0.000294536	0.892405	0.998382	0.022006	0.000467086	4	89.2241	0.474136	0.0137165	0.512147
	Orangeite (Group-2 kimberlite)	Impala, 20#Shaft	IP20-01_cpx_xx6_co5	53.17	0.17	0.12	0.14	3.51	0.11	0	16.24	25.21	0.31	0.01	98.99		1.96174	0.00471798	0.00521808	0.00408396	0.108303	0.00343761	0	0.893249	0.996607	0.022176	0.000470694	4	89.1865	0.474078	0.014791	0.511131
	Orangeite (Group-2 kimberlite)	Impala, 20#Shaft	IP20-01_cpx_xx6_co6	53.33	0.26	0.17	0.12	3.28	0.09	0.01	16.59	25.28	0.34	0	99.47		1.95481	0.00716867	0.00734407	0.0034777	0.100546	0.00279424	0.000294875	0.906548	0.992856	0.0241634	0	4	90.0162	0.484129	0.00595767	0.509914
	Orangeite (Group-2 kimberlite)	Impala, 20#Shaft	IP20-03_cpx_xx1_co1	52.57	0.47	0.14	0.02	3.68	0.15	0.05	16.42	24.94	0.43	0	98.87		1.94014	0.0130475	0.00608947	0.000583586	0.11358	0.00468896	0.00148447	0.903403	0.98621	0.0307689	0	4		0.489684	0	0.510316
	Orangeite (Group-2 kimberlite)	Impala, 20#Shaft	IP20-03_cpx_xx1_co2	53.53	0.07	0.01	0.02	1.61	0.07	0.01	17.47	25.95	0.15	0	98.89		1.96147	0.00192937	0.000431856	0.000579419	0.0493366	0.00217256	0.000294774	0.954309	1.01882	0.0106567	0	4		0.488566	0	0.511434
	Orangeite (Group-2 kimberlite)	Impala, 20#Shaft	IP20-03_cpx_xx1_co3	52.77	0.48	0.13	0.01	3.66	0.14	0.02	16.22	25.01	0.31	0	98.75		1.95324	0.0133642	0.00567111	0.00029265	0.113295	0.00438921	0.000595532	0.895019	0.991882	0.0222474	0	4	88.7639	0.47513	0.0160467	0.508824
	Orangeite (Group-2 kimberlite)	Impala, 20#Shaft	IP20-03_cpx_xx1_co4	53.41	0.35	0.02	0.02	2.62	0.09	0	16.8	25.36	0.3	0	98.97		1.96398	0.00968091	0.000866763	0.000581466	0.0805705	0.00280315	0	0.920951	0.999174	0.0213887	0	4	91.9552	0.484266	0.0041847	0.51155
	Orangeite (Group-2 kimberlite)	Impala, 20#Shaft	IP20-03_cpx_xx1_co5	52.52	0.57	0.14	0.01	3.82	0.1	0.01	16.17	24.74	0.44	0.01	98.53		1.94719	0.0158961	0.00611741	0.000293132	0.118442	0.00314032	0.000298256	0.89373	0.982789	0.0316289	0.000472987	4	88.2982	0.480879	0.0101836	0.508937
	Orangeite (Group-2 kimberlite)	Impala, 20#Shaft	IP20-03_cpx_xx1_co6	52.49	0.58	0.16	0.03	3.75	0.11	0.03	16.05	24.96	0.41	0	98.57		1.94664	0.0161797	0.00699334	0.00087965	0.116306	0.00345535	0.000895027	0.887353	0.991815	0.0294809	0	4	88.4118	0.476475	0.0109221	0.512603
	Orangeite (Group-2 kimberlite)	Impala, 20#Shaft	IP20-03_cpx_xx2_co1	52.01	0.51	0.13	0.03	3.76	0.17	0	16.26	24.82	0.42	0.01	98.12		1.9349	0.0142717	0.00569994	0.000882413	0.116982	0.00535685	0	0.901788	0.98935	0.0302948	0.00047461	4		0.488843	0	0.511157
	Orangeite (Group-2 kimberlite)	Impala, 20#Shaft	IP20-03_cpx_xx2_co2	52.15	0.54	0.12	0.02	3.79	0.16	0.05	16.15	24.85	0.4	0	98.23		1.93981	0.0151089	0.00526068	0.000588186	0.117897	0.00504098	0.00149617	0.895551	0.990396	0.0288478	0	4	88.3667	0.485233	0.00256972	0.512198
	Orangeite (Group-2 kimberlite)	Impala, 20#Shaft	IP20-03_cpx_xx2_co3	52.3	0.05	0.02	0.03	1.92	0.06	0.03	17.46	25.55	0.21	0	97.63		1.93924	0.00139454	0.000874006	0.000879487	0.0595374	0.00188439	0.000894862	0.965129	1.01507	0.0150972	0	4		0.493141	0	0.506859
	Orangeite (Group-2 kimberlite)	Impala, 20#Shaft	IP20-03_cpx_xx2_co4	53.4	0.1	0	0.01	2.64	0.27	0.03	16.74	25.2	0.46	0	98.85		1.96338	0.00276564	0	0.000290698	0.0811757	0.00840845	0.000887339	0.917551	0.99275	0.032792	0	4		0.486516	0	0.513484
	Orangeite (Group-2 kimberlite)	Impala, 20#Shaft	IP20-03_cpx_xx3_co1	53.39	0.03	0	0.01	1.42	0.23	0.01	17.82	25.98	0.13	0.01	99.03		1.95071	0.000824495	0	0.000288877	0.0433892	0.00711788	0.000293927	0.97063	1.01707	0.00920925	0.000466121	4		0.492532	0	0.507468
	Orangeite (Group-2 kimberlite)	Impala, 20#Shaft	IP20-03_cpx_xx3_co2	53.14	0.05	0.01	0.02	1.8	0.08	0.02	17.81	25.73	0.16	0.02	98.84		1.94564	0.00137703	0.000431515	0.000578961	0.0551153	0.00248096	0.000589082	0.972112	1.00939	0.0113581	0.00093419	4		0.496082	0	0.503918
	Orangeite (Group-2 kimberlite)	Impala, 20#Shaft	IP20-03_cpx_xx3_rim1	52.16	0.72	0.27	0	4.07	0.12	0.02	16.26	24.71	0.46	0.03	98.82		1.92851	0.0200239	0.0117653	0	0.125846	0.00375798	0.000594867	0.896224	0.978889	0.0329753	0.00141504	4	87.6872	0.491369	0.00015658	0.508474
	Orangeite (Group-2 kimberlite)	Impala, 20#Shaft	IP20-03_cpx_xx3_rim2	51.19	0.73	0.26	0	4.18	0.1	0.01	16.26	24.8	0.5	0.04	98.07		1.90533	0.0204382	0.0114055	0	0.130113	0.00315265	0.000299427	0.902233	0.989041	0.0360831	0.00189938	4		0.490476	0	0.509524
	Orangeite (Group-2 kimberlite)	Impala, 20#Shaft	IP20-03_cpx_xx4_co1	52.93	0.06	0	0.03	1.59	0.08	0.02	17.74	25.94	0.14	0	98.53		1.94374	0.00165738	0	0.000871038	0.0488308	0.00248838	0.000590843	0.971186	1.02067	0.00996809	0	4		0.492492	0	0.507508
	Orangeite (Group-2 kimberlite)	Impala, 20#Shaft	IP20-03_cpx_xx4_co2	53.06	0.03	0	0.03	2.24	0.25	0.07	17.09	25.66	0.26	0	98.69		1.95212	0.000830221	0	0.000872649	0.0689203	0.00779056	0.00207178	0.937332	1.01152	0.0185464	0	4		0.487375	0	0.512625
	Orangeite (Group-2 kimberlite)	Impala, 20#Shaft	IP20-03_cpx_xx4_co3	52.28	0.51	0.11	0.01	3.85	0.23	0.02	16.14	24.79	0.39	0.01	98.34		1.94307	0.0142579	0.00481838	0.000293855	0.119667	0.00724053	0.000597983	0.894271	0.987203	0.0281038	0.000474153	4	88.1978	0.483477	0.00587215	0.510651
	Orangeite (Group-2 kimberlite)	Impala, 20#Shaft	IP20-03_cpx_xx4_co4	51.92	0.53	0.11	0.03	3.73	0.17	0.03	16.26	24.8	0.38	0	97.96		1.93535	0.0148605	0.00483252	0.00088415	0.116277	0.0053674	0.000899606	0.903563	0.990499	0.0274635	0	4		0.489259	0	0.510741
	Evolved Orangeite (Group-2 kimberlite)	Impala, 20#Shaft	IP20-02_cpx_xx03_co1	50.52	2.22	0.14	0.03	6.4	0.17	0.03	14.49	23.95	0.72	0.04	98.71		1.89553	0.0626546	0.00619085	0.000889953	0.20082	0.00540263	0.000905511	0.810489	0.962828	0.0523777	0.00191466	4	80.1426	0.449904	0.0388412	0.511255
	Evolved Orangeite (Group-2 kimberlite)	Impala, 20#Shaft	IP20-02_cpx_xx03_co2	50.42	2.18	0.14	0.04	6.41	0.2	0.05	14.72	23.92	0.73	0.05	98.86		1.88699	0.0613699	0.00617518	0.0011836	0.200624	0.00633994	0.00150536	0.82127	0.959188	0.0529707	0.00238727	4	80.3674	0.461867	0.0277462	0.510386
	Evolved Orangeite (Group-2 kimberlite)	Impala, 20#Shaft	IP20-02_cpx_xx03_co3	50.43	2.23	0.15	0.05	6.31	0.17	0.02	14.57	23.87	0.71	0.05	98.56		1.89413	0.0630026	0.00663998	0.0014848	0.198203	0.00540827	0.000604304	0.815815	0.960615	0.0517042	0.00239583	4	80.4537	0.453219	0.0369362	0.509845
	Evolved Orangeite (Group-2 kimberlite)	Sibanye, Karee-3 Shaft	LM4_Cpx_Co1	51.26	2.07	0.95	0.06	6.33	0.15	0.02	14.18	23.93	0.57	0.02	99.54		1.91035	0.0580281	0.0417267	0.00176793	0.197287	0.00473495	0.000599612	0.787813	0.955552	0.0411867	0.000950889	4	79.9729	0.426502	0.073305	0.500193
	Evolved Orangeite (Group-2 kimberlite)	Sibanye, Karee-3 Shaft	LM4_Cpx_Co2	51.97	1.95	0.97	0.06	6.12	0.13	0.03	14.37	23.98	0.57	0.02	100.17		1.92256	0.0542619	0.0422917	0.00175492	0.189338	0.00407343	0.000892801	0.792495	0.950503	0.0408836	0.000943892	4	80.7158	0.424924	0.0778565	0.497219
	Evolved Orangeite (Group-2 kimberlite)	Sibanye, Karee-3 Shaft	LM4_Cpx_Co3	51.4	1.65	0.94	0.03	6.93	0.17	0.03	14.12	23.92	0.58	0.03	99.8		1.91117	0.0461479	0.0411925	0.000881933	0.215491	0.00535394	0.000897351	0.782676	0.952957	0.0418129	0.00142305	4	78.4114	0.429592	0.0707818	0.499626
	Evolved Orangeite (Group-2 kimberlite)	Sibanye, Karee-3 Shaft	LM4_Cpx2_Co1	50.96	1.96	0.41	0	7.49	0.22	0.04	14.23	23.56	1.03	0.08	99.98		1.88817	0.0546262	0.017904	0	0.232088	0.00690437	0.00119228	0.786011	0.935328	0.073994	0.00378152	4	77.2038	0.456467	0.0335724	0.509961
	Evolved Orangeite (Group-2 kimberlite)	Sibanye, Karee-3 Shaft	LM4_Cpx2_Co2	50.84	2.05	0.38	0.01	7.75	0.26	0	14.04	23.21	1.07	0.08	99.69		1.89146	0.0573691	0.0166621	0.000294151	0.24113	0.0081932	0	0.7787	0.925215	0.077183	0.00379704	4	76.3558	0.450768	0.0432749	0.505958
	Evolved Orangeite (Group-2 kimberlite)	Sibanye, Karee-3 Shaft	LM4_Cpx2_Co3	50.45	1.85	0.59	0.01	8.69	0.22	0.01	13.24	22.98	1.36	0.1	99.5		1.88367	0.0519576	0.0259628	0.000295205	0.271346	0.00695755	0.000300365	0.736961	0.919329	0.0984534	0.00476331	4	73.0889	0.444603	0.0396056	0.515791
	Evolved Orangeite (Group-2 kimberlite)	Sibanye, Karee-3 Shaft	LM4_Cpx2_Co4	50.31	2.51	0.26	0	7.75	0.29	0.02	14.14	22.95	1.14	0.09	99.46		1.8765	0.0704208	0.0114294	0	0.241744	0.00916182	0.000600109	0.786241	0.917178	0.0824416	0.00428254	4	76.4837	0.45962	0.035245	0.505135
	Evolved Orangeite (Group-2 kimberlite)	Sibanye, Karee-3 Shaft	LM4_Cpx2_rim1	50.1	2.09	0.42	0	7.95	0.27	0.02	14.18	23.35	1.1	0.1	99.58		1.86456	0.0585083	0.0184223	0	0.247437	0.00851121	0.000598789	0.786731	0.931112	0.079374	0.00474792	4	76.0738	0.471442	0.0167004	0.511858
	Evolved Orangeite (Group-2 kimberlite)	Sibanye, Karee-3 Shaft	LM4_Cpx2_rim2	50.21	2.05	0.45	0	7.88	0.26	0.02	14.35	23.6	1.13	0.1	100.05		1.8578	0.0570553	0.0196235	0	0.243834	0.00814839	0.000595312	0.79154	0.935616	0.0810652	0.00472035	4	76.4497	0.479897	0.00447736	0.515626
	Evolved Orangeite (Group-2 kimberlite)	Sibanye, Karee-3 Shaft	LM4_cpx3_co1	52.16	1.93	0.8	0.03	7.1	0.17	0.02	13.78	23.73	0.67	0.02	100.41		1.9324	0.0537836	0.0349305	0.000878739	0.219977	0.00533455	0.000596067	0.761064	0.941964	0.0481262	0.000945267	4	77.5772	0.407357	0.095854	0.496789
	Evolved Orangeite (Group-2 kimberlite)	Sibanye, Karee-3 Shaft	LM4_cpx3_co2	51.29	2.02	0.79	0.02	6.5	0.15	0	14.12	23.91	0.63	0.01	99.44		1.91341	0.056684	0.0347343	0.000589909	0.202791	0.00473977	0	0.785278	0.955724	0.0455684	0.000475928	4	79.476	0.426001	0.0717534	0.502245
	Evolved Orangeite (Group-2 kimberlite)	Sibanye, Karee-3 Shaft	LM4_cpx3_co3	51.2	2.12	0.95	0.03	6.53	0.14	0	14.44	24.19	0.55	0.02	100.17		1.89533	0.0590316	0.0414471	0.000878043	0.202157	0.00438968	0	0.796883	0.959462	0.0394753	0.000944518	4	79.7649	0.437008	0.0618529	0.501139
	Evolved Orangeite (Group-2 kimberlite)	Sibanye, Karee-3 Shaft	LM4_cpx4_co1	50.23	2.18	0.58	0.04	6.87	0.17	0.01	14.86	23.94	0.84	0.03	99.75		1.86118	0.0607596	0.0253285	0.00117183	0.212883	0.00533536	0.000298079	0.820836	0.950443	0.0603465	0.00141811	4	79.4061	0.4787	0.0125376	0.508762
	Evolved Orangeite (Group-2 kimberlite)	Sibanye, Karee-3 Shaft	LM4_cpx4_co2	50.42	2.18	0.62	0.06	6.38	0.15	0.02	15.16	24.12	0.79	0.03	99.93		1.86171	0.0605479	0.0269809	0.00175162	0.197011	0.00469127	0.00059408	0.834489	0.954253	0.0565567	0.00141317	4	80.9006	0.484241	0.00713267	0.508626
	Evolved Orangeite (Group-2 kimberlite)	Sibanye, Karee-3 Shaft	LM4_cpx4_co3	50.23	2.07	0.65	0.06	6.18	0.16	0.03	15.3	24.11	0.73	0.03	99.55		1.85996	0.0576558	0.0283667	0.00175659	0.191376	0.00501821	0.000893649	0.844585	0.956564	0.0524095	0.00141718	4	81.5267	0.490564	0.00168413	0.507752
	Evolved Orangeite (Group-2 kimberlite)	Sibanye, Karee-3 Shaft	LM4_cpx5_co1	51.9	2.18	0.4	0.01	7.05	0.17	0.01	13.97	23.56	0.73	0.06	100.04		1.92885	0.0609426	0.0175205	0.00029384	0.219119	0.00535143	0.000298977	0.773999	0.938175	0.052602	0.00284478	4	77.9362	0.415448	0.0864594	0.498093
	Evolved Orangeite (Group-2 kimberlite)	Sibanye, Karee-3 Shaft	LM4_cpx5_co2	50.91	2.17	0.5	0.03	7.49	0.15	0.01	13.93	23.68	0.73	0.06	99.66		1.8999	0.0609143	0.0219914	0.00088517	0.233759	0.00474141	0.000300215	0.774979	0.946858	0.0528198	0.00285656	4	76.8266	0.429298	0.0679018	0.5028
	Evolved Orangeite (Group-2 kimberlite)	Sibanye, Karee-3 Shaft	LM4_cpx5_co3	50.75	2.37	0.62	0.02	7.67	0.16	0.02	14.05	23.61	0.76	0.06	100.09		1.88595	0.0662485	0.0271545	0.00058763	0.238369	0.00503621	0.000597902	0.778365	0.940086	0.054759	0.00284453	4	76.5554	0.436411	0.0633056	0.500284
	Evolved Orangeite (Group-2 kimberlite)	Sibanye, Karee-3 Shaft	LM4	51.43	1.92	0.93	0	6.93	0.13		14.47	24.25	0.65	0.03	100.74		1.89204	0.0531311	0.040323	0	0.21321	0.00405086	0	0.793589	0.95588	0.0463634	0.00140799	4	78.823	0.443158	0.0536719	0.50317
	Evolved Orangeite (Group-2 kimberlite)	Sibanye, Karee-3 Shaft	LM4	50.89	2.5	0.92	0.02	6.66	0.13		14.46	24.22	0.64	0.04	100.48		1.87873	0.0694233	0.0400291	0.000583769	0.20562	0.00406504	0	0.795816	0.958038	0.0458099	0.0018839	4	79.4675	0.442894	0.052785	0.504321
	Evolved Orangeite (Group-2 kimberlite)	Sibanye, Karee-3 Shaft	LM4	50.27	2.57	0.93	0.05	6.9	0.16		14.49	24.28	0.64	0.02	100.31		1.85966	0.0715138	0.0405473	0.00146242	0.213468	0.00501341	0	0.799106	0.962386	0.045904	0.000943884	4	78.9183	0.453103	0.0402403	0.506657
	Evolved Orangeite (Group-2 kimberlite)	Sibanye, Karee-3 Shaft	LM5_cpx1_co1	52.65	1.84	0.22	0.02	6.42	0.22	0.01	14.3	23.2	1.07	0.01	99.96		1.94755	0.0511966	0.0095911	0.000584924	0.198603	0.0068929	0.000297575	0.788566	0.919507	0.0767399	0.000471906	4	79.8816	0.429531	0.0702982	0.500171
	Evolved Orangeite (Group-2 kimberlite)	Sibanye, Karee-3 Shaft	LM5_cpx1_co2	52.28	1.93	0.49	0.03	6.48	0.18	0.01	14.26	23.81	0.8	0.02	100.29		1.93166	0.0536396	0.0213376	0.000876386	0.20023	0.00563322	0.000297236	0.785465	0.942608	0.0573102	0.000942736	4	79.6864	0.424998	0.0729319	0.50207
	Evolved Orangeite (Group-2 kimberlite)	Sibanye, Karee-3 Shaft	LM5_cpx1_co3	52.09	1.95	0.57	0.03	6.59	0.17	0.01	14.08	23.6	0.72	0.01	99.82		1.93642	0.054527	0.0249732	0.000881748	0.204875	0.00535282	0.000299054	0.780295	0.940011	0.0518948	0.000474252	4	79.2041	0.416937	0.0856247	0.497438
	Evolved Orangeite (Group-2 kimberlite)	Sibanye, Karee-3 Shaft	LM5_cpx2_co1	51.85	2.14	0.79	0.01	6.7	0.14	0.01	14.05	23.88	0.69	0.04	100.3		1.9195	0.0595916	0.0344684	0.000292696	0.207431	0.00438991	0.000297813	0.775402	0.947217	0.0495262	0.00188914	4	78.8946	0.418988	0.0804851	0.500527
	Evolved Orangeite (Group-2 kimberlite)	Sibanye, Karee-3 Shaft	LM5_cpx2_co2	51.43	2.21	0.94	0.02	6.64	0.15	0.01	14.09	23.71	0.69	0.07	99.96		1.9094	0.0617171	0.0411305	0.000587069	0.206162	0.00471695	0.000298666	0.779837	0.943167	0.049668	0.00331546	4	79.0911	0.425849	0.0748837	0.499268
	Evolved Orangeite (Group-2 kimberlite)	Sibanye, Karee-3 Shaft	LM5_cpx2_co3	51.23	2.09	1.12	0	6.68	0.15	0.01	14.13	23.93	0.58	0.06	99.98		1.90182	0.0583612	0.0490025	0	0.207387	0.00471656	0.000298642	0.781986	0.951841	0.0417465	0.00284159	4	79.0386	0.428211	0.0723711	0.499418
	Evolved Orangeite (Group-2 kimberlite)	Sibanye, Karee-3 Shaft	LM5_cpx3_co1	52.12	1.86	0.5	0.01	6.75	0.19	0.03	14.17	23.67	0.78	0.03	100.11		1.93068	0.0518265	0.0218289	0.000292877	0.209107	0.00596141	0.00089399	0.782506	0.939465	0.0560206	0.00141772	4	78.9124	0.424518	0.0753019	0.50018
	Evolved Orangeite (Group-2 kimberlite)	Sibanye, Karee-3 Shaft	LM5_cpx3_co2	52.06	2.11	0.46	0.02	6.92	0.19	0.03	13.86	23.31	0.88	0.03	99.87		1.93604	0.0590236	0.0201615	0.000588057	0.215217	0.00598485	0.000897506	0.768397	0.928815	0.0634513	0.0014233	4	78.1198	0.414566	0.0869818	0.498452
	Evolved Orangeite (Group-2 kimberlite)	Sibanye, Karee-3 Shaft	LM5_cpx3_co3	52.43	2.09	0.32	0.02	7.3	0.21	0	13.49	23.18	0.97	0.03	100.04		1.95009	0.0584728	0.0140275	0.000588143	0.227068	0.00661581	0	0.747994	0.923771	0.0699509	0.00142351	4	76.7124	0.400478	0.10035	0.499172
	Evolved Orangeite (Group-2 kimberlite)	Sibanye, Karee-3 Shaft	LM5_cpx5_co1	50.42	2.09	1.22	0.02	5.91	0.1	0.01	14.86	24.08	0.43	0.03	99.17		1.87947	0.058602	0.053598	0.000589443	0.184238	0.00315735	0.000299874	0.825779	0.961759	0.0310777	0.00142666	4	81.7589	0.456817	0.0454006	0.497783
	Evolved Orangeite (Group-2 kimberlite)	Sibanye, Karee-3 Shaft	LM5_cpx5_co2	50.29	2.03	1.28	0.06	5.53	0.09	0.02	15.22	24.45	0.46	0.02	99.45		1.86442	0.0566097	0.0559277	0.0017587	0.171454	0.00282614	0.000596482	0.841179	0.971219	0.0330649	0.000945925	4	83.0685	0.475078	0.0210013	0.50392
	Evolved Orangeite (Group-2 kimberlite)	Sibanye, Karee-3 Shaft	LM5_cpx5_co3	50.69	2.03	1.32	0.07	5.23	0.1	0.01	15.32	24.6	0.43	0.02	99.82		1.87133	0.0563713	0.0574326	0.00204318	0.16147	0.00312693	0.000296985	0.843141	0.973063	0.0307783	0.000941942	4	83.9272	0.471411	0.0249575	0.503632
	Evolved Orangeite (Group-2 kimberlite)	Sibanye, Karee-3 Shaft	LM5_cpx6_co1	51.34	1.82	0.46	0.01	6.63	0.18	0.01	14.71	23.7	0.79	0.01	99.66		1.90445	0.050783	0.0201107	0.000293287	0.205678	0.00565556	0.000298414	0.813465	0.941974	0.0568183	0.000473237	4	79.8186	0.454467	0.0442799	0.501253
	Evolved Orangeite (Group-2 kimberlite)	Sibanye, Karee-3 Shaft	LM5_cpx6_co2	50.97	2.11	0.84	0.03	6.39	0.15	0	14.71	23.97	0.65	0.02	99.84		1.88883	0.0588158	0.0366871	0.000878979	0.198033	0.00470824	0	0.812649	0.95175	0.0467024	0.000945525	4	80.406	0.452657	0.0463671	0.500976

## Sheet: Suppl. Tab. 1e - spinel
	Tappe, S., Shaikh, A.M., Wilson, A.H. and Stracke, A. 2021. Genesis of ultrapotassic rocks on the Kaapvaal craton: deepening the orangeite versus lamproite debate. Geological Society, London, Special Publications.
	Supplementary Table 1 (e). EPMA-determined major and minor element compositions of spinel-group minerals in wt.%
				Oxides wt.%											Cations per formula unit based on 32 oxygens
	Dyke rock	Location	Sample and grain / spot	CaO	MgO	TiO2	FeO	Al2O3	Cr2O3	NiO	MnO	SiO2	Total		Ca	Mg	Ti	Fe	Al	Cr	Ni	Mn	Si	Total	Fe3	Fe2	Cr#	Fe#	Fe3#	Ti#	Mg#
	Orangeite (Group-2 kimberlite)	Impala, 20#Shaft	IP20-01_spl_xx1_co1	0.19	13.52	0.95	17.01	7.08	59.49	0.17	0.27	0.14	98.82		0.0535824	5.30449	0.188043	3.74414	2.19642	12.3803	0.0359918	0.0601932	0.0368476	24	0.973511	2.77063	0.84932	0.343107	0.0626043	0.0127359	0.656893
	Orangeite (Group-2 kimberlite)	Impala, 20#Shaft	IP20-01_spl_xx1_co2	0.18	13.61	0.88	16.94	7.42	58.99	0.15	0.3	0.15	98.62		0.0507417	5.33764	0.174116	3.72722	2.30096	12.2713	0.0317446	0.0668542	0.0394636	24	1.00062	2.7266	0.842099	0.33811	0.0642542	0.0118074	0.66189
	Orangeite (Group-2 kimberlite)	Impala, 20#Shaft	IP20-01_spl_xx1_co3	0.17	13.13	0.89	17.35	6.89	59.45	0.12	0.32	0.11	98.43		0.0482848	5.18829	0.177425	3.84627	2.15275	12.4604	0.0255875	0.0718499	0.0291586	24	0.973703	2.87257	0.852684	0.35636	0.0624696	0.0119959	0.64364
	Orangeite (Group-2 kimberlite)	Impala, 20#Shaft	IP20-01_spl_xx1_co4	0.14	13.1	0.98	18.12	6.85	58.92	0.09	0.32	0.08	98.6		0.0397137	5.1699	0.195121	4.0119	2.13755	12.3337	0.0191664	0.0717593	0.0211795	24	1.09614	2.91576	0.85229	0.360609	0.0704128	0.0133039	0.639391
	Orangeite (Group-2 kimberlite)	Impala, 20#Shaft	IP20-01_spl_xx1_rim1	0.25	2.86	0.57	85.95	0.09	0.72	0.12	0.67	0.13	91.36		0.0820958	1.30661	0.131377	22.0296	0.0325115	0.174474	0.0295834	0.173929	0.0398416	24	15.4506	6.579	0.842929	0.834305	0.98678	0.388273	0.165695
	Orangeite (Group-2 kimberlite)	Impala, 20#Shaft	IP20-01_spl_xx1_rim2	0.22	2.82	0.54	85.87	0.09	0.71	0.1	0.61	0.11	91.07		0.0724999	1.29289	0.124903	22.0869	0.0326265	0.17266	0.02474	0.158913	0.0338314	24	15.4772	6.60969	0.841068	0.836396	0.98691	0.378277	0.163604
	Orangeite (Group-2 kimberlite)	Impala, 20#Shaft	IP20-01_spl_xx1_rim3	0.39	2.77	0.5	85.92	0.06	0.26	0.11	0.69	0.12	90.82		0.12883	1.273	0.115927	22.1526	0.021803	0.0633786	0.027279	0.180184	0.0369951	24	15.609	6.54363	0.744041	0.837142	0.994572	0.57644	0.162858
	Orangeite (Group-2 kimberlite)	Impala, 20#Shaft	IP20-01_spl_xx1_rim4	0.43	2.66	0.56	86	0.08	0.25	0.13	0.7	0.1	90.91		0.142023	1.22227	0.12982	22.1701	0.0290665	0.0609322	0.0322343	0.182769	0.0308249	24	15.5887	6.58134	0.677035	0.843371	0.99426	0.590577	0.156629
	Orangeite (Group-2 kimberlite)	Impala, 20#Shaft	IP20-01_spl_xx2_co1	0.18	13.24	0.92	16.95	6.95	59.58	0.13	0.31	0.12	98.38		0.0510992	5.22911	0.183313	3.7557	2.1704	12.4813	0.0277058	0.0695694	0.0317933	24	0.918078	2.83762	0.851867	0.351768	0.0589653	0.0123568	0.648232
	Orangeite (Group-2 kimberlite)	Impala, 20#Shaft	IP20-01_spl_xx2_co2	0.15	13.88	0.88	16.22	7.7	59.22	0.14	0.24	0.13	98.56		0.0421917	5.43154	0.173733	3.56095	2.38254	12.292	0.029563	0.0533657	0.0341265	24	0.909756	2.65119	0.837641	0.328007	0.0583765	0.0117006	0.671993
	Orangeite (Group-2 kimberlite)	Impala, 20#Shaft	IP20-01_spl_xx2_co3	0.16	13.99	0.93	16.41	7.73	58.93	0.15	0.28	0.15	98.73		0.044887	5.4603	0.183125	3.59326	2.38558	12.1999	0.031592	0.0620975	0.039274	24	0.969746	2.62352	0.836441	0.324539	0.0623422	0.0123997	0.675461
	Orangeite (Group-2 kimberlite)	Impala, 20#Shaft	IP20-01_spl_xx2_rim1	0.32	12.65	0.96	18.07	6.77	58.78	0.1	0.34	0.11	98.1		0.0914652	5.03031	0.192593	4.03129	2.12867	12.3981	0.0214581	0.0768245	0.0293434	24	1.0294	3.00188	0.853465	0.373731	0.0661736	0.0130844	0.626269
	Orangeite (Group-2 kimberlite)	Impala, 20#Shaft	IP20-01_spl_xx2_rim2	0.37	12.23	1.02	18.92	6.8	57.56	0.07	0.41	0.15	97.53		0.106551	4.89982	0.206167	4.25261	2.15416	12.2319	0.0151335	0.0933371	0.0403143	24	1.12097	3.13164	0.850261	0.389922	0.072288	0.0141286	0.610078
	Orangeite (Group-2 kimberlite)	Impala, 20#Shaft	IP20-01_spl_xx3_co1	0.1	14.02	1.09	16.6	8.13	58.1	0.16	0.25	0.18	98.63		0.0280276	5.4668	0.214426	3.6314	2.50663	12.0166	0.033666	0.0553913	0.0470838	24	0.953772	2.67763	0.827405	0.328768	0.0616252	0.0145496	0.671232
	Orangeite (Group-2 kimberlite)	Impala, 20#Shaft	IP20-01_spl_xx3_co2	0.09	13.95	1.15	16.5	8.16	58.16	0.19	0.24	0.22	98.66		0.025229	5.4404	0.226267	3.61012	2.51629	12.031	0.039985	0.0531844	0.0575564	24	0.885091	2.72503	0.827026	0.333728	0.057353	0.0153157	0.666272
	Orangeite (Group-2 kimberlite)	Impala, 20#Shaft	IP20-01_spl_xx3_co3	0.09	13.98	1.1	16.36	8.33	58.08	0.17	0.23	0.19	98.53		0.0252366	5.45373	0.216494	3.58056	2.56948	12.018	0.0357867	0.0509836	0.0497226	24	0.880074	2.70048	0.823857	0.331177	0.056898	0.014624	0.668823
	Orangeite (Group-2 kimberlite)	Impala, 20#Shaft	IP20-01_spl_xx3_co4	0.11	13.89	1.03	16.72	8.43	57.7	0.17	0.28	0.2	98.53		0.0308429	5.41829	0.202705	3.65913	2.60018	11.9387	0.0357846	0.0620634	0.0523365	24	0.951073	2.70806	0.821157	0.333244	0.0613995	0.0137506	0.666756
	Orangeite (Group-2 kimberlite)	Impala, 20#Shaft	IP20-01_spl_xx3_rim1	0.21	11.86	0.92	18.39	6.83	59.7	0.1	0.39	0.12	98.52		0.0601628	4.72706	0.184995	4.11216	2.1525	12.6212	0.0215077	0.0883259	0.032085	24	0.792136	3.32002	0.854302	0.412574	0.0508894	0.0123671	0.587426
	Orangeite (Group-2 kimberlite)	Impala, 20#Shaft	IP20-01_spl_xx4_co1	0.04	13.94	1.06	16.82	7.78	58.54	0.14	0.3	0.15	98.77		0.0112221	5.44097	0.20873	3.68316	2.40109	12.1195	0.0294869	0.0665352	0.0392752	24	0.983367	2.69979	0.834643	0.331639	0.0634267	0.014171	0.668361
	Orangeite (Group-2 kimberlite)	Impala, 20#Shaft	IP20-01_spl_xx4_co2	0.04	13.82	1	16.59	7.9	58.84	0.16	0.28	0.16	98.79		0.0112256	5.39581	0.196977	3.63393	2.43888	12.1854	0.0337098	0.0621189	0.0419067	24	0.897911	2.73602	0.833231	0.336458	0.0578468	0.0132901	0.663542
	Orangeite (Group-2 kimberlite)	Impala, 20#Shaft	IP20-01_spl_xx4_co3	0.03	13.6	0.97	16.8	7.61	59.44	0.16	0.28	0.15	99.04		0.00842501	5.31357	0.191199	3.68246	2.35097	12.3182	0.033733	0.0621616	0.0393145	24	0.869836	2.81262	0.839734	0.346118	0.0559777	0.0128664	0.653882
	Orangeite (Group-2 kimberlite)	Impala, 20#Shaft	IP20-01_spl_xx4_rim1	0.06	12.63	0.93	17.6	7.12	59.18	0.13	0.35	0.16	98.16		0.0171331	5.01748	0.186394	3.92262	2.23654	12.4703	0.0278685	0.0790073	0.04264	24	0.835078	3.08754	0.847925	0.380942	0.0537307	0.0125153	0.619058
	Orangeite (Group-2 kimberlite)	Impala, 20#Shaft	IP20-01_spl_xx4_rim3	0.03	13.41	0.93	16.89	6.72	59.92	0.11	0.3	0.12	98.43		0.00851435	5.29489	0.185258	3.74145	2.09804	12.5493	0.0234373	0.067308	0.0317851	24	0.918557	2.82289	0.856764	0.347741	0.0590108	0.0124899	0.652259
	Orangeite (Group-2 kimberlite)	Impala, 20#Shaft	IP20-01_spl_xx5_co1	0.09	13.31	0.93	17.04	7.16	59.51	0.14	0.31	0.15	98.64		0.0254594	5.2382	0.184652	3.76231	2.22809	12.4226	0.0297317	0.0693238	0.0396013	24	0.900773	2.86154	0.84792	0.353288	0.057922	0.0124467	0.646712
	Orangeite (Group-2 kimberlite)	Impala, 20#Shaft	IP20-01_spl_xx5_co2	0.08	13.31	0.89	16.62	7.45	58.62	0.13	0.35	0.2	97.65		0.0228007	5.27757	0.178038	3.69716	2.33575	12.3288	0.0278155	0.0788571	0.0531986	24	0.872961	2.8242	0.840721	0.34859	0.056184	0.011995	0.65141
	Orangeite (Group-2 kimberlite)	Impala, 20#Shaft	IP20-01_spl_xx5_co3	0.08	13.2	0.86	16.64	7.21	59.11	0.12	0.29	0.2	97.71		0.0228321	5.24116	0.172273	3.70671	2.26362	12.449	0.0257112	0.0654287	0.0532718	24	0.836293	2.87041	0.846144	0.353866	0.0537847	0.0115737	0.646134
	Orangeite (Group-2 kimberlite)	Impala, 20#Shaft	IP20-01_spl_xx5_rim1	0.1	12.85	0.88	17.11	6.67	59.93	0.09	0.36	0.17	98.16		0.0285639	5.10645	0.176427	3.81458	2.09583	12.6322	0.0192995	0.0812897	0.0453189	24	0.828442	2.98614	0.857698	0.368997	0.0532537	0.0118372	0.631003
	Orangeite (Group-2 kimberlite)	Impala, 20#Shaft	IP20-01_spl_xx5_rim3	0.1	12.38	0.87	17.66	6.71	59.57	0.1	0.38	0.18	97.95		0.0287076	4.94443	0.1753	3.95701	2.11901	12.6195	0.0215518	0.0862375	0.0482261	24	0.814414	3.1426	0.856227	0.388598	0.052364	0.0117542	0.611402
	Orangeite (Group-2 kimberlite)	Impala, 20#Shaft	IP20-01_spl_xx5_rim4	0.09	11.91	0.92	18.44	6.61	58.86	0.08	0.4	0.2	97.51		0.0260344	4.79309	0.186792	4.16338	2.10339	12.5645	0.0173733	0.0914705	0.0539943	24	0.850566	3.31282	0.856599	0.408692	0.05481	0.0125746	0.591308
	Orangeite (Group-2 kimberlite)	Impala, 20#Shaft	IP20-01_spl_xx6_co1	0.05	13.8	1	16.57	8.04	58.57	0.14	0.28	0.17	98.62		0.0140459	5.39332	0.197171	3.63313	2.48455	12.1415	0.0295252	0.0621802	0.0445698	24	0.890464	2.74267	0.830128	0.337103	0.0573881	0.0133015	0.662897
	Orangeite (Group-2 kimberlite)	Impala, 20#Shaft	IP20-01_spl_xx6_co2	0.08	13.73	1	16.88	7.97	58.35	0.14	0.27	0.16	98.58		0.022495	5.37112	0.197361	3.70466	2.46529	12.1075	0.0295536	0.0600171	0.0419883	24	0.948496	2.75616	0.83083	0.339125	0.0611093	0.0133621	0.660875
	Orangeite (Group-2 kimberlite)	Impala, 20#Shaft	IP20-01_spl_xx6_co3	0.06	13.69	0.94	16.67	7.71	58.75	0.16	0.31	0.21	98.5		0.0169068	5.36674	0.185909	3.66627	2.38988	12.2162	0.0338466	0.0690535	0.0552256	24	0.911681	2.75459	0.836377	0.339179	0.0587509	0.0125683	0.660821
	Orangeite (Group-2 kimberlite)	Impala, 20#Shaft	IP20-01_spl_xx6_rim1	0.05	12.73	0.96	17.38	6.76	59.31	0.11	0.37	0.12	97.79		0.0143387	5.07885	0.19323	3.89017	2.13255	12.5512	0.0236819	0.0838795	0.0321168	24	0.86557	3.0246	0.854768	0.373248	0.0556662	0.0129885	0.626752
	Orangeite (Group-2 kimberlite)	Impala, 20#Shaft	IP20-01_spl_xx6_rim2	0.04	12.16	0.95	18.29	6.78	58.79	0.1	0.37	0.19	97.67		0.0115265	4.87495	0.192144	4.11369	2.14922	12.5014	0.0216334	0.084286	0.0510981	24	0.862849	3.25084	0.853302	0.400065	0.0556192	0.0129452	0.599935
	Orangeite (Group-2 kimberlite)	Impala, 20#Shaft	IP20-01_spl_xx6_rim3	0.05	12.19	0.98	17.95	6.79	59.02	0.1	0.37	0.15	97.6		0.0144167	4.88987	0.198329	4.03961	2.15366	12.5578	0.0216461	0.0843358	0.0403644	24	0.81118	3.22843	0.853606	0.397673	0.052258	0.0133019	0.602327
	Orangeite (Group-2 kimberlite)	Impala, 20#Shaft	IP20-01_spl_xx7_co1	0.09	13.93	1.07	16.56	8.41	57.69	0.16	0.27	0.2	98.38		0.0252663	5.44063	0.210838	3.62861	2.59722	11.9514	0.0337214	0.059921	0.0524013	24	0.924906	2.7037	0.82148	0.331973	0.0597735	0.0142849	0.668027
	Orangeite (Group-2 kimberlite)	Impala, 20#Shaft	IP20-01_spl_xx7_co2	0.08	13.96	0.99	16.59	8.17	57.81	0.15	0.29	0.23	98.27		0.0224959	5.4613	0.195394	3.64115	2.52725	11.9959	0.0316657	0.0644653	0.0603605	24	0.965322	2.67583	0.825985	0.328842	0.0623251	0.0132754	0.671158
	Orangeite (Group-2 kimberlite)	Impala, 20#Shaft	IP20-01_spl_xx7_co3	0.08	13.69	0.94	16.49	7.93	58.6	0.14	0.28	0.2	98.35		0.0225522	5.36909	0.185991	3.62827	2.45915	12.1903	0.0296287	0.0623982	0.0526189	24	0.873324	2.75494	0.832134	0.33911	0.0562608	0.0125369	0.66089
	Orangeite (Group-2 kimberlite)	Impala, 20#Shaft	IP20-01_spl_xx7_rim1	0.07	12.93	0.96	17.46	7.17	58.85	0.11	0.35	0.17	98.07		0.0199542	5.12782	0.192075	3.88472	2.24837	12.3794	0.0235404	0.0788713	0.0452269	24	0.897601	2.98712	0.846295	0.368101	0.057815	0.0129607	0.631899
	Orangeite (Group-2 kimberlite)	Impala, 20#Shaft	IP20-03_spl_xx2_co1	0.01	12.34	1.42	20.94	4.62	57.78	0.19	0.26	0.11	97.67		0.00290243	4.98282	0.289277	4.74371	1.47509	12.3754	0.0414001	0.0596555	0.0297966	24	1.51142	3.23229	0.893499	0.393457	0.0983876	0.0204585	0.606543
	Orangeite (Group-2 kimberlite)	Impala, 20#Shaft	IP20-03_spl_xx2_co2	0.01	12.16	1.31	21.63	4.16	57.17	0.11	0.29	0.1	96.94		0.00293046	4.95756	0.269446	4.94734	1.34104	12.363	0.0241999	0.0671814	0.0273494	24	1.70242	3.24493	0.902142	0.395603	0.1105	0.0192827	0.604397
	Orangeite (Group-2 kimberlite)	Impala, 20#Shaft	IP20-03_spl_xx2_co3	0.01	12.11	1.4	21.74	4.16	57.82	0.13	0.28	0.11	97.76		0.00291001	4.90272	0.285948	4.9378	1.33168	12.4163	0.0284003	0.0644121	0.0298744	24	1.62042	3.31738	0.903136	0.40357	0.105439	0.0203755	0.59643
	Orangeite (Group-2 kimberlite)	Impala, 20#Shaft	IP20-03_spl_xx2_co4	0.01	12.19	1.44	21.25	4.31	57.31	0.15	0.29	0.17	97.12		0.00292332	4.95768	0.295463	4.84858	1.38601	12.363	0.0329195	0.0670177	0.0463807	24	1.56728	3.28131	0.899192	0.398266	0.102327	0.0210376	0.601734
	Orangeite (Group-2 kimberlite)	Impala, 20#Shaft	IP20-03_spl_xx3_co1	0.03	10.67	1.42	23.37	4.3	57.44	0.22	0.46	0.07	97.98		0.00879948	4.3541	0.29234	5.35025	1.38745	12.4328	0.0484445	0.106662	0.0191623	24	1.55676	3.79349	0.899607	0.465597	0.101239	0.0207149	0.534403
	Orangeite (Group-2 kimberlite)	Impala, 20#Shaft	IP20-03_spl_xx3_co2	0.03	10.23	1.42	23.9	4.27	57.04	0.19	0.53	0.08	97.69		0.0088519	4.19942	0.294082	5.50418	1.38598	12.4197	0.0420876	0.123625	0.0220302	24	1.56205	3.94213	0.899608	0.484199	0.101645	0.0208571	0.515801
	Orangeite (Group-2 kimberlite)	Impala, 20#Shaft	IP20-03_spl_xx3_co3	0.02	9.93	1.34	24.1	4.48	56.63	0.19	0.54	0.09	97.32		0.00592909	4.09549	0.278822	5.57641	1.461	12.3886	0.0422861	0.126551	0.0249008	24	1.54294	4.03347	0.89451	0.496185	0.100239	0.0197348	0.503815
	Orangeite (Group-2 kimberlite)	Impala, 20#Shaft	IP20-03_spl_xx4_co1	0.02	10.42	1.42	23.26	4.24	57.44	0.18	0.51	0.09	97.58		0.00590105	4.27726	0.294071	5.35659	1.37619	12.5064	0.039871	0.118956	0.024783	24	1.47972	3.87687	0.900869	0.475449	0.0963215	0.0207433	0.524551
	Orangeite (Group-2 kimberlite)	Impala, 20#Shaft	IP20-03_spl_xx4_co2	0.02	10.03	1.38	24.03	4.34	57	0.2	0.57	0.14	97.71		0.00590651	4.12098	0.286052	5.53904	1.40995	12.4221	0.0443421	0.133073	0.0385871	24	1.5187	4.02034	0.898066	0.493819	0.0989334	0.0202614	0.506181
	Orangeite (Group-2 kimberlite)	Impala, 20#Shaft	IP20-03_spl_xx4_co3	0.01	10.09	1.41	23.69	4.36	57.33	0.16	0.49	0.12	97.66		0.00295388	4.14651	0.292332	5.46183	1.41675	12.4966	0.0354812	0.114421	0.0330816	24	1.43578	4.02605	0.898174	0.49263	0.0935411	0.0205785	0.50737
	Evolved Orangeite (Group-2 kimberlite)	Impala, 20#Shaft	IP20-02_spl_xx01_co1	0.03	11.59	2.39	25.01	4.53	54.38	0.2	0.24	0.1	98.47		0.0086854	4.66821	0.485658	5.65147	1.44271	11.6178	0.0434694	0.0549281	0.0270197	24	1.91408	3.73739	0.889537	0.444631	0.127822	0.0358519	0.555369
	Evolved Orangeite (Group-2 kimberlite)	Impala, 20#Shaft	IP20-02_spl_xx01_co2	0.01	11.21	2.27	23.87	4.54	55.48	0.16	0.23	0.07	97.84		0.00292213	4.55725	0.465575	5.44417	1.45938	11.9634	0.0350998	0.0531303	0.0190902	24	1.60791	3.83626	0.891276	0.45705	0.106975	0.0335227	0.54295
	Evolved Orangeite (Group-2 kimberlite)	Impala, 20#Shaft	IP20-02_spl_xx01_co3	0	11.32	2.26	23.48	4.46	54.99	0.17	0.27	0.14	97.09		0	4.63093	0.46644	5.38891	1.44268	11.9323	0.0375282	0.0627628	0.0384206	24	1.61527	3.77364	0.892136	0.448999	0.107754	0.0336988	0.551001
	Evolved Orangeite (Group-2 kimberlite)	Impala, 20#Shaft	IP20-02_spl_xx02_co1	0.02	11.47	3.17	26.96	4.29	50.71	0.16	0.25	0.1	97.13		0.00586826	4.68211	0.652835	6.17418	1.38468	10.9797	0.035244	0.0579875	0.0273837	24	2.27516	3.89901	0.888011	0.454371	0.155412	0.0501516	0.545629
	Evolved Orangeite (Group-2 kimberlite)	Impala, 20#Shaft	IP20-02_spl_xx02_co2	0.01	11.64	3.03	26.74	4.22	51.09	0.17	0.26	0.12	97.28		0.00292719	4.74026	0.622526	6.1093	1.35886	11.0358	0.0373581	0.0601643	0.0327827	24	2.2947	3.8146	0.890367	0.445899	0.156215	0.0478233	0.554101
	Evolved Orangeite (Group-2 kimberlite)	Impala, 20#Shaft	IP20-02_spl_xx03_co1	0.02	11.63	2.25	24.06	4.43	54.35	0.13	0.24	0.08	97.19		0.00586078	4.74137	0.462778	5.50302	1.42805	11.7529	0.0285992	0.0555971	0.021879	24	1.84978	3.65323	0.891658	0.435188	0.123067	0.0339188	0.564812
	Evolved Orangeite (Group-2 kimberlite)	Impala, 20#Shaft	IP20-02_spl_xx03_co2	0.02	12.06	2.79	26.02	4.31	51.6	0.15	0.26	0.13	97.34		0.00583065	4.8914	0.570895	5.92071	1.38222	11.1008	0.0328295	0.0599206	0.0353707	24	2.30443	3.61629	0.889272	0.425061	0.155836	0.0437335	0.574939
	Evolved Orangeite (Group-2 kimberlite)	Impala, 20#Shaft	IP20-02_spl_xx04_co1	0.05	11.53	2.21	24.11	4.69	54.28	0.19	0.29	0.11	97.46		0.0146076	4.68637	0.453174	5.49775	1.50728	11.7022	0.0416723	0.0669764	0.0299926	24	1.82421	3.67355	0.885894	0.439424	0.121342	0.0331689	0.560576
	Evolved Orangeite (Group-2 kimberlite)	Impala, 20#Shaft	IP20-02_spl_xx04_co2	0.04	11.56	2.35	24.44	5.01	53.08	0.16	0.28	0.14	97.06		0.0117072	4.70706	0.482754	5.58309	1.61304	11.4642	0.035156	0.0647839	0.0382414	24	1.8808	3.70229	0.876653	0.440259	0.125739	0.0356014	0.559741
	Evolved Orangeite (Group-2 kimberlite)	Impala, 20#Shaft	IP20-02_spl_xx04_co3	0.05	11.28	2.35	24.96	4.58	53.36	0.16	0.28	0.16	97.18		0.0146736	4.60548	0.484061	5.71731	1.47859	11.5558	0.0352512	0.0649593	0.0438228	24	1.9098	3.80752	0.886563	0.452575	0.127795	0.0358073	0.547425
	Evolved Orangeite (Group-2 kimberlite)	Impala, 20#Shaft	IP20-02_spl_xx05_co1	0	11.36	3.05	26.72	4.46	50.94	0.19	0.28	0.11	97.11		0	4.63903	0.62837	6.12163	1.44012	11.0339	0.0418688	0.0649717	0.030134	24	2.209	3.91263	0.88455	0.457528	0.150446	0.0479585	0.542472
	Evolved Orangeite (Group-2 kimberlite)	Impala, 20#Shaft	IP20-02_spl_xx05_co2	0.03	11.45	3	26.29	4.41	50.79	0.18	0.25	0.16	96.56		0.00884544	4.6968	0.620846	6.05018	1.43037	11.0508	0.0398434	0.0582711	0.0440282	24	2.18906	3.86112	0.885398	0.451175	0.149218	0.0473854	0.548825
	Evolved Orangeite (Group-2 kimberlite)	Impala, 20#Shaft	IP20-02_spl_xx05_co3	0.01	11.17	3.1	26.72	4.64	50.46	0.18	0.27	0.16	96.71		0.0029477	4.58073	0.641371	6.14751	1.50458	10.9761	0.0398328	0.0629161	0.0440165	24	2.14854	3.99896	0.879448	0.466096	0.146866	0.0488773	0.533904
	Evolved Orangeite (Group-2 kimberlite)	Impala, 20#Shaft	IP20-02_spl_xx06_co1	0.02	11.11	2.97	26.94	4.71	50.76	0.15	0.29	0.15	97.1		0.00587452	4.53999	0.612299	6.17617	1.52187	11.0023	0.0330765	0.0673373	0.0411193	24	2.16903	4.00714	0.878485	0.468829	0.147622	0.0466107	0.531171
	Evolved Orangeite (Group-2 kimberlite)	Sibanye, Karee-3 Shaft	LM4_ox1_co1_ol-incl.	0.03	12.29	1.8	20.34	4.44	60.81	0.2	0.23	0.07	100.21		0.00852853	4.86075	0.359161	4.51319	1.38851	12.7569	0.0426843	0.0516887	0.0185722	24	1.0991	3.41409	0.90184	0.412587	0.072098	0.0247619	0.587413
	Evolved Orangeite (Group-2 kimberlite)	Sibanye, Karee-3 Shaft	LM4_ox1_co2_ol-incl.	0.03	12.04	1.67	20.19	4.63	60.32	0.2	0.24	0.08	99.4		0.00859896	4.80119	0.335974	4.5169	1.45989	12.7586	0.0430368	0.0543815	0.0214007	24	1.06674	3.45016	0.897325	0.418133	0.0697886	0.0230839	0.581867
	Evolved Orangeite (Group-2 kimberlite)	Sibanye, Karee-3 Shaft	LM4_ox1_co3_ol-incl.	0.03	12	1.77	20.23	4.71	60.29	0.2	0.19	0.1	99.52		0.00858965	4.78006	0.355706	4.52095	1.4835	12.7385	0.0429902	0.0430054	0.0267219	24	1.01317	3.50778	0.895689	0.423244	0.0665019	0.0244007	0.576756
	Evolved Orangeite (Group-2 kimberlite)	Sibanye, Karee-3 Shaft	LM4_ox1_rim1_ol-incl.	0.03	11.39	1.82	20.66	5.04	59.13	0.23	0.21	0.08	98.59		0.00868825	4.58916	0.369953	4.67004	1.60566	12.6368	0.0500062	0.0480779	0.0216229	24	0.974393	3.69565	0.887262	0.446075	0.0640338	0.0253177	0.553925
	Evolved Orangeite (Group-2 kimberlite)	Sibanye, Karee-3 Shaft	LM4_ox1_rim2_ol-incl.	0.04	12.02	1.84	20.99	5.01	59.05	0.21	0.19	0.07	99.42		0.0114427	4.78377	0.369445	4.68662	1.57659	12.4654	0.0450996	0.0429671	0.0186887	24	1.18176	3.50485	0.887723	0.422851	0.0776264	0.0256356	0.577149
	Evolved Orangeite (Group-2 kimberlite)	Sibanye, Karee-3 Shaft	LM4_ox2_co1_ol-incl.	0.05	12.55	1.87	23.06	4.72	57.28	0.15	0.29	0.07	100.04		0.0141694	4.94794	0.371953	5.1006	1.47142	11.9785	0.0319124	0.0649674	0.0185137	24	1.76912	3.33148	0.8906	0.402381	0.116244	0.0269104	0.597619
	Evolved Orangeite (Group-2 kimberlite)	Sibanye, Karee-3 Shaft	LM4_ox2_co2_ol-incl.	0.04	12.09	1.68	22.29	4.32	59.09	0.13	0.31	0.08	100.03		0.0114	4.79367	0.33606	4.9583	1.35438	12.4273	0.0278146	0.0698426	0.0212787	24	1.50368	3.45462	0.901726	0.418829	0.0983744	0.0238042	0.581171
	Evolved Orangeite (Group-2 kimberlite)	Sibanye, Karee-3 Shaft	LM4_ox2_co3_ol-incl.	0.06	11.55	1.83	24.95	4.59	55.74	0.12	0.3	0.08	99.22		0.0172516	4.62017	0.369312	5.59923	1.45179	11.8267	0.0259027	0.068189	0.0214675	24	1.93996	3.65926	0.890666	0.44197	0.127475	0.0270602	0.55803
	Evolved Orangeite (Group-2 kimberlite)	Sibanye, Karee-3 Shaft	LM4_ox2_rim1_ol-incl.	0.05	12.65	2	23.33	4.78	56.06	0.13	0.29	0.09	99.38		0.0142349	5.01041	0.399649	5.18416	1.49701	11.7776	0.0277852	0.0652676	0.0239133	24	1.8783	3.30587	0.887227	0.397518	0.123956	0.0292264	0.602482
	Evolved Orangeite (Group-2 kimberlite)	Sibanye, Karee-3 Shaft	LM4_ox3_co1_ol-incl.	0.05	11.52	1.64	21.64	4.45	59.79	0.14	0.22	0.1	99.55		0.01437	4.60616	0.330824	4.85428	1.40689	12.6805	0.0302066	0.0499834	0.0268226	24	1.19736	3.65693	0.900131	0.442562	0.0783369	0.0229449	0.557438
	Evolved Orangeite (Group-2 kimberlite)	Sibanye, Karee-3 Shaft	LM4_ox3_co2_ol-incl.	0.04	11.58	1.71	21.48	4.76	59.21	0.16	0.24	0.1	99.28		0.0115041	4.63339	0.345186	4.82177	1.50596	12.5662	0.034546	0.0545656	0.0268414	24	1.18375	3.63802	0.892984	0.43983	0.0775925	0.0239423	0.56017
	Evolved Orangeite (Group-2 kimberlite)	Sibanye, Karee-3 Shaft	LM4_ox3_co3_ol-incl.	0.06	11.29	1.8	22.2	4.86	58.05	0.15	0.25	0.11	98.77		0.017359	4.54429	0.36552	5.0131	1.54676	12.3935	0.03258	0.057178	0.0297016	24	1.26929	3.74381	0.889044	0.451709	0.0834533	0.0255505	0.548291
	Evolved Orangeite (Group-2 kimberlite)	Sibanye, Karee-3 Shaft	LM4_ox3_rim1_ol-incl.	0.07	11.18	1.83	22.69	5.18	56.73	0.15	0.24	0.17	98.24		0.020329	4.51709	0.373021	5.14319	1.65486	12.1576	0.0327036	0.0550991	0.0460765	24	1.34931	3.79388	0.880191	0.456491	0.0889938	0.0262959	0.543509
	Evolved Orangeite (Group-2 kimberlite)	Sibanye, Karee-3 Shaft	LM4_ox4_co1_ol-incl.	0.07	11.31	1.79	23.7	5.13	55.71	0.16	0.3	0.11	98.28		0.0202965	4.5623	0.364285	5.36354	1.63627	11.92	0.034828	0.0687638	0.0297666	24	1.65568	3.70786	0.879298	0.448342	0.108841	0.0261689	0.551658
	Evolved Orangeite (Group-2 kimberlite)	Sibanye, Karee-3 Shaft	LM4_ox4_co2_ol-incl.	0.07	11.59	1.83	23.51	5	56.14	0.15	0.26	0.14	98.69		0.020191	4.65095	0.370489	5.29288	1.58651	11.9495	0.0324816	0.0592855	0.0376878	24	1.64761	3.64527	0.882793	0.439389	0.108512	0.0266414	0.560611
	Evolved Orangeite (Group-2 kimberlite)	Sibanye, Karee-3 Shaft	LM4_ox5_co1_ol-incl.	0.04	11.44	1.61	21.25	4.11	59.57	0.13	0.23	0.11	98.49		0.0116316	4.62812	0.328602	4.82302	1.31473	12.7828	0.0283798	0.0528717	0.0298528	24	1.18556	3.63745	0.906741	0.440073	0.0775736	0.0227783	0.559927
	Evolved Orangeite (Group-2 kimberlite)	Sibanye, Karee-3 Shaft	LM4_ox5_co2_ol-incl.	0.06	11.39	1.62	21.24	4.09	58.92	0.15	0.24	0.14	97.85		0.017554	4.63604	0.332663	4.85019	1.31632	12.7206	0.0329459	0.0555075	0.0382266	24	1.22135	3.62884	0.906224	0.439068	0.0800454	0.0231506	0.560932
	Evolved Orangeite (Group-2 kimberlite)	Sibanye, Karee-3 Shaft	LM4_ox5_co3_ol-incl.	0.07	11.51	1.71	21.98	4.79	58.54	0.2	0.21	0.12	99.13		0.0201596	4.61166	0.345656	4.94073	1.51751	12.441	0.0432413	0.0478099	0.0322535	24	1.28569	3.65504	0.891284	0.44214	0.0843397	0.0241647	0.55786
	Evolved Orangeite (Group-2 kimberlite)	Sibanye, Karee-3 Shaft	LM4_ox6_co1_ol-incl.	0.02	11.69	1.77	21.33	4.45	60.13	0.19	0.28	0.08	99.94		0.00572246	4.65335	0.35546	4.76347	1.40064	12.6959	0.0408124	0.0633324	0.0213627	24	1.14986	3.61361	0.900639	0.437115	0.0754186	0.024596	0.562885
	Evolved Orangeite (Group-2 kimberlite)	Sibanye, Karee-3 Shaft	LM4_ox6_co2_ol-incl.	0.02	11.56	1.88	21.4	4.86	59.53	0.21	0.26	0.08	99.8		0.0057253	4.60388	0.377738	4.78147	1.53044	12.5754	0.0451308	0.0588378	0.0213732	24	1.09593	3.68554	0.891503	0.444607	0.0720923	0.0260804	0.555393
	Evolved Orangeite (Group-2 kimberlite)	Sibanye, Karee-3 Shaft	LM4_ox6_co3_ol-incl.	0.03	11.36	1.87	21.45	4.73	59.31	0.16	0.26	0.1	99.27		0.00864574	4.55468	0.378257	4.82489	1.49953	12.6132	0.0346168	0.0592338	0.0268964	24	1.07691	3.74798	0.893747	0.451419	0.0708976	0.0261028	0.548581
	Evolved Orangeite (Group-2 kimberlite)	Sibanye, Karee-3 Shaft	LM4_ox6_rim1_ol-incl.	0.02	10.94	1.81	21.78	4.61	59.56	0.2	0.24	0.1	99.26		0.00578551	4.40279	0.367498	4.91756	1.46699	12.7141	0.0434338	0.0548831	0.0269976	24	1.02995	3.88761	0.896553	0.468929	0.0677107	0.0252601	0.531071
	Evolved Orangeite (Group-2 kimberlite)	Sibanye, Karee-3 Shaft	LM4_ox6_rim2_ol-incl.	0.03	10.78	1.81	21.79	4.49	59.58	0.17	0.23	0.1	98.98		0.0087153	4.3569	0.369066	4.9408	1.4349	12.7726	0.0370762	0.0528207	0.0271127	24	1.00014	3.94066	0.899004	0.474918	0.0657657	0.0253191	0.525082
	Evolved Orangeite (Group-2 kimberlite)	Sibanye, Karee-3 Shaft	LM4_ox6_rim3_ol-incl.	0.02	10.3	1.78	22.1	4.76	58.82	0.15	0.28	0.1	98.31		0.00585958	4.19828	0.366033	5.05368	1.53411	12.7168	0.0329923	0.0648499	0.0273432	24	0.962292	4.09139	0.89235	0.493553	0.0632536	0.0250416	0.506447
	Evolved Orangeite (Group-2 kimberlite)	Sibanye, Karee-3 Shaft	LM4_ox7_co1_ol-incl.	0.04	12.08	1.65	22.91	3.62	58.67	0.11	0.35	0.08	99.51		0.0114837	4.8249	0.332485	5.13367	1.14326	12.4296	0.0237084	0.0794341	0.0214351	24	1.71928	3.41439	0.915769	0.414403	0.112429	0.0239105	0.585597
	Evolved Orangeite (Group-2 kimberlite)	Sibanye, Karee-3 Shaft	LM4_ox7_co2_ol-incl.	0.05	12.12	1.64	23.14	3.65	58.35	0.07	0.35	0.17	99.54		0.0143394	4.83573	0.330118	5.1797	1.15151	12.3487	0.0150711	0.0793496	0.0455012	24	1.74857	3.43113	0.914704	0.415046	0.11467	0.0238692	0.584954
	Evolved Orangeite (Group-2 kimberlite)	Sibanye, Karee-3 Shaft	LM4_ox7_co3_ol-incl.	0.04	11.54	1.56	22.25	3.64	58.41	0.09	0.33	0.08	97.94		0.0116979	4.69517	0.320211	5.07875	1.17101	12.6053	0.0197595	0.0762915	0.0218348	24	1.53962	3.53913	0.914998	0.429803	0.100524	0.0227156	0.570197
	Evolved Orangeite (Group-2 kimberlite)	Sibanye, Karee-3 Shaft	LM5_ox1_gm_co1	0.04	12.28	1.84	20.71	4.83	59.7	0.21	0.21	0.09	99.91		0.0113804	4.86064	0.367433	4.59892	1.51167	12.534	0.044854	0.0472314	0.0238974	24	1.17169	3.42723	0.892375	0.413524	0.0769972	0.0254931	0.586476
	Evolved Orangeite (Group-2 kimberlite)	Sibanye, Karee-3 Shaft	LM5_ox1_gm_co2	0.03	12.3	1.81	20.58	4.84	59.68	0.2	0.2	0.1	99.74		0.00854688	4.87517	0.361934	4.57627	1.51686	12.5468	0.0427762	0.0450435	0.0265888	24	1.15928	3.41699	0.892143	0.412074	0.0761536	0.0250897	0.587926
	Evolved Orangeite (Group-2 kimberlite)	Sibanye, Karee-3 Shaft	LM5_ox1_gm_co3	0.03	11.89	1.74	20.89	4.82	59.59	0.2	0.25	0.09	99.5		0.00859133	4.73717	0.349746	4.66936	1.51845	12.593	0.0429986	0.0565971	0.0240544	24	1.14092	3.52844	0.892396	0.426882	0.0748023	0.0241851	0.573118
	Evolved Orangeite (Group-2 kimberlite)	Sibanye, Karee-3 Shaft	LM5_ox1_gm_rim1	0.02	11.41	1.76	21.08	4.62	59.64	0.19	0.25	0.09	99.06		0.00577622	4.58456	0.356772	4.75186	1.46781	12.7107	0.0411958	0.057078	0.0242588	24	1.05944	3.69242	0.896477	0.446107	0.0695263	0.0245452	0.553893
	Evolved Orangeite (Group-2 kimberlite)	Sibanye, Karee-3 Shaft	LM5_ox1_gm_rim2	0.02	11.15	1.78	21.51	4.86	59.07	0.18	0.23	0.1	98.9		0.00578894	4.48996	0.361621	4.85947	1.54746	12.6169	0.0391135	0.0526274	0.0270136	24	1.05833	3.80115	0.89075	0.458461	0.0695228	0.0248947	0.541539
	Evolved Orangeite (Group-2 kimberlite)	Sibanye, Karee-3 Shaft	LM5_ox1_gm_rim3	0.04	10.92	1.97	23.04	5.56	56.59	0.13	0.25	0.09	98.59		0.0115868	4.40071	0.400528	5.20912	1.7717	12.0965	0.0282703	0.0572476	0.0243308	24	1.28208	3.92704	0.872247	0.471561	0.0846239	0.0280703	0.528439
	Evolved Orangeite (Group-2 kimberlite)	Sibanye, Karee-3 Shaft	LM5_ox1_gm_co1	0.1	12.11	1.81	21.8	4.58	59.17	0.2	0.25	0.08	100.1		0.0284503	4.79324	0.361435	4.84086	1.43339	12.4224	0.0427172	0.0562266	0.0212417	24	1.37882	3.46204	0.896549	0.419373	0.0905058	0.0254222	0.580627
	Evolved Orangeite (Group-2 kimberlite)	Sibanye, Karee-3 Shaft	LM5_ox1_gm_co2	0.08	11.73	1.83	21.75	4.55	59.05	0.17	0.24	0.08	99.48		0.0229577	4.68312	0.368599	4.87167	1.43636	12.5048	0.0366246	0.0544459	0.021426	24	1.27879	3.59288	0.89697	0.434133	0.0840205	0.0257586	0.565867
	Evolved Orangeite (Group-2 kimberlite)	Sibanye, Karee-3 Shaft	LM5_ox1_gm_co3	0.1	11.43	1.91	22.84	4.99	57.79	0.11	0.31	0.09	99.57		0.0286686	4.5588	0.384329	5.11071	1.57369	12.2258	0.0236747	0.0702559	0.0240803	24	1.3837	3.72701	0.88596	0.449807	0.0911339	0.0270964	0.550193
	Evolved Orangeite (Group-2 kimberlite)	Sibanye, Karee-3 Shaft	LM5_ox1_gm_rim1	0.16	11.14	2.02	23.22	5.12	56.71	0.14	0.32	0.09	98.92		0.046197	4.47484	0.409364	5.23282	1.62621	12.0829	0.0303464	0.0730398	0.0242521	24	1.42363	3.80919	0.881377	0.459823	0.0940761	0.0289949	0.540177
	Evolved Orangeite (Group-2 kimberlite)	Sibanye, Karee-3 Shaft	LM5_ox2_gm_co1-ol-incl.	0.04	11.58	1.68	22.03	4.48	59.35	0.15	0.26	0.11	99.68		0.0114737	4.62115	0.338233	4.93216	1.41362	12.5627	0.0323013	0.0589565	0.0294475	24	1.28835	3.6438	0.898855	0.440874	0.0844011	0.0236287	0.559126
	Evolved Orangeite (Group-2 kimberlite)	Sibanye, Karee-3 Shaft	LM5_ox2_gm_co2_ol_incl	0.04	11.52	1.64	21.96	4.45	58.95	0.16	0.28	0.12	99.12		0.0115373	4.62271	0.332012	4.94377	1.41195	12.5472	0.0346459	0.0638439	0.0323028	24	1.31219	3.63158	0.898852	0.439963	0.0859247	0.023232	0.560037
	Evolved Orangeite (Group-2 kimberlite)	Sibanye, Karee-3 Shaft	LM5_ox2_gm_co3_ol_incl	0.04	11.25	1.61	22.21	4.73	58.16	0.16	0.3	0.09	98.55		0.0116055	4.54104	0.327865	5.02959	1.50966	12.4522	0.0348506	0.0688083	0.0243702	24	1.33365	3.69593	0.891873	0.448701	0.0871924	0.0229441	0.551299
	Evolved Orangeite (Group-2 kimberlite)	Sibanye, Karee-3 Shaft	LM5_ox3_gm_co1	0.02	11.54	1.95	23.66	5.05	56.58	0.13	0.26	0.08	99.27		0.00574192	4.60926	0.39294	5.30177	1.59489	11.9869	0.0280192	0.0590086	0.0214353	24	1.58943	3.71235	0.882572	0.44611	0.104766	0.0281178	0.55389
	Evolved Orangeite (Group-2 kimberlite)	Sibanye, Karee-3 Shaft	LM5_ox3_gm_co3	0.03	12.04	1.82	21.77	4.43	59.03	0.14	0.26	0.08	99.6		0.00858488	4.79333	0.365552	4.8624	1.39454	12.4653	0.0300764	0.0588168	0.0213656	24	1.3663	3.49611	0.899383	0.421754	0.0897335	0.0256971	0.578246
	Evolved Orangeite (Group-2 kimberlite)	Sibanye, Karee-3 Shaft	LM5_ox3_gm_rim1	0.03	12.05	1.79	21.97	4.38	58.63	0.12	0.28	0.08	99.33		0.00860544	4.80881	0.360387	4.91883	1.3821	12.4105	0.0258416	0.0634929	0.0214168	24	1.44377	3.47506	0.899794	0.419497	0.094758	0.0254637	0.580503
	Evolved Orangeite (Group-2 kimberlite)	Sibanye, Karee-3 Shaft	LM5_ox4_gm_co1	0.08	12.57	1.7	21.1	4.91	58.73	0.2	0.26	0.11	99.66		0.0227412	4.97115	0.339185	4.6815	1.53539	12.3197	0.0426814	0.0584268	0.0291829	24	1.40814	3.27337	0.889183	0.397036	0.0922566	0.0238958	0.602964
	Evolved Orangeite (Group-2 kimberlite)	Sibanye, Karee-3 Shaft	LM5_ox4_gm_co2	0.06	12.34	1.78	20.86	4.9	59.01	0.2	0.23	0.13	99.51		0.0171128	4.89646	0.356331	4.64369	1.53737	12.4197	0.0428237	0.0518576	0.0346039	24	1.26101	3.38268	0.88985	0.408578	0.0828624	0.0248948	0.591422
	Evolved Orangeite (Group-2 kimberlite)	Sibanye, Karee-3 Shaft	LM5_ox4_gm_co3	0.05	12.47	1.71	21	4.86	59.34	0.21	0.26	0.09	99.99		0.0141891	4.92322	0.3406	4.65139	1.51717	12.4265	0.0447393	0.0583274	0.0238363	24	1.32743	3.32396	0.891193	0.403042	0.0869241	0.0238444	0.596958
	Evolved Orangeite (Group-2 kimberlite)	Sibanye, Karee-3 Shaft	LM5_ox4_gm_rim1	0.05	12.02	1.83	21.04	4.72	59.26	0.18	0.27	0.12	99.49		0.0143093	4.78575	0.367589	4.69972	1.48594	12.5149	0.0386727	0.0610838	0.0320509	24	1.1999	3.49983	0.893867	0.4224	0.0789368	0.0255831	0.5776
	Evolved Orangeite (Group-2 kimberlite)	Sibanye, Karee-3 Shaft	LM5_ox5_gm_co1	0.27	11.35	1.88	22.97	4.85	57.22	0.15	0.3	0.15	99.14		0.077737	4.5463	0.379915	5.16184	1.5361	12.1571	0.0324221	0.0682811	0.0403058	24	1.46636	3.69548	0.88782	0.448384	0.0967284	0.0269958	0.551616
	Evolved Orangeite (Group-2 kimberlite)	Sibanye, Karee-3 Shaft	LM5_ox5_gm_co2	0.23	11.93	1.87	22.51	4.96	57.49	0.17	0.28	0.09	99.53		0.0656968	4.74084	0.374906	5.01847	1.55852	12.1179	0.0364545	0.0632252	0.0239923	24	1.52579	3.49268	0.886043	0.424203	0.100367	0.0266812	0.575797

## Sheet: Suppl. Tab. 1f - andradite
	Tappe, S., Shaikh, A.M., Wilson, A.H. and Stracke, A. 2021. Genesis of ultrapotassic rocks on the Kaapvaal craton: deepening the orangeite versus lamproite debate. Geological Society, London, Special Publications.
	Supplementary Table 1 (f). EPMA-determined major and minor element compositions of andradite-rich garnet in wt.%
				Oxides wt.%													Cations per formula unit based on 12 oxygens
	Dyke rock	Location	Sample and grain / spot	SiO2	TiO2	Al2O3	Cr2O3	FeO	MnO	NiO	MgO	CaO	Na2O	K2O	Total		Si	Ti	Al	Cr	Fe	Mn	Ni	Mg	Ca	Na	K	Sum	pyrope	almandine	spessartine	grossular	andradite	uvarovite	Ti-andradite	schorlomite	vac schorlomite
	Evolved Orangeite (Group-2 kimberlite)	Impala, 20#Shaft	IP20-02_cpx_xx01_co1	28.35	17.14	0.1	0	17.82	0.23	0.02	1.32	32.28	0.35	0	97.61		2.4203	1.10068	0.0100617	0	1.27228	0.0166316	0.00137357	0.167997	2.95275	0.0579337	0	8	0.0559991	0	0.00554385	0	0.325282	0	0.411319	0.177679	0.0781606
	Evolved Orangeite (Group-2 kimberlite)	Impala, 20#Shaft	IP20-02_cpx_xx01_co2	27.35	17.12	0.1	0.01	17.86	0.22	0.01	1.39	32.22	0.32	0	96.6		2.36032	1.11135	0.0101711	0.000682328	1.28901	0.0160815	0.000694256	0.17883	2.97932	0.0535441	0	8	0.0596101	0	0.0053605	0.000479572	0.35071	0.000341164	0.370758	0.198961	0.0718549
	Evolved Orangeite (Group-2 kimberlite)	Impala, 20#Shaft	IP20-02_cpx_xx01_co3	27.19	17.42	0.11	0	17.69	0.22	0	1.43	32.25	0.36	0	96.67		2.34427	1.12974	0.0111776	0	1.27552	0.0160661	0	0.183801	2.97924	0.0601795	0	8	0.0612669	0	0.00535537	0.00117634	0.347788	0	0.361181	0.202695	0.0802394
	Evolved Orangeite (Group-2 kimberlite)	Impala, 20#Shaft	IP20-02_cpx_xx01_co4	27.92	17.39	0.12	0	17.72	0.21	0	1.44	32.02	0.35	0	97.17		2.3947	1.12194	0.0121303	0	1.27104	0.0152561	0	0.184124	2.94261	0.0582037	0	8	0.0613746	0	0.00508537	0	0.319995	0	0.407501	0.186408	0.0776049
	Evolved Orangeite (Group-2 kimberlite)	Impala, 20#Shaft	IP20-02_cpx_xx05_co1	27.35	16.16	0.1	0	18.19	0.23	0.01	1.36	32.16	0.35	0.01	95.92		2.3727	1.05453	0.0102245	0	1.31971	0.0169006	0.000697898	0.175888	2.98936	0.058871	0.00110675	8	0.0586295	0	0.00563355	0.00412427	0.404504	0	0.314255	0.193136	0.0804356
	Evolved Orangeite (Group-2 kimberlite)	Impala, 20#Shaft	IP20-02_cpx_xx05_co2	27.65	16.83	0.08	0	17.93	0.2	0	1.39	32.35	0.35	0	96.78		2.37899	1.08922	0.00811229	0	1.29014	0.0145753	0	0.178289	2.98228	0.0583866	0	8	0.0594297	0	0.00485843	0.000583347	0.365331	0	0.358736	0.191595	0.0778488
	Evolved Orangeite (Group-2 kimberlite)	Impala, 20#Shaft	IP20-02_cpx_xx05_co3	27.12	17.77	0.11	0	17.49	0.2	0.01	1.51	32.11	0.32	0	96.64		2.34054	1.15358	0.0111886	0	1.26234	0.0146199	0.000694275	0.194274	2.96922	0.0535455	0	8	0.0647581	0	0.00487331	0	0.321508	0	0.393197	0.205556	0.0718569
	Evolved Orangeite (Group-2 kimberlite)	Impala, 20#Shaft	IP20-02_cpx_xx05_co4	26.91	17.95	0.1	0.01	17.48	0.22	0	1.53	32.3	0.32	0	96.82		2.31853	1.16331	0.0101544	0.000681204	1.2595	0.016055	0	0.196518	2.98179	0.0534559	0	8	0.0655059	0	0.00535167	0.00123591	0.326421	0.000340602	0.381608	0.213051	0.0712745
	Evolved Orangeite (Group-2 kimberlite)	Impala, 20#Shaft	IP20-02_cpx_xx06_co1	28.64	15.99	0.12	0.01	18.03	0.21	0	1.39	32.51	0.34	0	97.24		2.44687	1.02759	0.012083	0.000675488	1.28823	0.0151966	0	0.177038	2.97599	0.0563202	0	8	0.0590125	0	0.00506554	0.000386156	0.377805	0.000337744	0.368862	0.169514	0.0750937
	Evolved Orangeite (Group-2 kimberlite)	Impala, 20#Shaft	IP20-02_cpx_xx06_co2	28.72	15.77	0.13	0	18.24	0.2	0	1.36	32.27	0.34	0	97.03		2.45939	1.0158	0.0131202	0	1.30625	0.0145065	0	0.173618	2.96086	0.0564507	0	8	0.0578726	0	0.00483549	0	0.381171	0	0.369343	0.165307	0.0752675
	Evolved Orangeite (Group-2 kimberlite)	Impala, 20#Shaft	IP20-02_cpx_xx07_co3	28.37	16.92	0.1	0	17.85	0.2	0.02	1.18	32.36	0.36	0.01	97.37		2.42814	1.0893	0.0100872	0	1.27765	0.0144988	0.00137705	0.150559	2.96756	0.0597398	0.00109189	8	0.0501865	0	0.00483295	0	0.333634	0	0.402345	0.1743	0.0820269

## Sheet: Suppl. Tab. 1g - olivine publ.
	Tappe, S., Shaikh, A.M., Wilson, A.H. and Stracke, A. 2021. Genesis of ultrapotassic rocks on the Kaapvaal craton: deepening the orangeite versus lamproite debate. Geological Society, London, Special Publications.
	Supplementary Table 1 (g). Major and minor element compositions of olivine (in wt.%) from coarse and sheared peridotite xenoliths, Kaapvaal craton and adjoining belts, southern Africa
	Reference	Xenolith type	Locality	Craton	Sample ID	SiO2	TiO2	Al2O3	Cr2O3	FeO	MnO	MgO	CaO	Na2O	NiO	Total	Fo	Mg#
	Simon et al., 2007	coarse peridotite	Lesotho	Kaapvaal	M1	40.7		0.03	0.03	11.4	0.12	48.1	0.04		0.41	100.9	88.2663	0.882663
	Simon et al., 2007	coarse peridotite	Lesotho	Kaapvaal	M1	40.7		0.02	0.04	11.5	0.12	48	0.05		0.38	100.8	88.1539	0.881539
	Simon et al., 2007	coarse peridotite	Lesotho	Kaapvaal	M1	40.3		0.03	0.04	11.5	0.12	48.4	0.04		0.4	100.9	88.2403	0.882403
	Simon et al., 2007	coarse peridotite	Lesotho	Kaapvaal	M2	41.2		0	0.02	7.12	0.08	51.5	0.02		0.43	100.4	92.8036	0.928036
	Simon et al., 2007	coarse peridotite	Lesotho	Kaapvaal	M2	41.4		0.01	0.03	7.11	0.1	51.3	0.02		0.4	100.4	92.787	0.92787
	Simon et al., 2007	coarse peridotite	Lesotho	Kaapvaal	M2	41.8		0.02	0.05	7.01	0.08	51.4	0.07		0.34	100.7	92.8941	0.928941
	Simon et al., 2007	coarse peridotite	Lesotho	Kaapvaal	M5	41.9		0	0.01	7.73	0.11	51.1	0.01		0.45	101.2	92.1789	0.921789
	Simon et al., 2007	coarse peridotite	Lesotho	Kaapvaal	M5	41.8		0	0	7.72	0.09	50.9	0.02		0.4	101	92.1599	0.921599
	Simon et al., 2007	coarse peridotite	Lesotho	Kaapvaal	M9	41.9		0.01	0.02	7.72	0.11	50.8	0.02		0.42	101.1	92.1457	0.921457
	Simon et al., 2007	coarse peridotite	Lesotho	Kaapvaal	M9	41.9		0.01	0.05	7.73	0.09	50.8	0.03		0.44	101	92.1363	0.921363
	Simon et al., 2007	coarse peridotite	Lesotho	Kaapvaal	M13	41.8		0	0.03	7.71	0.1	51.2	0.02		0.41	101.3	92.2116	0.922116
	Simon et al., 2007	coarse peridotite	Lesotho	Kaapvaal	M13	41.9		0.01	0.03	7.72	0.09	51.4	0.04		0.4	101.6	92.2303	0.922303
	Simon et al., 2007	coarse peridotite	Lesotho	Kaapvaal	GP404	41.9			0.02	8.08	0.1	51.3	0.02		0.45	101.8	91.8828	0.918828
	Simon et al., 2007	coarse peridotite	Lesotho	Kaapvaal	GP404	41.9			0.03	8.16	0.09	51.3	0.03		0.43	102	91.809	0.91809
	Simon et al., 2007	coarse peridotite	Lesotho	Kaapvaal	GP404	42.1			0	8.04	0.1	51.4	0.04		0.41	102.1	91.9342	0.919342
	Simon et al., 2007	coarse peridotite	Lesotho	Kaapvaal	LET2	41.9			0.03	6.44	0.07	51.1	0.02		0.4	100	93.3979	0.933979
	Simon et al., 2007	coarse peridotite	Lesotho	Kaapvaal	LET2	41.9			0.03	6.59	0.1	51.1	0.02		0.42	100.2	93.2545	0.932545
	Simon et al., 2007	coarse peridotite	Lesotho	Kaapvaal	LET8	41.6			0	6.55	0.08	51.9	0.01		0.44	100.6	93.3893	0.933893
	Simon et al., 2007	coarse peridotite	Lesotho	Kaapvaal	LET8	41.6			0.01	6.51	0.07	51.9	0.01		0.43	100.6	93.427	0.93427
	Simon et al., 2007	coarse peridotite	Lesotho	Kaapvaal	LET28	41.2		0.01	0	6.87	0.07	51	0.01		0.44	99.6	92.9752	0.929752
	Simon et al., 2007	coarse peridotite	Lesotho	Kaapvaal	LET28	41.2		0.02	0	6.89	0.08	51	0.02		0.41	99.6	92.9562	0.929562
	Simon et al., 2007	coarse peridotite	Lesotho	Kaapvaal	LET29	42		0.01	0.02	7.25	0.09	51.4	0.02		0.42	101.1	92.6686	0.926686
	Simon et al., 2007	coarse peridotite	Lesotho	Kaapvaal	LET29	41.8		0.02	0.05	7.46	0.12	50.9	0.06		0.44	100.8	92.4039	0.924039
	Simon et al., 2007	coarse peridotite	Lesotho	Kaapvaal	LET38	42		0.01	0.02	7.03	0.08	51.5	0.03		0.48	101.2	92.8881	0.928881
	Simon et al., 2007	coarse peridotite	Lesotho	Kaapvaal	LET38	42		0.02	0.03	7.1	0.09	51.5	0.02		0.44	101.2	92.8224	0.928224
	Simon et al., 2007	coarse peridotite	Lesotho	Kaapvaal	LET64	41.4		0	0.02	7.13	0.09	51.1	0.02		0.44	100.2	92.7419	0.927419
	Simon et al., 2007	coarse peridotite	Lesotho	Kaapvaal	LET64	41.5		0.01	0.07	8.53	0.14	50.6	0.09		0.36	101.3	91.3615	0.913615
	Simon et al., 2007	coarse peridotite	Lesotho	Kaapvaal	LQ5	41.9		0.02	0.01	7.18	0.11	51.5	0.02		0.44	101.2	92.7473	0.927473
	Simon et al., 2007	coarse peridotite	Lesotho	Kaapvaal	LQ5	41.8		0.01	0.03	7.1	0.09	51.5	0.04		0.47	101.1	92.8224	0.928224
	Simon et al., 2007	coarse peridotite	Lesotho	Kaapvaal	LQ6	42		0.01	0.02	7.39	0.09	51.6	0.02		0.5	101.6	92.5644	0.925644
	Simon et al., 2007	coarse peridotite	Lesotho	Kaapvaal	LQ6	42		0.02	0.03	7.45	0.11	51.5	0.03		0.44	101.5	92.4951	0.924951
	Simon et al., 2007	coarse peridotite	Lesotho	Kaapvaal	LQ8	41.9		0.01	0.02	7.18	0.1	51.7	0.02		0.45	101.3	92.7734	0.927734
	Simon et al., 2007	coarse peridotite	Lesotho	Kaapvaal	LQ8	41.6		0.01	0.06	7.11	0.09	51.4	0.08		0.42	100.8	92.8	0.928
	Simon et al., 2007	coarse peridotite	Lesotho	Kaapvaal	TP5	41.5		0.01	0.01	6.86	0.08	51.5	0.02		0.42	100.4	93.0481	0.930481
	Simon et al., 2007	coarse peridotite	Lesotho	Kaapvaal	TP5	41.2		0.02	0.01	6.9	0.1	51.2	0.02		0.42	99.9	92.9723	0.929723
	Simon et al., 2007	coarse peridotite	Lesotho	Kaapvaal	TP6	41.5		0.01	0.01	7.4	0.08	50.9	0.02		0.43	100.3	92.4604	0.924604
	Simon et al., 2007	coarse peridotite	Lesotho	Kaapvaal	TP9	41.6			0.01	7.38	0.08	51.3	0.02		0.45	100.8	92.5335	0.925335
	Simon et al., 2007	coarse peridotite	Lesotho	Kaapvaal	TP9	41.7			0.02	7.46	0.1	51.2	0.03		0.44	100.9	92.4451	0.924451
	Simon et al., 2007	coarse peridotite	Lesotho	Kaapvaal	J8	40.5			0.01	6.57	0.08	51.3	0.04		0.43	99	93.2981	0.932981
	Simon et al., 2007	coarse peridotite	Kimberley	Kaapvaal	K1	41.0848	0.0028	0.0028	0.0084	6.9904	0.079	51.1148	0.0214		0.4088	99.6918	92.8765	0.928765
	Simon et al., 2007	coarse peridotite	Kimberley	Kaapvaal	K1	41.261	0.01	0.0094	0.0162	7.046	0.0854	51.0642	0.025		0.4186	99.9108	92.8183	0.928183
	Simon et al., 2007	coarse peridotite	Kimberley	Kaapvaal	K2	41.03	0.0022	0.0008	0.0054	6.976	0.083	51.214	0.0158		0.3742	99.6856	92.8988	0.928988
	Simon et al., 2007	coarse peridotite	Kimberley	Kaapvaal	K2	41.022	0	0	0.0048	6.976	0.0902	51.304	0.0056		0.3764	99.7734	92.9056	0.929056
	Simon et al., 2007	coarse peridotite	Kimberley	Kaapvaal	K1	41.085	0.003	0.003	0.008	6.99	0.079	51.115	0.021		0.409	99.692	92.8729	0.928729
	Simon et al., 2007	coarse peridotite	Kimberley	Kaapvaal	K1	41.261	0.01	0.009	0.016	7.046	0.085	51.064	0.025		0.419	99.91	92.8133	0.928133
	Simon et al., 2007	coarse peridotite	Kimberley	Kaapvaal	K6	41.16	0.0048	0.004	0.002	6.86	0.09	51.394	0.0138		0.3522	99.867	93.0316	0.930316
	Simon et al., 2007	coarse peridotite	Kimberley	Kaapvaal	K6	41.212	0.0084	0.0006	0.0064	6.818	0.1024	51.294	0.0044		0.373	99.8148	93.0587	0.930587
	Simon et al., 2007	coarse peridotite	Kimberley	Kaapvaal	K8	41.162	0.00575	0	0.0015	6.751	0.09075	51.206	0.006		0.3755	99.5925	93.1112	0.931112
	Simon et al., 2007	coarse peridotite	Kimberley	Kaapvaal	K8	40.798	0.0024	0.0014	0.0152	7.043	0.0952	51.1984	0.0106		0.4012	99.5548	92.8336	0.928336
	Simon et al., 2007	coarse peridotite	Kimberley	Kaapvaal	K13	40.9878	0.0044	0.0092	0.0142	7.6464	0.0816	50.8008	0.0296		0.4226	99.967	92.2113	0.922113
	Simon et al., 2007	coarse peridotite	Kimberley	Kaapvaal	K13	41.1792	0.0092	0.009	0.0232	7.5786	0.0804	50.4864	0.039		0.4124	99.7784	92.2307	0.922307
	Simon et al., 2007	coarse peridotite	Kimberley	Kaapvaal	K14	41.0102	0	0.0032	0.0206	7.7746	0.0838	50.3926	0.0256		0.4378	99.7228	92.0321	0.920321
	Simon et al., 2007	coarse peridotite	Kimberley	Kaapvaal	K14	40.9434	0.01	0.0028	0.0328	7.7912	0.0854	50.211	0.0286		0.4316	99.5082	91.9899	0.919899
	Simon et al., 2007	coarse peridotite	Kimberley	Kaapvaal	K18	41.4775	0.035	0.00816667	0.0315	6.265	0.0706667	51.4773	0.0236667		0.360167	99.7253	93.607	0.93607
	Simon et al., 2007	coarse peridotite	Kimberley	Kaapvaal	K18	41.4376	0.0344	0.009	0.036	6.196	0.078	51.558	0.0298		0.352	99.701	93.6822	0.936822
	Simon et al., 2007	coarse peridotite	Kimberley	Kaapvaal	K24	41.244	0.0056	0.004	0	7.536	0.0904	50.694	0.026		0.4366	100.011	92.3002	0.923002
	Simon et al., 2007	coarse peridotite	Kimberley	Kaapvaal	K24	41.196	0.0078	0.004	0	7.572	0.0868	50.726	0.028		0.4062	99.9988	92.2707	0.922707
	Simon et al., 2007	coarse peridotite	Kimberley	Kaapvaal	K25	41.402	0.01	0.002	0.006	6.968	0.0694	51.108	0.032		0.4152	99.9806	92.8929	0.928929
	Simon et al., 2007	coarse peridotite	Kimberley	Kaapvaal	K25	41.3	0.0048	0.006	0.014	6.982	0.0962	51.116	0.042		0.3898	99.9088	92.8806	0.928806
	Simon et al., 2007	coarse peridotite	Kimberley	Kaapvaal	K27	41.286	0.0048	0.002	0.002	7.828	0.09	50.328	0.032		0.4114	99.9522	91.9723	0.919723
	Simon et al., 2007	coarse peridotite	Kimberley	Kaapvaal	K27	41.24	0.0118	0.014	0	7.748	0.092	50.628	0.046		0.415	100.149	92.0912	0.920912
	Simon et al., 2007	coarse peridotite	Kimberley	Kaapvaal	K15	41.3368	0.009	0	0	7.366	0.0904	50.98	0.0086		0.3344	100.117	92.4999	0.924999
	Simon et al., 2007	coarse peridotite	Kimberley	Kaapvaal	K15	41.3694	0.0082	0.0028	0	7.416	0.1052	50.912	0.0158		0.3456	100.159	92.4435	0.924435
	Simon et al., 2007	coarse peridotite	Kimberley	Kaapvaal	K15	41.275	0	0	0.009	7.38	0.077	50.77	0.012		0.33	99.841	92.458	0.92458
	Simon et al., 2007	coarse peridotite	Kimberley	Kaapvaal	K17	41.1799	0.0051	0.0033	0.0132	6.9817	0.0793	50.9134	0.0181		0.4142	99.5901	92.8546	0.928546
	Simon et al., 2007	coarse peridotite	Kimberley	Kaapvaal	K17	41.2151	0.0073	0.0045	0.0239	6.9504	0.0858	50.8775	0.0253		0.421	99.5855	92.8797	0.928797
	Simon et al., 2007	coarse peridotite	Kimberley	Kaapvaal	K3	39.9466	0.0324	0.0078	0.0138	11.7436	0.1058	47.674	0.0282		0.3318	99.8558	87.8554	0.878554
	Simon et al., 2007	coarse peridotite	Kimberley	Kaapvaal	K3	40.0458	0.0328	0.0188	0.013	11.8318	0.1126	47.4444	0.0716		0.327	99.8262	87.7235	0.877235
	Simon et al., 2007	coarse peridotite	Kimberley	Kaapvaal	K4	40.9314	0.014	0.0008	0.006	8.6726	0.1058	49.4172	0.018		0.409	99.5568	91.0346	0.910346
	Simon et al., 2007	coarse peridotite	Kimberley	Kaapvaal	K4	40.9484	0.007	0.0004	0.0062	8.834	0.1144	49.3436	0.0224		0.4342	99.6882	90.8706	0.908706
	Simon et al., 2007	coarse peridotite	Kimberley	Kaapvaal	K19	41.0286	0.018	0.001	0	8.61	0.1094	49.95	0.0172		0.3966	100.114	91.1801	0.911801
	Simon et al., 2007	coarse peridotite	Kimberley	Kaapvaal	K19	40.937	0.0074	0.0024	0	8.978	0.1092	49.998	0.0242		0.3718	100.404	90.8457	0.908457
	Simon et al., 2007	coarse peridotite	Kimberley	Kaapvaal	K21	41.0198	0.0254	0.0002	0	8.71	0.0956	50.04	0.0088		0.3978	100.289	91.1014	0.911014
	Simon et al., 2007	coarse peridotite	Kimberley	Kaapvaal	K21	40.8255	0.005	0.00525	0	8.8175	0.11525	50.1375	0.02075		0.37975	100.286	91.0174	0.910174
	Simon et al., 2007	coarse peridotite	Kimberley	Kaapvaal	K10	41.014	0.0234	0.001	0.0284	7.072	0.0908	50.782	0.0164		0.4332	99.4448	92.7515	0.927515
	Simon et al., 2007	coarse peridotite	Kimberley	Kaapvaal	K10	41.096	0.0092	0.0034	0.0326	6.988	0.088	50.634	0.0344		0.4028	99.254	92.812	0.92812
	Simon et al., 2007	coarse peridotite	Kimberley	Kaapvaal	K11	41.0806	0.03	0.001	0.0086	7.71	0.0968	50.61	0.0114		0.414	99.951	92.1244	0.921244
	Simon et al., 2007	coarse peridotite	Kimberley	Kaapvaal	K11	40.9805	0.04325	0	0.0165	7.6275	0.09625	50.7558	0.01575		0.37375	99.8935	92.2227	0.922227
	Simon et al., 2007	coarse peridotite	Kimberley	Kaapvaal	K16	40.8586	0.0264	0.0004	0.0056	7.878	0.1152	50.479	0.0086		0.4078	99.771	91.9474	0.919474
	Simon et al., 2007	coarse peridotite	Kimberley	Kaapvaal	K16	40.8708	0.02375	0	0.00975	7.9125	0.1145	50.6205	0.00375		0.38475	99.9365	91.9357	0.919357
	Simon et al., 2007	coarse peridotite	Kimberley	Kaapvaal	K20	41.4362	0.00366667	0	0.000166667	7.47333	0.105	51.125	0.00466667		0.402667	100.546	92.4188	0.924188
	Simon et al., 2007	coarse peridotite	Kimberley	Kaapvaal	K20	41.2377	0.011375	0.001875	0	9.0375	0.116625	49.8975	0.021375		0.3255	100.628	90.7738	0.907738
	Simon et al., 2007	coarse peridotite	Kimberley	Kaapvaal	K23	41.2	0.0304	0.004	0.002	8.216	0.1122	50.024	0.02		0.3798	99.9684	91.5611	0.915611
	Simon et al., 2007	coarse peridotite	Kimberley	Kaapvaal	K23	41.3	0.023	0	0	8.512	0.1014	49.746	0.022		0.363	100.045	91.2391	0.912391
	Giuliani, 2018	coarse peridotite	Kimberley	Kaapvaal	XM1/341	40.14	0.0156091	0.00646364	0.0143	10.0973	0.125936	49.3744	0.0185545		0.335091	100.109	89.7098	0.897098
	Giuliani, 2018	coarse peridotite	Kimberley	Kaapvaal	XM1/345	39.9206	0.0137	0.00229091	0.0117727	10.6985	0.119673	49.4938	0.0130818		0.378218	100.639	89.1867	0.891867
	Giuliani, 2018	coarse peridotite	Kimberley	Kaapvaal	XM1/362	40.3931	0.03035	0.0040875	0.025125	8.94047	0.095825	50.35	0.0282		0.339687	100.179	90.9423	0.909423
	Giuliani, 2018	coarse peridotite	Kimberley	Kaapvaal	XM1/142	40.489	0.0272889	0.00528889	0.0207667	7.69048	0.0934	52.0119	0.0130111		0.409044	100.747	92.3417	0.923417
	Giuliani, 2018	coarse peridotite	Kimberley	Kaapvaal	XM1/371	40.432	0.0297429	0.0109	0.0272643	7.73774	0.112907	51.7798	0.0328286		0.352821	100.483	92.2659	0.922659
	Giuliani, 2018	coarse peridotite	Kimberley	Kaapvaal	XM1/355	40.858	0.00604	0.01329	0.02184	6.44895	0.08715	52.2285	0.02574		0.36612	100.03	93.5229	0.935229
	Giuliani, 2018	coarse peridotite	Kimberley	Kaapvaal	XM1/422	41.0843	0.0145333	0.00487575	0.01263	7.12525	0.104922	51.8098	0.0133014		0.370296	100.527	92.8386	0.928386
	Soltys et al., 2016	coarse peridotite	Kimberley	Kaapvaal	BLFX-2	40.3643			0.0259571	9.29624	0.105343	49.4422	0.03565		0.3304	99.5645	90.4602	0.904602
	Rehfeldt et al., 2008	coarse peridotite	Kimberley	Kaapvaal		41.5				7.59	0.14	50.58			0.32	100.13	92.2367	0.922367
	Rehfeldt et al., 2008	coarse peridotite	Kimberley	Kaapvaal		40.95				9.44	0.13	49.35			0.38	100.25	90.3105	0.903105
	Rehfeldt et al., 2008	coarse peridotite	Kimberley	Kaapvaal		40.44				12.9	0.15	46.86			0.25	100.6	86.6246	0.866246
	Rehfeldt et al., 2008	coarse peridotite	Kimberley	Kaapvaal		41.14				10.54	0.19	48.34			0.26	100.47	89.1031	0.891031
	Rehfeldt et al., 2008	coarse peridotite	Kimberley	Kaapvaal		41.05				10.3	0.19	48.92			0.29	100.75	89.4379	0.894379
	Rehfeldt et al., 2008	coarse peridotite	Kimberley	Kaapvaal		40.21				9.73	0.14	49.47			0.27	99.82	90.0642	0.900642
	Rehfeldt et al., 2008	coarse peridotite	Kimberley	Kaapvaal		40.51				9.43	0.13	49.5			0.39	99.96	90.3463	0.903463
	Rehfeldt et al., 2008	coarse peridotite	Kimberley	Kaapvaal		40.6				8.53	0.1	50.2			0.31	99.74	91.2986	0.912986
	Rehfeldt et al., 2008	coarse peridotite	Kimberley	Kaapvaal		40.41				9.29	0.13	49.9			0.36	100.09	90.5451	0.905451
	Rehfeldt et al., 2008	coarse peridotite	Kimberley	Kaapvaal		40.46				9.22	0.09	49.86			0.35	99.98	90.6028	0.906028
	Rehfeldt et al., 2008	coarse peridotite	Kimberley	Kaapvaal		40.86				7.5	0.12	50.98			0.34	99.8	92.3774	0.923774
	Rehfeldt et al., 2008	coarse peridotite	Kimberley	Kaapvaal		40.9				7.49	0.1	50.94			0.33	99.76	92.3812	0.923812
	Rehfeldt et al., 2008	coarse peridotite	Kimberley	Kaapvaal		40.67				7.96	0.12	50.57			0.33	99.65	91.8875	0.918875
	Rehfeldt et al., 2008	coarse peridotite	Kimberley	Kaapvaal		40.72				7.93	0.1	50.99			0.32	100.06	91.9768	0.919768
	Rehfeldt et al., 2008	coarse peridotite	Kimberley	Kaapvaal		40.39				8.73	0.11	49.97			0.34	99.54	91.0755	0.910755
	Rehfeldt et al., 2008	coarse peridotite	Kimberley	Kaapvaal		41.14				7.53	0.1	50.95			0.35	100.07	92.345	0.92345
	Rehfeldt et al., 2008	coarse peridotite	Kimberley	Kaapvaal		40.45				8.5	0.12	50.37			0.36	99.8	91.3533	0.913533
	Rehfeldt et al., 2008	coarse peridotite	Kimberley	Kaapvaal		40.22				10.71	0.14	48.6			0.22	99.89	88.9994	0.889994
	Rehfeldt et al., 2008	coarse peridotite	Kimberley	Kaapvaal		40.19				10.75	0.12	48.54			0.24	99.84	88.9507	0.889507
	Rehfeldt et al., 2008	coarse peridotite	Kimberley	Kaapvaal		40.21				10.69	0.12	48.75			0.21	99.98	89.0477	0.890477
	Rehfeldt et al., 2008	coarse peridotite	Kimberley	Kaapvaal		40.16				11.04	0.12	48.38			0.39	100.09	88.6531	0.886531
	De Hoog et al., 2010	coarse peridotite	Kimberley	Kaapvaal	DC0203	40.3991				8.69785	0.0507415	50.388			0.464311	100	91.1727	0.911727
	De Hoog et al., 2010	coarse peridotite	Kimberley	Kaapvaal	DC0207	40.765				6.84902	0.103158	51.8565			0.426327	100	93.2071	0.932071
	De Hoog et al., 2010	coarse peridotite	Kimberley	Kaapvaal	DC0208	40.5059				7.03821	0.0988778	51.9537			0.403334	100	92.9382	0.929382
	De Hoog et al., 2010	coarse peridotite	Kimberley	Kaapvaal	DC0209	40.7779				6.61574	0.080972	52.122			0.403444	100	93.3539	0.933539
	De Hoog et al., 2010	coarse peridotite	Kimberley	Kaapvaal	DC0212	40.5915				7.6774	0.0922552	51.2165			0.42234	100	92.1852	0.921852
	De Hoog et al., 2010	coarse peridotite	Kimberley	Kaapvaal	DC0213	40.7283				6.64033	0.0788586	52.1294			0.423138	100	93.3317	0.933317
	De Hoog et al., 2010	coarse peridotite	Kimberley	Kaapvaal	DC0215	40.5796				7.49508	0.0826551	51.4286			0.414073	100	92.4434	0.924434
	De Hoog et al., 2010	coarse peridotite	Kimberley	Kaapvaal	DC0318	40.4829				7.81128	0.116875	51.1891			0.399847	100	92.1158	0.921158
	De Hoog et al., 2010	coarse peridotite	Kimberley	Kaapvaal	DC0322	40.4124				8.31284	0.113311	50.7898			0.371642	100	91.5917	0.915917
	De Hoog et al., 2010	coarse peridotite	Kimberley	Kaapvaal	DC0333	40.5035				7.86294	0.0932257	51.1604			0.379958	100	92.0637	0.920637
	De Hoog et al., 2010	coarse peridotite	Kimberley	Kaapvaal	DC0336	40.7296				6.70376	0.0632801	52.0661			0.437277	100	93.2647	0.932647
	De Hoog et al., 2010	coarse peridotite	Kimberley	Kaapvaal	DC0338	40.4887				8.15063	0.127105	50.9102			0.323341	100	91.7602	0.917602
	De Hoog et al., 2010	coarse peridotite	Kimberley	Kaapvaal	DC0342	40.5936				6.78217	0.0990815	52.1247			0.400414	100	93.1984	0.931984
	De Hoog et al., 2010	coarse peridotite	Kimberley	Kaapvaal	DC0343	40.655				6.65154	0.0965342	52.2246			0.3724	100	93.3326	0.933326
	De Hoog et al., 2010	coarse peridotite	Kimberley	Kaapvaal	DC0345	40.487				7.66747	0.0920874	51.3359			0.417525	100	92.2702	0.922702
	Griffin et al., 2009	coarse peridotite	Kimberley	Kaapvaal		40.6				6.91		52			0.277	99.787	93.1	0.931
	Griffin et al., 2009	coarse peridotite	Kimberley	Kaapvaal		40.7				6.16		52.7			0.285	99.845	93.8	0.938
	Griffin et al., 2009	coarse peridotite	Kimberley	Kaapvaal		40.8				5.59		52.9			0.278	99.568	94.1	0.941
	Griffin et al., 2009	coarse peridotite	Kimberley	Kaapvaal		40.8				5.7		53			0.27	99.77	94.3	0.943
	Griffin et al., 2009	coarse peridotite	Kimberley	Kaapvaal		40.6				6.34		52.5			0.272	99.712	93.7	0.937
	Griffin et al., 2009	coarse peridotite	Kimberley	Kaapvaal		40.8				5.77		52.9			0.274	99.744	94.2	0.942
	Hervig et al., 1980	coarse peridotite	Kimberley	Kaapvaal		41.8				7	0.073	52.6			0.4	101.873	93.0541	0.930541
	Hervig et al., 1980	coarse peridotite	Kimberley	Kaapvaal		42				7.04	0.077	52.3			0.385	101.802	92.98	0.9298
	Hervig et al., 1980	coarse peridotite	Kimberley	Kaapvaal		41.8				7.22	0.075	50.8			0.394	100.289	92.6168	0.926168
	Hervig et al., 1980	coarse peridotite	Kimberley	Kaapvaal		41.3				6.56	0.091	51.2			0.324	99.475	93.2954	0.932954
	Hervig et al., 1980	coarse peridotite	Kimberley	Kaapvaal		41.3				7.03	0.093	52			0.395	100.818	92.9517	0.929517
	Hervig et al., 1980	coarse peridotite	Kimberley	Kaapvaal		41.6				6.58	0.09	51.1			0.376	99.746	93.2641	0.932641
	Hervig et al., 1980	coarse peridotite	Kimberley	Kaapvaal		41.9				6.84	0.095	51.1			0.379	100.314	93.0165	0.930165
	Hervig et al., 1980	coarse peridotite	Kimberley	Kaapvaal		42				6.91	0.087	52.8			0.42	102.217	93.1615	0.931615
	Hervig et al., 1980	coarse peridotite	Kimberley	Kaapvaal		41.5				6.83	0.095	51.2			0.33	99.955	93.0387	0.930387
	Hervig et al., 1980	coarse peridotite	Kimberley	Kaapvaal		41.4				7.12	0.089	50.9			0.325	99.834	92.7249	0.927249
	Hervig et al., 1980	coarse peridotite	Kimberley	Kaapvaal		41.5				6.95	0.088	51.5			0.338	100.376	92.9633	0.929633
	Hervig et al., 1980	coarse peridotite	Kimberley	Kaapvaal		41.4				6.44	0.075	51.7			0.433	100.048	93.4695	0.934695
	Hervig et al., 1980	coarse peridotite	Kimberley	Kaapvaal		41.8				7.01	0.078	50.9			0.367	100.155	92.8293	0.928293
	Hervig et al., 1980	coarse peridotite	Kimberley	Kaapvaal		42.3				6.72	0.075	51.7			0.444	101.239	93.2049	0.932049
	Hervig et al., 1980	coarse peridotite	Kimberley	Kaapvaal		42				6.92	0.09	50.5			0.342	99.852	92.8627	0.928627
	Hervig et al., 1980	coarse peridotite	Kimberley	Kaapvaal		41.8				6.64	0.089	51.4			0.387	100.316	93.2438	0.932438
	Hervig et al., 1980	coarse peridotite	Kimberley	Kaapvaal		41.7				6.42	0.086	51.1			0.397	99.703	93.4171	0.934171
	Hervig et al., 1980	coarse peridotite	Kimberley	Kaapvaal		41.6				6.8	0.09	51.3			0.382	100.172	93.0797	0.930797
	Hervig et al., 1980	coarse peridotite	Kimberley	Kaapvaal		41.1				6.22	0.081	50.8			0.41	98.611	93.5737	0.935737
	Hervig et al., 1980	coarse peridotite	Kimberley	Kaapvaal		41.6				5.83	0.073	51.6			0.338	99.441	94.0405	0.940405
	Hervig et al., 1980	coarse peridotite	Kimberley	Kaapvaal		41.8				4.58	0.06	53.1			0.372	99.912	95.3854	0.953854
	Katayama et al., 2009	coarse peridotite	Kimberley	Kaapvaal		40.95	0.05	0.02	0.02	7.1	0.09	51.21	0.02		0.45	99.89	92.8	0.928
	Katayama et al., 2009	coarse peridotite	Kimberley	Kaapvaal		40.9	0.02	0.01	0.02	6.82	0.08	51.98	0.02		0.41	100.24	93.1	0.931
	Katayama et al., 2009	coarse peridotite	Kimberley	Kaapvaal		41	0.01	0.01	0.02	7.44	0.1	51.31	0.02		0.44	100.33	92.5	0.925
	Katayama et al., 2009	coarse peridotite	Kimberley	Kaapvaal		40.89	0.04	0	0.02	8.72	0.13	49.79	0.03		0.38	99.97	91.1	0.911
	Katayama et al., 2009	coarse peridotite	Kimberley	Kaapvaal		41.33	0.01	0	0.02	6.52	0.1	51.67	0.01		0.39	100.04	93.4	0.934
	Katayama et al., 2009	coarse peridotite	Kimberley	Kaapvaal		41.1	0	0	0.02	7.22	0.12	50.92	0.02		0.46	99.84	92.6	0.926
	Boyd and Nixon, 1975	sheared peridotite	Monastery	Kaapvaal		40.5	<0.03	0.06	0.03	8.59	0.12	50.8	0.07		0.39	100.56	91.3373	0.913373
	Boyd and Nixon, 1975	sheared peridotite	Thaba Putsoa	Kaapvaal		40.1	<0.03	0.04	<0.03	11.9	0.14	48.9	0.08		0.32	101.48	87.9898	0.879898
	Boyd and Nixon, 1975	sheared peridotite	Thaba Putsoa	Kaapvaal		39.8	<0.03	0.07	<0.03	11.8	0.15	48.3	0.08			100.2	87.9485	0.879485
	Boyd, 1974	sheared peridotite	Frank Smith	Kaapvaal		40.5	<0.03	<0.03	0.04	7.85	0.09	51.5	0.06		0.33	100.37	92.1239	0.921239
	Boyd, 1974	sheared peridotite	Frank Smith	Kaapvaal		40.7	<0.03	0.07	0.04	8.71	0.13	50.7	0.06		0.38	100.79	91.2111	0.912111
	Boyd, 1974	sheared peridotite	Frank Smith	Kaapvaal		40	0.03	0.05	<0.03	11.8	0.12	48.6	0.07		0.3	100.97	88.014	0.88014
	Boyd, 1974	sheared peridotite	Frank Smith	Kaapvaal		41	0.04	0.05	0.04	8.72	0.13	50.8	0.06		0.36	101.2	91.2177	0.912177
	Simon et al., 2007	sheared peridotite	Kimberley	Kaapvaal		41.4775	0.035	0.00816667	0.0315	6.265	0.0706667	51.4773	0.0236667		0.360167	99.7253	93.607	0.93607
	Simon et al., 2007	sheared peridotite	Kimberley	Kaapvaal		41.4376	0.0344	0.009	0.036	6.196	0.078	51.558	0.0298		0.352	99.701	93.6822	0.936822
	Simon et al., 2007	sheared peridotite	Kimberley	Kaapvaal		41.0806	0.03	0.001	0.0086	7.71	0.0968	50.61	0.0114		0.414	99.951	92.1244	0.921244
	Simon et al., 2007	sheared peridotite	Kimberley	Kaapvaal		40.9805	0.04325	0	0.0165	7.6275	0.09625	50.7558	0.01575		0.37375	99.8935	92.2227	0.922227
	Simon et al., 2007	sheared peridotite	Kimberley	Kaapvaal		41.2	0.0304	0.004	0.002	8.216	0.1122	50.024	0.02		0.3798	99.9684	91.5611	0.915611
	Simon et al., 2007	sheared peridotite	Kimberley	Kaapvaal		41.3	0.023	0	0	8.512	0.1014	49.746	0.022		0.363	100.045	91.2391	0.912391
	Katayama et al., 2009	sheared peridotite	Kimberley	Kaapvaal		40.88	bdl	0.01	0.02	7.1	0.06	51.76	0.03		0.45	100.56	92.8558	0.928558
	Katayama et al., 2009	sheared peridotite	Kimberley	Kaapvaal		41.29	bdl	bdl	0.02	6.33	0.11	51.72	0.03		0.42	101.48	93.5762	0.935762
	Katayama et al., 2009	sheared peridotite	Kimberley	Kaapvaal		40.83	bdl	0.01	bdl	7.34	0.06	51.54	0.01		0.46	100.2	92.603	0.92603
	Smith and Boyd, 1989	sheared peridotite	Frank Smith	Kaapvaal		40.2	0.03	0.05	0.03	11.9		46.8	0.08			99.09	87.5182	0.875182
	Smith and Boyd, 1989	sheared peridotite	Frank Smith	Kaapvaal		41.4	0.02	0.05	0.05	8.89		49.7	0.09		0.35	100.55	90.882	0.90882
	Smith and Boyd, 1989	sheared peridotite	Bultfontein	Kaapvaal		41.6	0.01	0.05	0.06	7		51	0.04		0.44	100.2	92.8518	0.928518
	Stiefenhofer et al., 1999	sheared peridotite	Venetia	Limpopo Belt		39.94	bdl	0.02	0.06	7.27	0.11	51.75	0.06		0.37	99.58	92.696	0.92696
	Stiefenhofer et al., 1999	sheared peridotite	Venetia	Limpopo Belt		39.49	0.03	0.02	0.06	7.7	0.09	51.45	0.07		0.36	99.27	92.2558	0.922558
	Stiefenhofer et al., 1999	sheared peridotite	Venetia	Limpopo Belt		39.96	0.02	0.02	0.07	7.85	0.11	51.37	0.07		0.4	99.87	92.1055	0.921055
	REFERENCES:
	Boyd_&_Nixon_1975_Origins of the ultramafic nodules from some kimberlites of northern Lesotho and the Monastery Mine, South Africa_Phy_Chem_Earth
	Boyd_1974_Olivine megacrysts from the kimberlites of the Monastery and Frank Smith Mines, South Africa_Carnegie Institute Washington Yearbook
	De Hoog_et_al_2010_Trace-element geochemistry of mantle olivine and application to mantle petrogenesis and geothermobarometry. ChemGeo
	Giuliani_2018_Insights into kimberlite petrogenesis and mantle metasomatism_Lithos
	Griffin_et_al_2009_The Composition and Evolution of Lithospheric Mantle: a Re-evaluation and its Tectonic Implications_JPET
	Hervig_et_al_1980_Fertile and barren AlCr-spinel harzburgites from the upper mantle: Ion and electron probe analyses of trace elements in olivine and orthopyroxene: Relation to lherzolites_EPSL
	Katayama_et_al_2009_Mineral chemistry and P–T condition of Coarse and sheared peridotite xenoliths from Kimberley, South Africa: Origin of the textural variation in the cratonic mantle_Lithos
	Rehfeldt_2008_Contrasting types of metasomatism in dunite, wehrlite and websterite xenoliths from Kimberley, South Africa. Geochi_Cosm_Acta
	Simon_et_al_2007_The Origin and Evolution of the Kaapvaal Cratonic Lithospheric Mantle_JPET
	Smith_&_Boyd_1989_Compositional heterogeneities in minerals from sheared lherzolite inclusions from African kimberlites, in: Ross_et_al_(Eds.)_Kimberlites and Related Rocks. 4th International Kimberlite Conference. Geo_Soc_Aus_Perth
	Soltys_et_al_2016_In-situ assimilation of mantle minerals by kimberlitic magmas - Direct evidence from a garnet wehrlite xenolith entrained in the Bultfontein kimberlite (Kimberley, South Africa)_Lithos
	Stiefenhofer_et_al_1999_The Petrology of a Mantle Xenolith Suite from Venetia, South Africa. Proceedings of the 7th International Kimberlite Conference, Cape Town
